# Supplementary material for: Caenorhabditis elegans Lipin 1 moderates the lifespan‐shortening effects of dietary glucose by maintaining ω‐6 polyunsaturated fatty acids
Source: PubMed Central journal article supplement (PMC7294780; doi:10.1111/acel.13150), 2020-05-31
Supplement: ACEL-19-e13150-s001.pdf [file ACEL-19-e13150-s001.pdf]

## Supporting Information

### Supporting Experimental Procedures

**Strains.** All strains were maintained at 20°C on nematode growth media (NGM) seeded on *E. coli* strain OP50 (Stiernagle, 2006). Following strains were used in this study: N2 wild-type, IJ1618 *yhIs95[*fat-5p::fat-5::gfp*; *odr-1p::rfp*]* outcrossed 6 times with Lee laboratory N2 after integrating extrachromosomal arrays of IJ588 *yhEx144[*fat-5p::fat-5::gfp*; *odr-1p::rfp*]* with ultraviolet light (Mariol, Walter, Bellemin, & Gieseler, 2013), AG175 *unc-119(ed3) III*; *avEx122[*lpin-1p::gfp::lpin-1::lpin-1 3'utr + unc-119(+)*]*, IJ530 *yhEx121[*odr-1p::RFP*]*, IJ585 *yhEx141[*fat-2p::fat-2::gfp*; *odr-1p::RFP*]*. ‘Lee laboratory N2’ was used for lifespan assays, because wild-type N2 cultured by different laboratories displayed different lifespan (Gems & Riddle, 2000), and the ‘Lee laboratory N2’ was used for outcrossing mutant and transgenic strains for this study.

**Lifespan screen using *far-3p::gfp* enhancer RNAi clones.** Lifespan screen assays were performed as previously described with modifications (Lee et al., 2015). The number of enhancer RNAi clones was first narrowed down to 56, which elicited robust increases in GFP fluorescence (Table S1): arbitrary brightness score > 4.8 (sum of scores judged by three researchers, with the score range from -3 to +3). All the RNAi clones were verified by sequencing. dsRNA-expressing bacteria were cultured in liquid LB containing 50 µg/mL ampicillin (USB, Cleveland, OH, USA) at 37°C overnight. Cultured dsRNA-expressing bacteria were seeded on 50 µg/mL ampicillin-containing NGM with or without 2% glucose (Junsei, Tokyo, Japan; 111 mM) and cultured at 37°C overnight. The bacteria were treated with 1 mM isopropyl β-D-thiogalactoside (IPTG;

GoldBio, St. Louis, MO, USA) for induction of dsRNA overnight at room temperature. Wild-type worms were fed with dsRNA-expressing bacteria from eggs. Synchronized worms at young (day 1) adult stage were transferred onto plates with freshly seeded dsRNA-expressing bacteria. A lifespan screen was performed under 10  $\mu$ M 5-fluoro-2'-deoxyuridine (FUDR; Sigma, St Louis, MO, USA)-treated conditions to prevent progeny from hatching. Deaths were determined by counting worms that did not respond to gentle touch with a sterilized platinum wire. Worms that burrowed, ruptured, or crawled off the plates were censored but included in subsequent statistical analysis. The lifespan assays for all the tested RNAi clones were performed by at least two researchers independently and semi-blindly; researchers were unaware of which gene was targeted by each of RNAi clones, except controls. Statistical analysis was performed using open-access websites, OASIS (<http://sbi.postech.ac.kr/oasis>) (J. S. Yang et al., 2011) and OASIS 2 (<https://sbi.postech.ac.kr/oasis2/>) (Han et al., 2016).

**Conservation of LPIN-1 motifs in several species.** Domain and motif information regarding *Caenorhabditis elegans* (worm) LPIN-1, *Homo sapiens* (human) Lipin 1, 2 and 3 and *Mus musculus* (mouse) Lipin 1, 2 and 3, *Drosophila melanogaster* (fly) Lipin, and *Saccharomyces cerevisiae* (yeast) Pah1 was obtained from open access website UniProt (<https://www.uniprot.org/>) (Consortium, 2019). Amino-terminal and carboxy-terminal regions of fly, yeast, and worm Lipin proteins were predicted as homologs to corresponding domains of human Lipin 1 via Basic Local Alignment Search Tool (BLAST, <https://blast.ncbi.nlm.nih.gov/Blast.cgi>). Nuclear localization signal (NLS) was predicted by using cNLS mapper ([http://nls-mapper.iab.keio.ac.jp/cgi-bin/NLS\\_Mapper\\_form.cgi](http://nls-mapper.iab.keio.ac.jp/cgi-bin/NLS_Mapper_form.cgi)) (Kosugi,

Hasebe, Tomita, & Yanagawa, 2009). The graphical representation of sequence was illustrated by IBS 3.0 (<http://ibs.biocuckoo.org/>) (Liu et al., 2015). The amino-terminal and carboxy-terminal regions of worm LPIN-1, human Lipin 1, 2 and 3, mouse Lipin 1, 2 and 3, fly Lipin, and yeast Pah1 were visualized separately by employing ClustalX (v. 2.1) (iterate each alignment step) (Larkin et al., 2007).

**Fluorescence imaging of worms.** Fluorescence imaging was performed as described previously with modifications (Lee et al., 2015). For measuring the levels and the subcellular localization of GFP::LPIN-1, transgenic worms were fed with control or *lpin-1* RNAi bacteria, or OP50 with or without additional 2% glucose from hatching. Synchronized young (day 1) adult worms were then anesthetized with 5 mM levamisole on a 2% agarose pad on a slide glass before imaging. The images of the worms were captured by using an AxioCam HRc (Zeiss Corporation, Oberkochen, Germany) camera attached to a Zeiss Axioscope A.1 microscope (Zeiss Corporation, Oberkochen, Germany). The fluorescence intensity of worms was quantified by using ImageJ (<https://imagej.nih.gov/ij/>) (Schneider, Rasband, & Eliceiri, 2012). Background fluorescence signals were subtracted.

**Lifespan assays.** Lifespan assays were performed as described previously with slight modifications (Lee et al., 2015). After dsRNA-expressing bacteria were cultured in liquid LB containing 50 µg/mL ampicillin at 37°C overnight, the bacteria were seeded on NGM plates and incubated at 37°C overnight. One mM IPTG was added on the bacteria-seeded NGM plates for the induction of dsRNA. Briefly, worms that were grown on dsRNA-expressing bacteria-seeded

NGM plates from eggs were transferred to 10  $\mu$ M FUDR-containing plates to inhibit progeny hatching with or without additional 2% glucose at young (day 1) adult stage. For double RNAi treatment, two different types of dsRNA-expressing bacteria were separately cultured using liquid LB media containing 50  $\mu$ g/ml ampicillin (USB, Santa Clara, CA, USA) at 37°C overnight until the optical density (OD) value at 600 nm reached 0.9. The bacteria were then mixed to 1:1 ratio. The mixed bacteria were seeded on NGM plates and incubated at 37°C overnight. Ten mM IPTG was added on the bacteria-seeded NGM plates for the induction of dsRNA. Dead worms that did not show any movement upon gentle touch with a platinum wire were counted. The lifespan assays for each experiment were performed by at least two researchers independently for reproducibility. Worms that crawled off the plates, burrowed, or displayed ruptured vulvae or internal hatching were classified as censored worms but were included in subsequent statistical analysis. Fatty acid-treated plates were prepared as described previously with modifications (Lee et al., 2015; F. Yang et al., 2006). Specifically, 600  $\mu$ M of linoleic acids (18:2n-6, Sigma, St Louis, MO, USA), arachidonic acids (20:4n-6, Sigma), or oleic acids (18:1n-9, Sigma, St Louis, MO, USA) dissolved in ethanol were mixed with NGM containing 0.1% NP-40 (Sigma, St Louis, MO, USA) and 50  $\mu$ g/mL ampicillin for specific fatty acid feeding assays. For saturated fatty acid (SFA) feeding, 600  $\mu$ M of myristic acid (14:0, Sigma, St Louis, MO, USA) and palmitic acid (16:0, Sigma, St Louis, MO, USA) dissolved in ethanol were mixed with NGM containing 0.1% NP-40 and 50  $\mu$ g/mL ampicillin. For control plates for fatty acid feeding assays, NGM was mixed with ethanol, 0.1% NP-40 and 50  $\mu$ g/mL ampicillin. Statistical analysis was performed by using OASIS2 (<https://sbi.postech.ac.kr/oasis2>) (Han et al., 2016), which calculates *p* values using log-rank (Mantel-Cox method) test.

**RNA seq analysis.** RNA was extracted as described previously with minor modifications (Lee et al., 2019). Worms were fed with control or *lpin-1* RNAi bacteria on control or 2% glucose-containing NGM plates from hatching. Synchronized worms were harvested when worms reached young (day 1) adult stage. RNA was extracted using RNAiso plus (Takara Bio Inc., Shiga, Japan). TruSeq (unstranded) mRNA libraries (Illumina, CA, USA) were constructed and paired-end sequencing of Illumina platform was performed by Macrogen (Seoul, South Korea). Sequencing pairs were aligned to the *C. elegans* genome WBcel235 (ce11) and Ensembl transcriptome (release 95) by using STAR (v.2.7.0e) (Dobin et al., 2013). Aligned pairs on genes or transcripts were quantified by using RSEM (v.1.3.1) (Li & Dewey, 2011). Detailed parameters of alignment and quantification referred to guidelines of ENCODE long RNA-Seq processing pipeline (<https://www.encodeproject.org/pipelines/ENCPL002LPE/>). Differentially expressed genes (fold change > 2 and adjusted *p* value < 0.05) were identified by using DESeq2 (v.1.22.2) (Love, Huber, & Anders, 2014). Wald test *p* values were adjusted for multiple testing using the procedure of Benjamini and Hochberg (Love et al., 2014). Gene expression changes that were greater with glucose-rich diet feeding (fold change > 2) in *lpin-1* RNAi conditions than in control RNAi conditions were defined as *lpin-1*-dependent glucose-responsive genes. GO terms enriched in certain genes were identified by GOstats (v.2.48.0) (Falcon & Gentleman, 2007) and summarized by Revigo (Supek, Bosnjak, Skunca, & Smuc, 2011). For the tissue enrichment analysis, genes of interest were compared with genes expressed in different tissues by using ‘Worm tissue’ (<http://worm.princeton.edu/predictions/batch/>) (Kaletsky et al., 2018). R (v.3.5.3, <http://www.r-project.org>) was used for plotting results. Raw data and processed data are available at Gene Expression Omnibus (<https://www.ncbi.nlm.nih.gov/geo>, GSE138035).

**A genome-wide RNAi screen using *fat-5p::fat-5::gfp*.** A genome-wide RNAi screen using a liquid culture system was performed as described previously with modifications (Lehner, Tischler, & Fraser, 2006). Each of 19,213 RNAi bacteria from commercially available *C. elegans* RNAi library (Source BioScience, Nottingham, UK) was cultured in 200  $\mu$ L liquid LB media with 50  $\mu$ g/mL ampicillin using 96 well plates overnight at 37°C. RNAi bacteria were treated with 4 mM IPTG to induce dsRNA at 37°C for 1 hr, and the bacteria were spun down by centrifugation (870 g for 10 min) and the supernatant was then discarded. Pellet was resuspended by adding liquid nematode growth media (NGM) with 4 mM IPTG and 50  $\mu$ g/mL ampicillin. Worms were synchronized by bleaching gravid adult worms cultured on OP50-seeded high growth (HG) plates with bleach (mix 5 N NaOH and household bleach to 1:2 ratio) solution (Stiernagle, 2006), and the eggs were allowed to hatch to become L1 larvae in 15 mL tube with M9 buffer for synchronization at 20°C. The synchronized L1 larvae in 15  $\mu$ L M9 buffer drops were counted to calculate the number of worms per volume. Approximately 20 L1 worms were then transferred into each well of RNAi bacteria-containing 96 well plates by using a micropipette. After three days of culture, day 1 adult worms in each well were scored for GFP intensity by four researchers, with a semi-quantitative range from -3 (dimpest) to +3 (brightest). Control RNAi (L4440) and *gfp* RNAi were used as control scores 0 and -3, respectively. Cut-off scores were arbitrarily set to include 1% of the total RNAi clones that were examined; RNAi clones that displayed GFP intensity scores greater and less than the arbitrary cut-off scores +2.75 and -2.50 respectively were selected as enhancer and suppressor candidate RNAi clones from the primary screen. The liquid-based screen was subsequently repeated six times using a sub-library that included the candidate RNAi clones from the primary screen.

**Confirmation of the genome-wide RNAi screen using *fat-5p::fat-5::gfp* on solid media.** For confirmation of the whole-genome RNAi screen using *fat-5p::fat-5::gfp* on solid NGM plates, 56 RNAi clones that substantially and reproducibly altered the intensity of GFP fluorescence from the liquid-based RNAi screen were chosen; cut-off values from 6 repeats were arbitrarily set to -1.1 and +0.7 for suppressor and enhancer RNAi clones, respectively. RNAi clones that oppositely ( $\geq +2$  for suppressors and  $\leq -2$  for enhancers) altered GFP intensity at least one of 6 sets were excluded. The 56 RNAi clones were cultured in LB media with 50  $\mu\text{g}/\text{mL}$  ampicillin overnight at 37°C. Subsequently, 100  $\mu\text{L}$  of RNAi bacteria was seeded and grown on solid NGM plates containing 50  $\mu\text{g}/\text{mL}$  ampicillin overnight at 37°C. One mM IPTG was added on the RNAi bacteria-seeded NGM plates for the induction of dsRNA for 24 hrs at room temperature. *fat-5p::fat-5::gfp* transgenic worms at gravid adult stages were transferred onto the dsRNA-expressing bacteria seeded-plates to allow to lay eggs. The worms were anesthetized with 100 mM sodium azide and subsequently used for imaging at young (day 1) adult stage.

**Nile red staining.** Nile red staining was performed as described previously with modification (Ashrafi et al., 2003; Pino, Webster, Carr, & Soukas, 2013). Nile red powder (Sigma, St Louis, MO, USA) was dissolved in acetone to 0.5 mg/mL (stock solution) and stored at -20°C. Gravid adults were allowed to lay eggs overnight on control or *lpin-1* RNAi bacteria-seeded NGM plates containing 50  $\mu\text{g}/\text{mL}$  ampicillin with or without 2% glucose. Synchronized worms at young adult stage (day 1) were harvested and washed once using M9 buffer with 0.01% triton X-100 (Daejung, Siheung, South Korea). Worms were fixed using 500  $\mu\text{L}$  of 40% isopropanol for 3 min at room temperature. Worms were collected by spinning down briefly and the supernatant was

discarded. Fixed worms were stained using 500  $\mu$ L of 3  $\mu$ g/mL Nile red solution (3  $\mu$ L stock solution to 500  $\mu$ L of 40% isopropanol) for 2 hrs at room temperature in the dark. By adding 500  $\mu$ L of M9 buffer with 0.01% Triton X-100, worms were destained for 30 min. GFP emission filter was used to detect Nile red signals. Images of worms that were placed on a 2% agarose pad on a slide glass were captured by using a camera (AxioCam HRc, Zeiss Corporation, Oberkochen, Germany) attached to a Zeiss Axioscope A.1 microscope (Zeiss Corporation, Oberkochen, Germany). For quantification, ImageJ (<https://imagej.nih.gov/ij/>) (Schneider, Rasband, & Eliceiri, 2012) was used. Circular region of interest (ROI) covering first two anterior intestinal cells was used for detecting Nile red fluorescence. Background signals were subtracted. For confocal imaging, images of fixed and stained worms that were placed on a 2% agarose pad on a slide glass were captured by using a confocal microscope (LSM880, Zeiss Corporation, Oberkochen, Germany). FITC emission filter was used to detect Nile red signals under the confocal microscope. Exposure time and gain of fluorescence laser were set by using Zen software (black edition v2.3; Zeiss Corporation, Oberkochen, Germany).

**Oil red O staining.** Oil red O staining was performed as described previously with modifications (O'Rourke, Kuballa, Xavier, & Ruvkun, 2013). Oil red O powder (Sigma, St Louis, MO, USA) was dissolved in 100% isopropanol to 0.5% (w/v) by rocking at room temperature for one day. After filtering with 0.45  $\mu$ m minisart filter (Sartorius stedim, Göttingen, Germany), the 0.5% Oil red O solution was diluted to 0.3% with double distilled water (ddH<sub>2</sub>O) and placed on a shaker at room temperature for two days. During the two-day shaking, precipitated aggregates from the 0.3% Oil red O were filtered with 0.45  $\mu$ m minisart filter two



more times. Prior to staining experiments, the 0.3% Oil red O was freshly prepared by filtering with 0.45  $\mu\text{m}$  minisart filter once more. Worms were fed with control RNAi and *lpin-1* RNAi bacteria on control or 2% glucose-containing NGM plates with 50  $\mu\text{g}/\text{mL}$  ampicillin from hatching. Worms at young (day 1) adult stage were harvested with M9 buffer in microtubes and were fixed with 60% isopropanol for two min. Worms were stained with the 0.3% Oil red O in an airtight plastic box with wet paper at 25°C over 18 hrs. After staining, worms were washed once and de-stained with M9 buffer containing 0.01% Triton X-100 (Daejung, Siheung, South Korea). The samples were stored at 4°C until microphotographs were captured. The differential interference contrast (DIC) images of worms that were placed on a 2% agarose pad on a slide glass were captured by using a camera (AxioCam HRc, Zeiss Corporation, Oberkochen, Germany) attached to a Zeiss Axioscope A.1 microscope (Zeiss Corporation, Oberkochen, Germany). The Oil red O intensity of worms was quantified by using ImageJ (<https://imagej.nih.gov/ij/>) (Schneider et al., 2012). The backgrounds of the images were subtracted and the images were converted to 8-bit grayscale images. By using circle tools in ImageJ (<https://imagej.nih.gov/ij/>) (Schneider et al., 2012), the areas that had intensities over 142 (arbitrary threshold) in first two anterior intestinal cells were measured for detecting the Oil red O signals.

**Body size measurement assays.** Gravid wild-type worms were allowed to lay eggs on 50  $\mu\text{g}/\text{mL}$  ampicillin-containing NGM plates seeded with control or *lpin-1* RNAi bacteria under control or 2% glucose-diet conditions. Progeny were anesthetized with 5 mM levamisole at young (day 1) adult stage. Anesthetized worms were placed on a 2% agarose pad and bright field images were

captured by using a camera (AxioCam HRc, Zeiss Corporation, Oberkochen, Germany) attached to a Zeiss Axioscope A.1 microscope (Zeiss Corporation, Oberkochen, Germany). The area of worms was quantified by using ImageJ (<https://imagej.nih.gov/ij/>) (Schneider et al., 2012).

**Quantitative RT-PCR.** Quantitative RT-PCR was performed as described previously with slight modifications (Lee et al., 2015). Worms were fed with control RNAi or *lpin-1* RNAi bacteria on control or 2% glucose-containing diets for entire life. Synchronized worms were harvested at young (day 1) adult stage and washed at least twice with M9 buffer. RNA was extracted using RNAiso plus (Takara, Japan) and phase lock gel (VWR, PA, USA). For reverse transcription, random primers (6 mers, Cosmogenetech, South Korea) were used and reverse transcription was performed using ImProm-II™ Reverse Transcriptase kit (Promega, Madison, WI, USA).

Quantitative real time PCR was performed by using StepOne and StepOnePlus Real-Time PCR systems (Applied Biosystems, Foster City, CA, USA) and using SYBR Green PCR Master Mix (Applied Biosystems, Foster City, CA, USA). Relative quantity of the mRNA was calculated by employing comparative Ct methods described in the manufacturer's manual. *ama-1*, an RNA polymerase II large subunit, *tba-1*, tubulin  $\alpha$ , and *pmp-3*, ATP binding cassette subfamily, was used as endogenous reference genes for normalization (Hoogewijs, Houthoofd, Matthijssens, Vandesompele, & Vanfleteren, 2008; Zhang, Chen, Smith, Zhang, & Pan, 2012). The levels of mRNA were normalized by multiple controls (*ama-1*, *tba-1* and *pmp-3*). Sequences of primers that were used in this study are as follows.

*ama-1*-F: TGGA ACTCTGGAGTCACACC

*ama-1*-R: CATCCTCCTTCATTGAACGG

*pmp-3-F*: GTTCCCGTGTTT ATCACTCAT

*pmp-3-R*: ACACCGTCGAGAAGCTGTAGA

*tba-1-F*: GTACACTCCACTGATCTCTGCTGACAAG

*tba-1-R*: CTCTGTACAAGAGGCAAACAGCCATG

*lpin-1 3' UTR-F*: GTACACGATGATGAGCTCCTAG

*lpin-1 3' UTR-R*: GAATGTGATTGTTGCTGGCATC

*lpin-1 5' UTR-F*: GTGACATTCGGATGTGTTAATTGG

*lpin-1 5' UTR-R*: CGATTGCTCCTGAAAGTGTGG

*fat-1-F*: TTCACCATGCTTTCACCAACCAC

*fat-1-R*: GTGTACACTGGGAACCATTTAAGCC

*fat-2 3' UTR-F*: CGTTACCCTCGACTATTTGA

*fat-2 3' UTR-R*: CACGTGTCAGGAGATTTTG

*fat-4-F*: GGTCTTAACTATCAGATTGAGCACC

*fat-4-R*: CGGAATTGCTCAATTTCAAGCC

*fat-5-F*: GTTCCAGAGGAAGAACTACCTCCCC

*fat-5-R*: GGGTGAAGCAGTAACGGAAGAGGGC

*fat-6-F*: CAAGAGGAGAGCAAGAAGATCC

*fat-6-R*: CACGGTTTGCCATTTTGCCTCG

*fat-7*-F: CTGCACGTCGCCGCAGCCATTG

*fat-7*-R: GAGAGCAAATGAGAAGACGGCC

*fat-7* 3' UTR-F: CAATTGCCGATGAGTTTATCAGC

*fat-7* 3' UTR -R: CTTTTATGGACAACCAACGCG

**Gas chromatography and mass spectrometry (GC/MS).** GC/MS was performed as previously described with slight modifications (D. Lee et al., 2015). Worms treated with *lpin-1* RNAi with or without additional 2% glucose were synchronized by using a bleach method (Stiernagle, 2006). Young (day 1) adult worms were collected using ddH<sub>2</sub>O. Approximately 400  $\mu$ L of wet worm pellet was frozen in liquid nitrogen and stored at -80°C until use. The worms were sonicated on ice (30 amplitude, 10 sec on, 2 sec off, 6 cycles) and 10  $\mu$ L of total worm lysate was used for total protein quantification. Total protein amount was measured by using bicinchoninic acid (BCA) protein assay kit (Thermo Scientific, MA, USA). Three hundred  $\mu$ L of worm lysate was then used for the GC/MS analysis. Five mL ice-cold chloroform/methanol (1:1 ratio) was added to a glass tube. The worm lysates mixed with chloroform/methanol were vortexed and incubated for approximately 2 hrs at room temperature. The samples were then treated with 2 mL Hajra's solution (0.2 M H<sub>3</sub>PO<sub>4</sub>, 1 M KCl) and mixed thoroughly by shaking. The glass tubes were centrifuged (870 g, 10 min) to separate lipid-containing chloroform from aqueous phase liquids. By using glass Pasteur pipettes, lipid-containing chloroform layer was separated and transferred into new glass tubes. Three mL chloroform was added to the remaining aqueous phase solution and centrifuged to further extract residual lipids. The combined lipid-containing chloroform layers were evaporated to 120  $\mu$ L, and 20  $\mu$ L of the solution was

subsequently used for analyzing total lipid extract.

**Images of bacterial lawns on plates containing various fatty acids.** Plates containing saturated fatty acid (SFA) mixture of myristic acid (14:0) and palmitic acid (16:0), oleic acid (18:1n-9), linoleic acid (18:2n-6), or arachidonic acid (20:4n-6) were prepared as described in Experimental Procedures. Control or *lpin-1* RNAi bacteria were seeded on plates containing indicated fatty acids and cultured overnight. The images of bacterial lawns were captured by using a DIMIS-M camera (Siwon Optical Technology, Anyang, Korea).

Figure S1

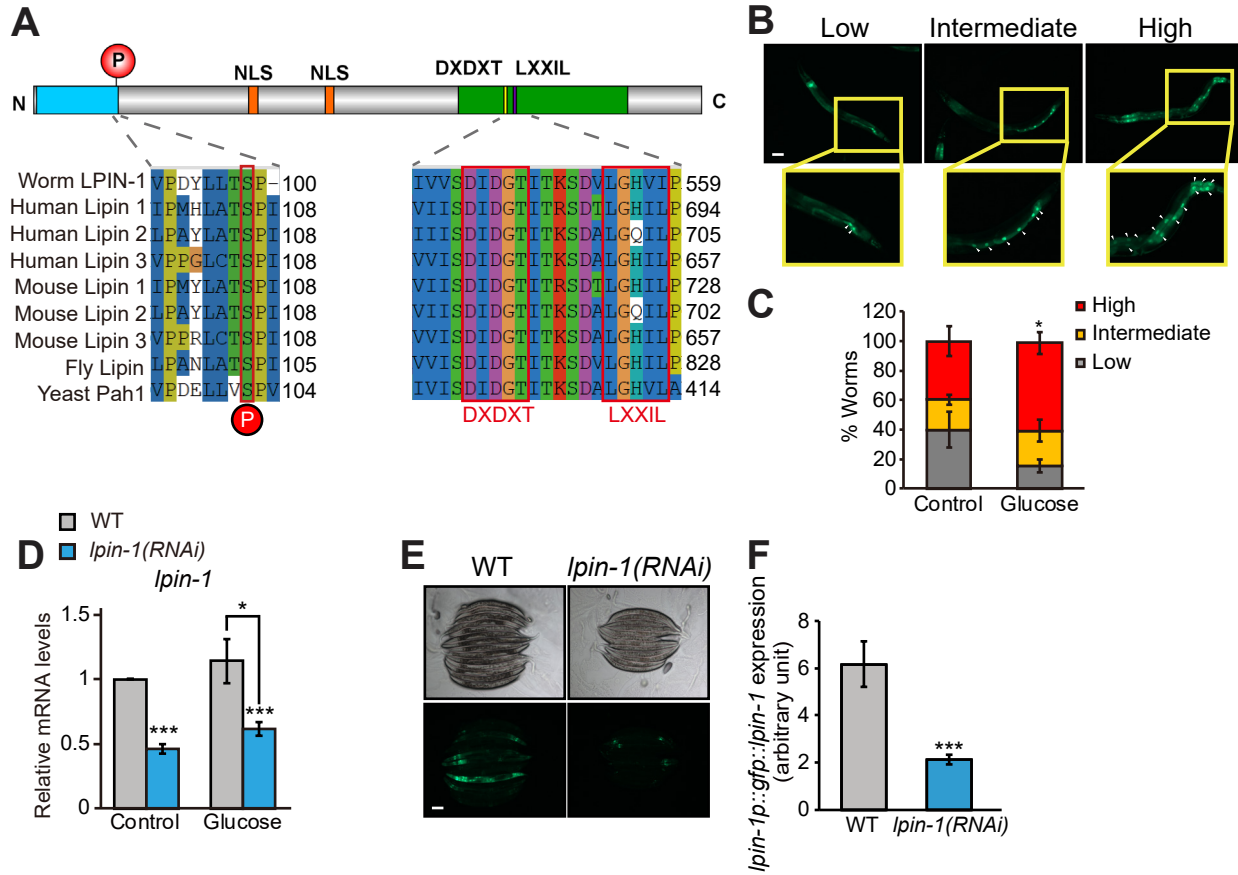

## Supporting Figure Legends

**Figure S1. Lipin 1/LPIN-1 is conserved among various species.** (A) Conservation of amino acid sequences in Lipin 1/LPIN-1 among different species. Upper part: the domain structure of LPIN-1 that is modified from a previous paper (Reviewed in Reue & Zhang, 2008; Peterfy, Phan, Xu, & Reue, 2001). P: S99 phosphorylation site (a conserved residue with human Lipin 1 S106), NLS: nuclear localization signal, DXDXT: Asp-Xaa-Asp-Xaa-Thr catalytic motif, LXXIL: Leu-Xaa-Xaa-Ile-Leu transcriptional binding motif, blue box: a highly conserved domain near the amino-terminus of LPIN-1, green box: a highly conserved domain near the carboxy-terminus of LPIN-1. Bottom part: the comparison of worm LPIN-1, human Lipin 1, 2 and 3, mouse Lipin 1, 2 and 3, fly Lipin, and yeast Pah1. (B, C) Glucose feeding increased the nuclear localization of LPIN-1. Representative images of *gfp::lpin-1*-transgenic animals (B) and the semi-quantification of GFP::LPIN-1 nuclear localization (C) ( $n \geq 88$  from four experimental repeats, chi-squared test, \*  $p < 0.05$ ). Arrowheads indicate nuclear localized GFP::LPIN-1 signals. Scale bar: 100  $\mu\text{m}$ . Error bars represent standard error of the mean (SEM). The nuclear localization of GFP::LPIN-1 was classified into three groups (low: nuclear localization in less than 5 intestinal nuclei, intermediate: nuclear localization in more than 5 and less than 10 intestinal nuclei, high: nuclear localization in more than 10 intestinal nuclei). (D) Relative mRNA levels of *lpin-1* in *lpin-1(RNAi)* animals on control or glucose-rich diets. *lpin-1* RNAi significantly decreased the relative mRNA levels of *lpin-1*. Primers targeting *lpin-1* 3' UTR were used for measuring *lpin-1* mRNA levels. Error bars represent SEM ( $n = 4$ , two-tailed Student's *t*-test, \*\*\*  $p < 0.001$ , \*  $p < 0.05$ ). (E, F) *lpin-1* RNAi substantially decreased the level of GFP::LPIN-1. Representative images of *gfp::lpin-1* (E) and the quantification of GFP::LPIN-1 levels (F) ( $n \geq 38$  from 4 experimental repeats, two-tailed Student's *t*-test, \*\*\*  $p < 0.001$ ). Error bars represent SEM. Scale

bar: 100  $\mu\text{m}$ .



Figure S2

**A**

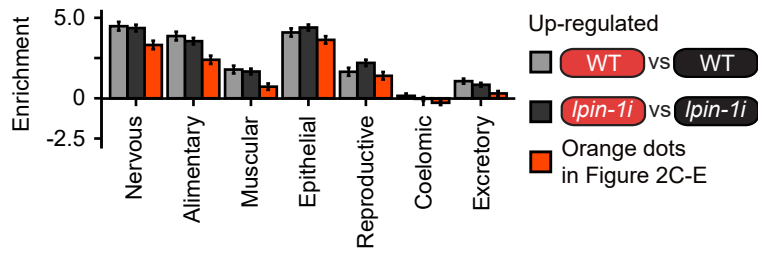

**B**

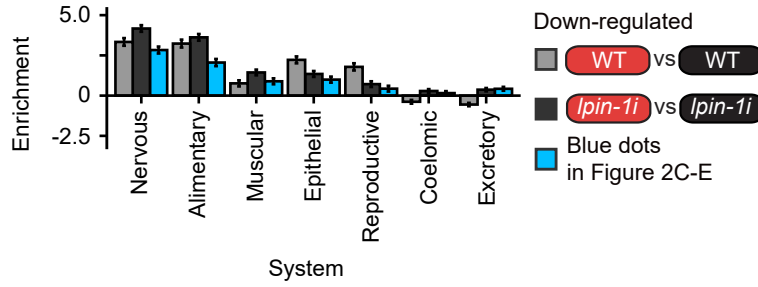

**Figure S2. *lpin-1* RNAi does not alter the effects of glucose-rich diets on the tissue enrichment of gene expression.** (A, B) Tissue-specific gene enrichment analysis among genes whose expression was up- (A) and down- (B) regulated by glucose-rich diet feeding in a *lpin-1*-dependent manner (orange dots and blue dots in Figure 2C-E, respectively) displayed similar results among various tissues. Enrichments were calculated by using hypergeometric test.

Figure S3

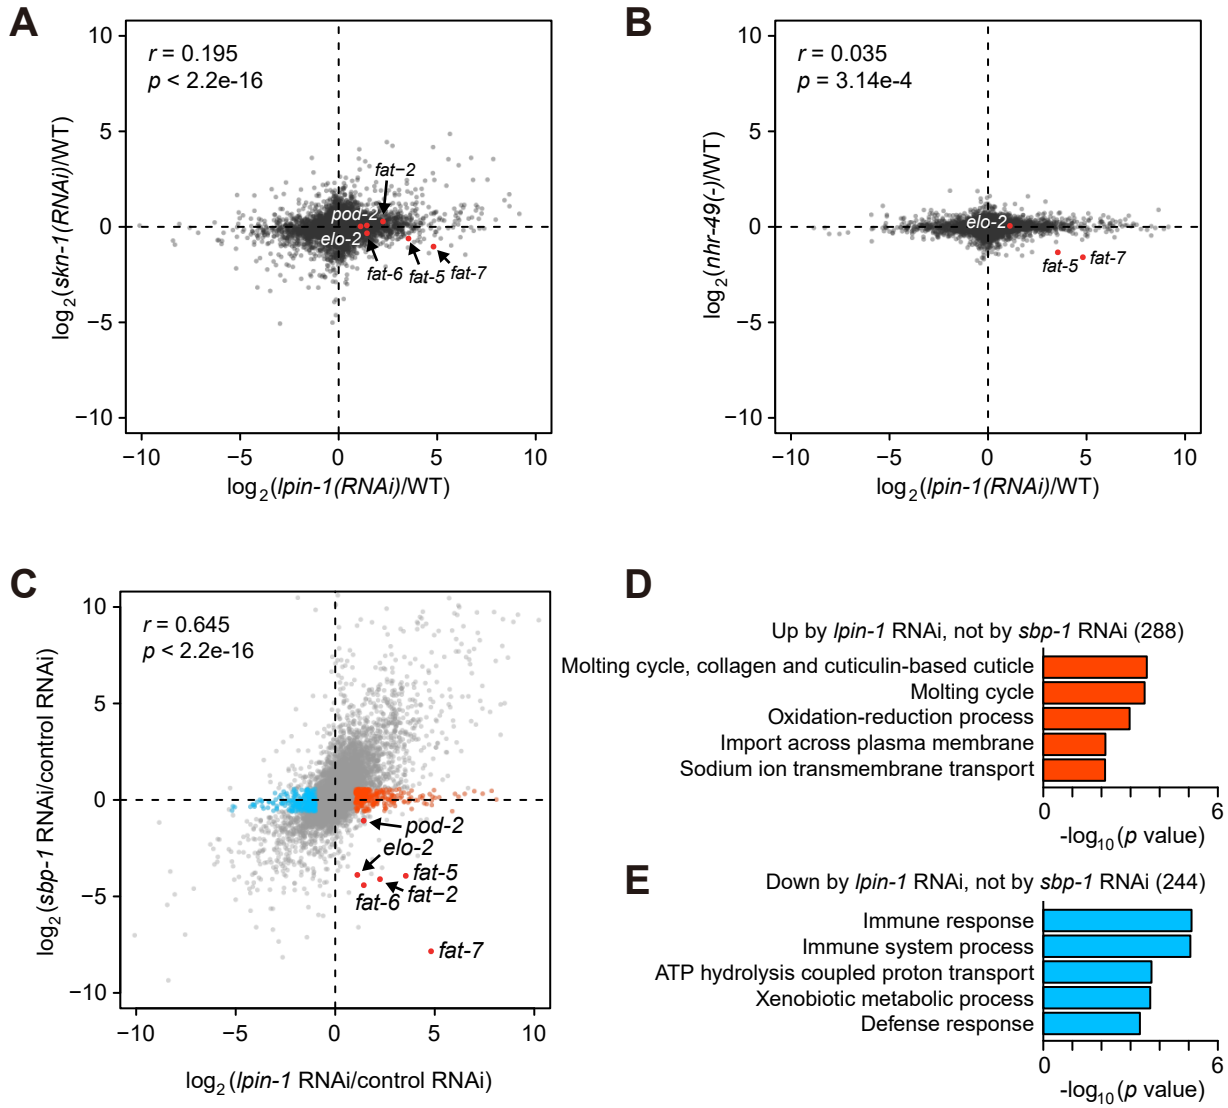

**Figure S3. Transcriptomic changes caused by *lpin-1* RNAi does not correlate with those caused by *skn-1* RNAi or *nhr-49* mutation.** (A, B) Scatter plots showing relationship between gene expression changes caused by *lpin-1*(RNAi) and those by *skn-1*(RNAi) (A) (Steinbaugh et al., 2015) and *nhr-49*(*nr2041*) [*nhr-49*(-)] mutations (B) (Pathare, Lin, Bornfeldt, Taubert, & Van Gilst, 2012). Red dots indicate known SBP-1/SREBP targets that regulate lipid metabolism. Pearson correlation coefficient ( $r$ ) and its significance ( $p$ ) are marked. (C) A scatter plot showing gene expression changes caused by *lpin-1*(RNAi), independently of *sbp-1*(RNAi) (Lee et al., 2015). Orange and blue dots indicate 288 genes up-regulated and 244 genes down-regulated by *lpin-1* RNAi (fold change > 2, Benjamini and Hochberg (BH)-adjusted  $p$  value < 0.05), respectively. These genes display small expression changes (absolute fold change < 1.5) in *sbp-1* RNAi-treated conditions. Pearson correlation coefficient ( $r$ ) and its significance ( $p$ ) are marked. (D, E) Overrepresented GO terms of the 288 up-regulated genes (D) and the 244 down-regulated genes (E) by *lpin-1* RNAi in an SBP-1-independent manner.

Figure S4

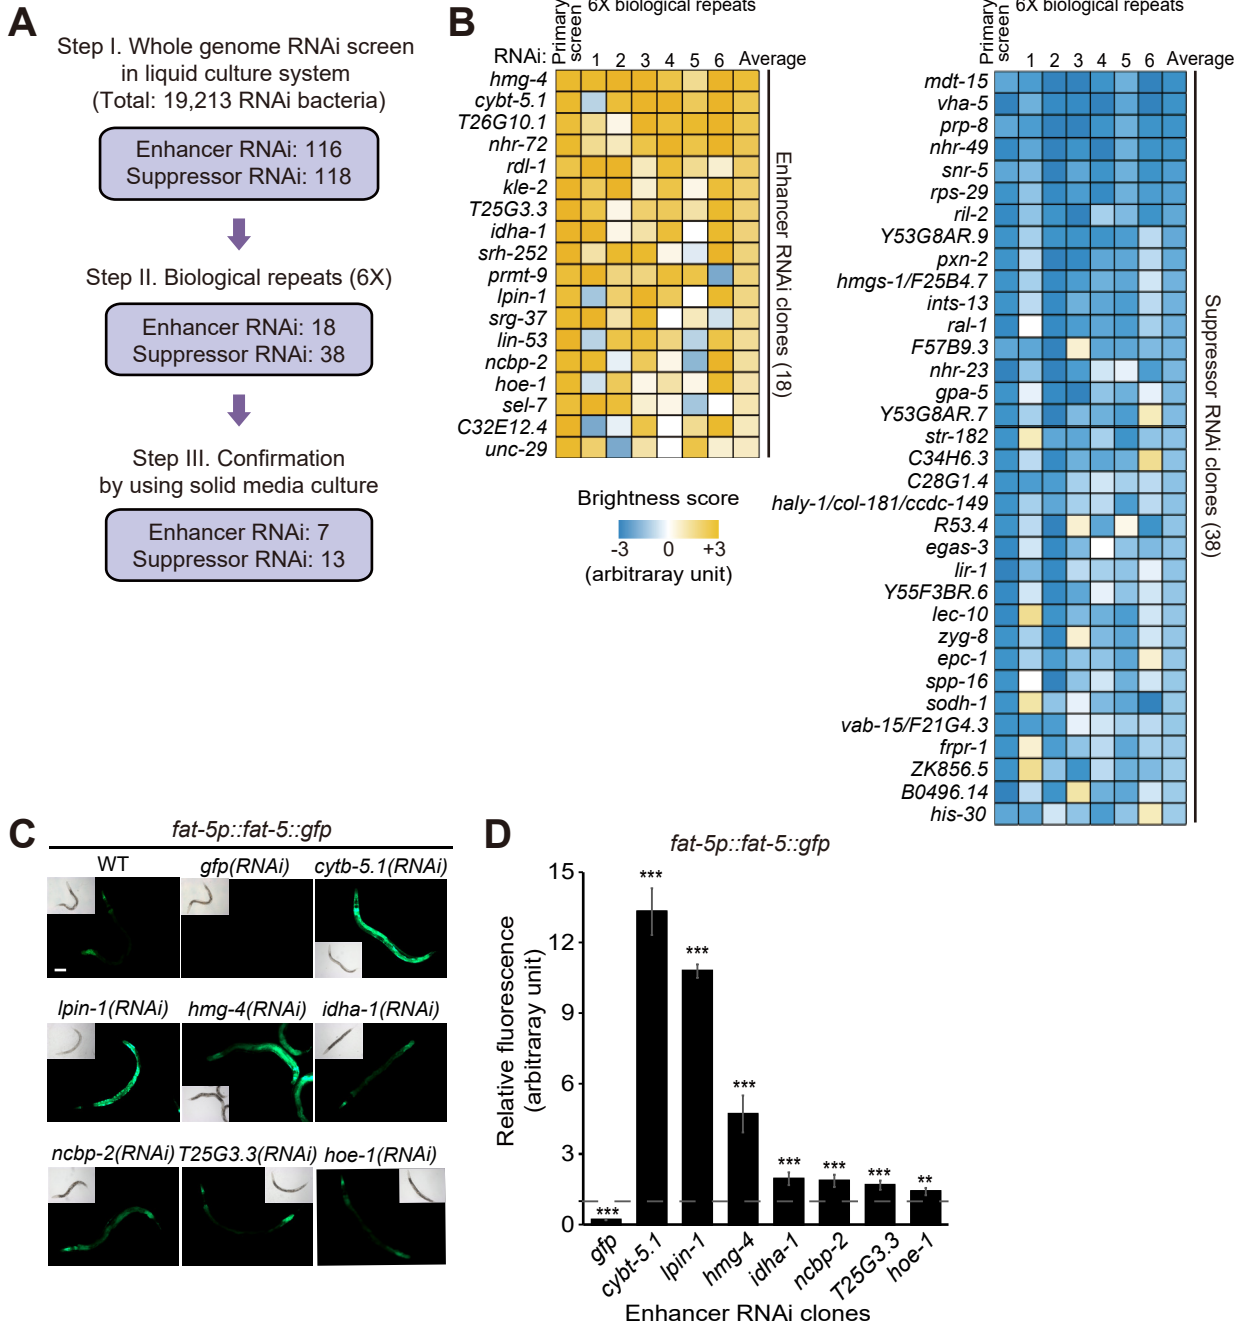

**Figure S4. A genome-wide RNAi screen using *fat-5p::fat-5::gfp*.** (A) Overview of a genome-wide RNAi screen using *fat-5p::fat-5::gfp* reporter. Step I. We initially identified 116 enhancer and 118 suppressor RNAi clones that respectively increased and decreased the fluorescence levels of the *fat-5p::fat-5::gfp* in a liquid culture system. Step II. After performing the fluorescence measurement experiments 6 more times, we narrowed down the candidates to 18 enhancer and 38 suppressor RNAi clones that reproducibly altered the *fat-5p::fat-5::gfp* levels (Tables S3 and S4). Step III. Among the 18 enhancer and the 33 suppressor RNAi clones that did not show developmental defects or L1 arrest on solid media, seven and thirteen RNAi clones significantly increased and decreased the expression of *fat-5p::fat-5::gfp*, respectively (Tables S3 and S4: written in bold). Cut-off scores for each step are described in the Experimental Procedures. (B) Liquid-culture based RNAi experiments that identified 18 enhancer and 38 suppressor RNAi clones that reproducibly altered the *fat-5p::fat-5::gfp* levels from six repeats (Tables S3 and S4). (C) Representative images of *fat-5p::fat-5::gfp* worms upon treating with each of seven enhancer RNAi clones that increased the fluorescence levels in solid culture system (*control(RNAi)*: WT, *gfp(RNAi)*: control that decreased the fluorescence level). Scale bar: 100  $\mu$ m. (D) The quantification of the GFP intensity in panel C ( $n \geq 23$  from three independent experimental sets, two-tailed Student's *t*-test, \*\*  $p < 0.01$ , \*\*\*  $p < 0.001$ ). Error bars represent standard error of the mean (SEM). Relative fluorescence levels were calculated by dividing the levels of fluorescence signals in specific RNAi-treated animals with those in WT worms.

Figure S5

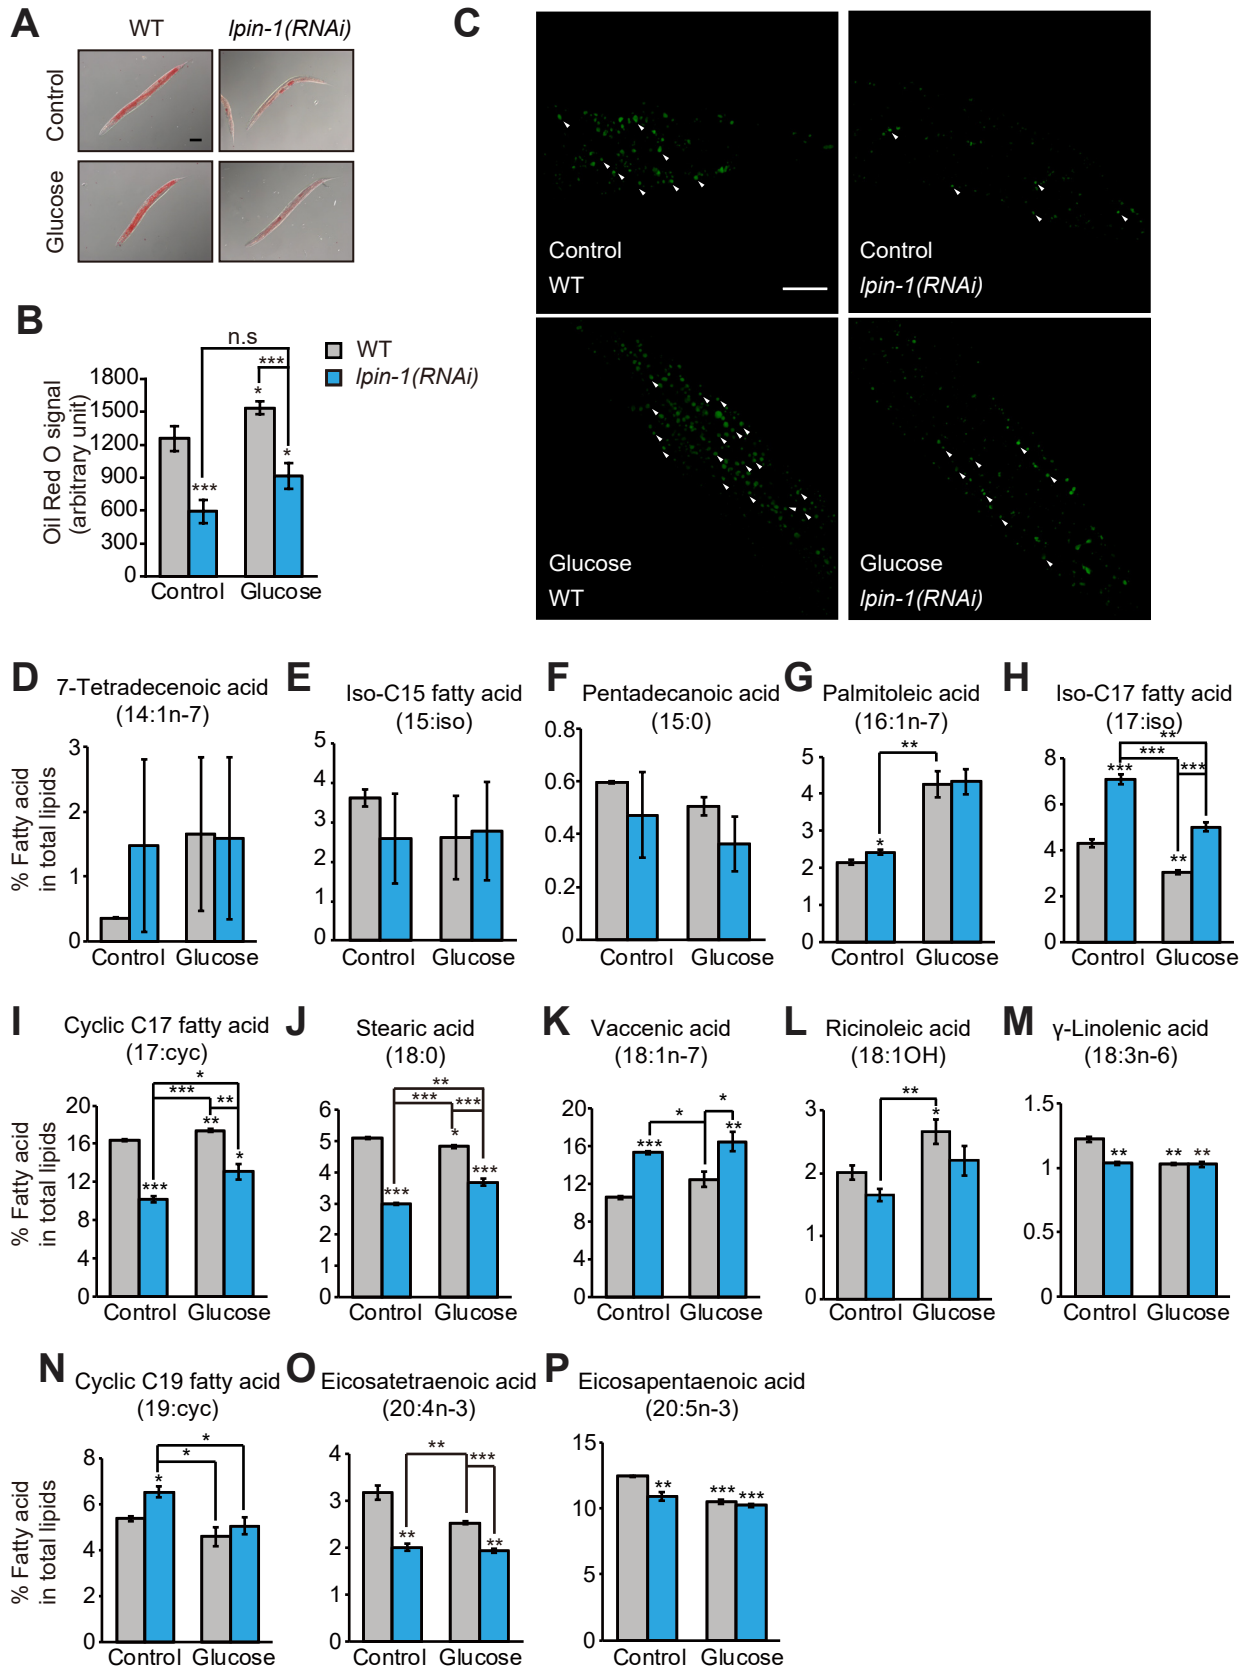

**Figure S5. Changes in lipid levels or fatty acid composition caused by *lpin-1* RNAi and dietary glucose.** (A, B) Oil red O staining of *control(RNAi)* (wild-type: WT) and *lpin-1(RNAi)* worms on control and glucose-rich diets. Representative images (A) and the quantification (B) of fat content levels in the intestine ( $n \geq 26$  from three independent experimental sets, two-tailed Student's *t*-test, \*  $p < 0.05$ , \*\*\*  $p < 0.001$ ). Error bars represent standard error of the mean (SEM). Scale bar: 100  $\mu\text{m}$ . (C) Confocal images of the tail part of fixed Nile red-stained WT and *lpin-1(RNAi)* worms on control and glucose-rich diets. *lpin-1* RNAi decreased the number of lipid droplets in worms on control and glucose-rich diets, but did not appear to alter the distribution of lipid droplets. Arrowheads indicate the lipid droplets. Scale bar: 20  $\mu\text{m}$ . (D-P) The levels of individual fatty acid in WT and *lpin-1(RNAi)* worms on control and glucose-rich diets. The levels of 7-tetradecenoic acid (14:1n-7) (D), iso-C15 fatty acid (15:iso) (E), pentadecanoic acid (15:0) (F), palmitoleic acid (16:1n-7) (G), iso-C17 fatty acid (17:iso) (H), cyclic C17 fatty acid (17:cyc) (I), stearic acid (18:0) (J), vaccenic acid (18:1n-7) (K), ricinoleic acid (18:1OH) (L),  $\gamma$ -linolenic acid (18:3n-6) (M), cyclic C19 fatty acid (19:cyc) (N), eicosatetraenoic acid (20:4n-3) (O), and eicosapentaenoic acid (20:5n-3) (P) ( $n = 3$ , two-tailed Student's *t*-test, \*  $p < 0.05$ , \*\*  $p < 0.01$ , \*\*\*  $p < 0.001$ ). Error bars represent SEM. See Figures 5F-5L for the levels of the other fatty acids that we measured and Table S5 for statistical analysis.



Figure S6

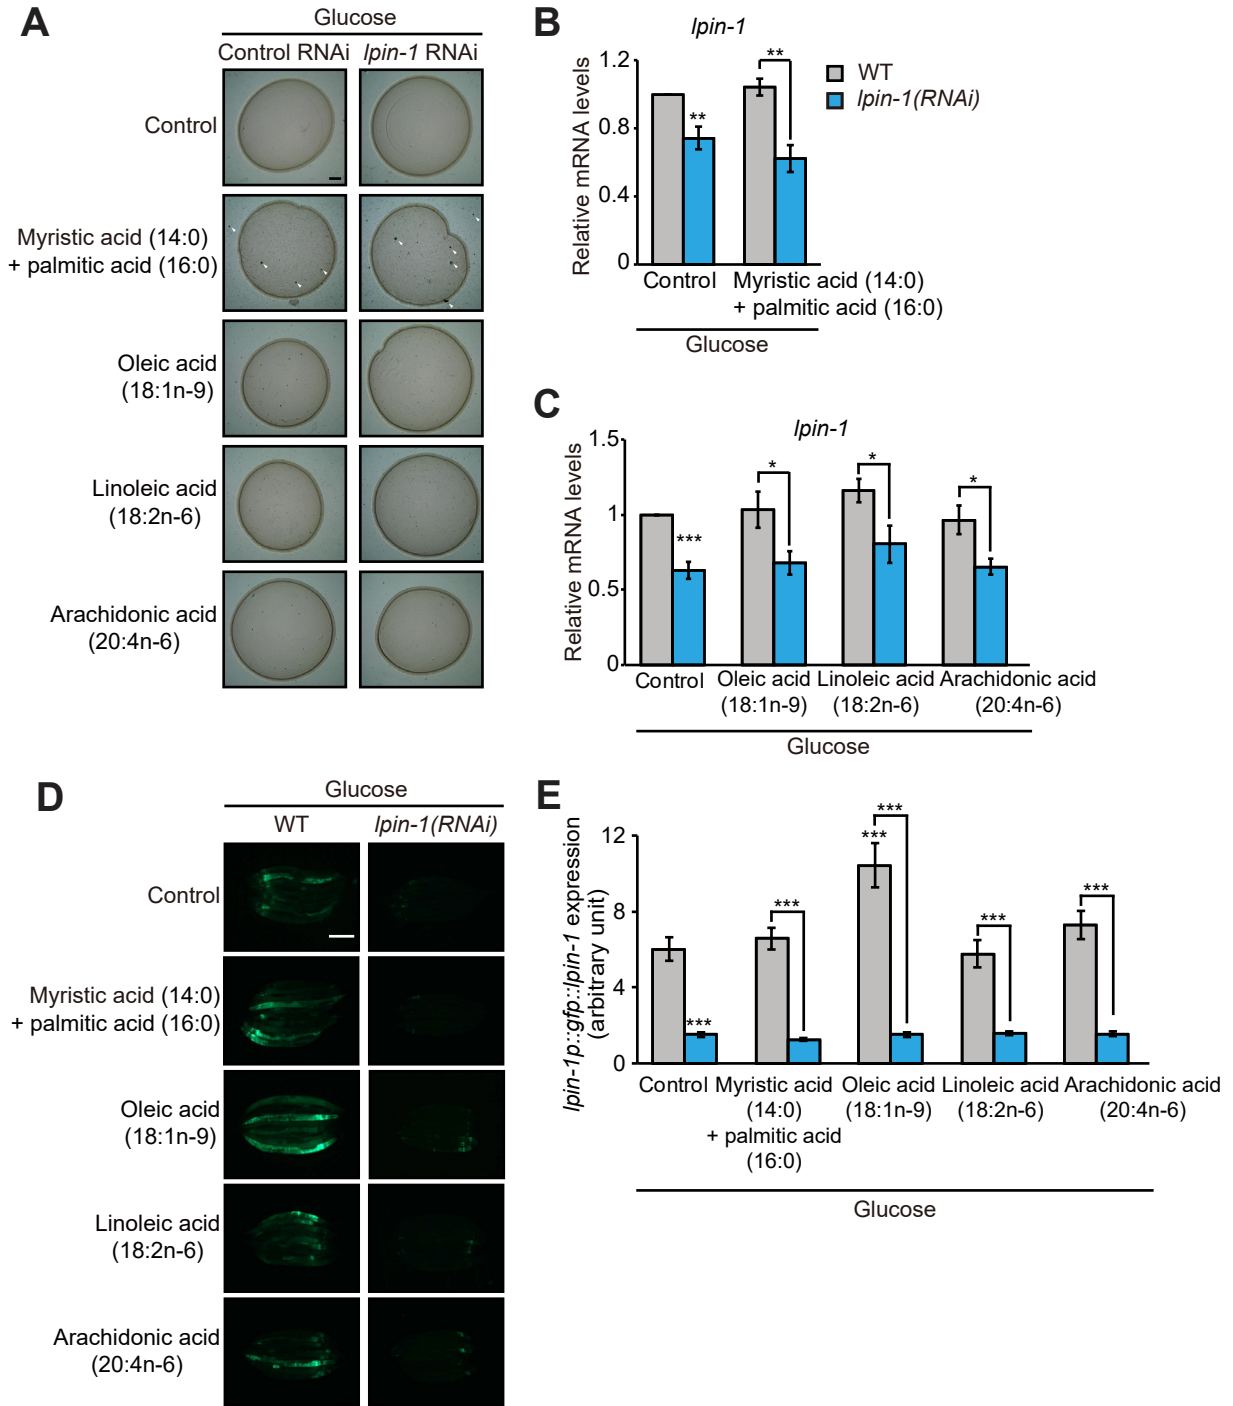

**Figure S6. The images of bacteria-seeded plates and *lpin-1* RNAi efficacy in various fatty acid-treated conditions.** (A) The images of empty vector control or *lpin-1* dsRNA-expressing bacteria-seeded plates containing indicated fatty acids. The *E. coli* lawn on a plate containing each of saturated fatty acid (SFA) mixture (myristic acid (14:0) and palmitic acid (16:0)), oleic acid (18:1n-9), linoleic acid (18:2n-6), and arachidonic acid (20:4n-6) appears to be similar to that on a control (ethanol) plate with additional 2% glucose treatments. One exception was crystal (arrowhead) formation caused by saturated fatty acid (SFA) mixture. We speculate that this may be caused by low solubility of SFAs (Khuwijitjaru, Adachi, & Matsuno, 2002). (B, C) *lpin-1* RNAi significantly decreased the mRNA levels of *lpin-1* in control (ethanol) and treatment with SFAs (myristic acid (14:0) and palmitic acid (16:0)) (B) (n = 5, two-tailed Student's *t*-test, \*\*  $p < 0.01$ ), oleic acid (18:1n-9), linoleic acid (18:2n-6) and arachidonic acid (20:4n-6) conditions (C) (n = 7 for control, oleic acid (18:1n-9) and linoleic acid (18:2n-6)-treated conditions; n = 6 for arachidonic acid (20:4n-6)-treated conditions, two-tailed Student's *t*-test, \*  $p < 0.05$ , \*\*\*  $p < 0.001$ ) with additional 2% glucose treatments (gray bar: WT (*control(RNAi)*), blue bar: *lpin-1(RNAi)*). Primers targeting the 5' UTR of *lpin-1* were used for the qRT-PCR for *lpin-1* mRNA. Error bars represent standard error of the mean (SEM). (D, E) *lpin-1(RNAi)* reduced the fluorescence intensity of GFP::LPIN-1 under glucose-rich conditions. Representative images (D) and quantification (E) of the GFP intensity (n ≥ 55 from 4 independent experimental sets, two-tailed Student's *t*-test, \*\*\*  $p < 0.001$ ). Error bars represent SEM. Scale bar: 200 μm.

Figure S7

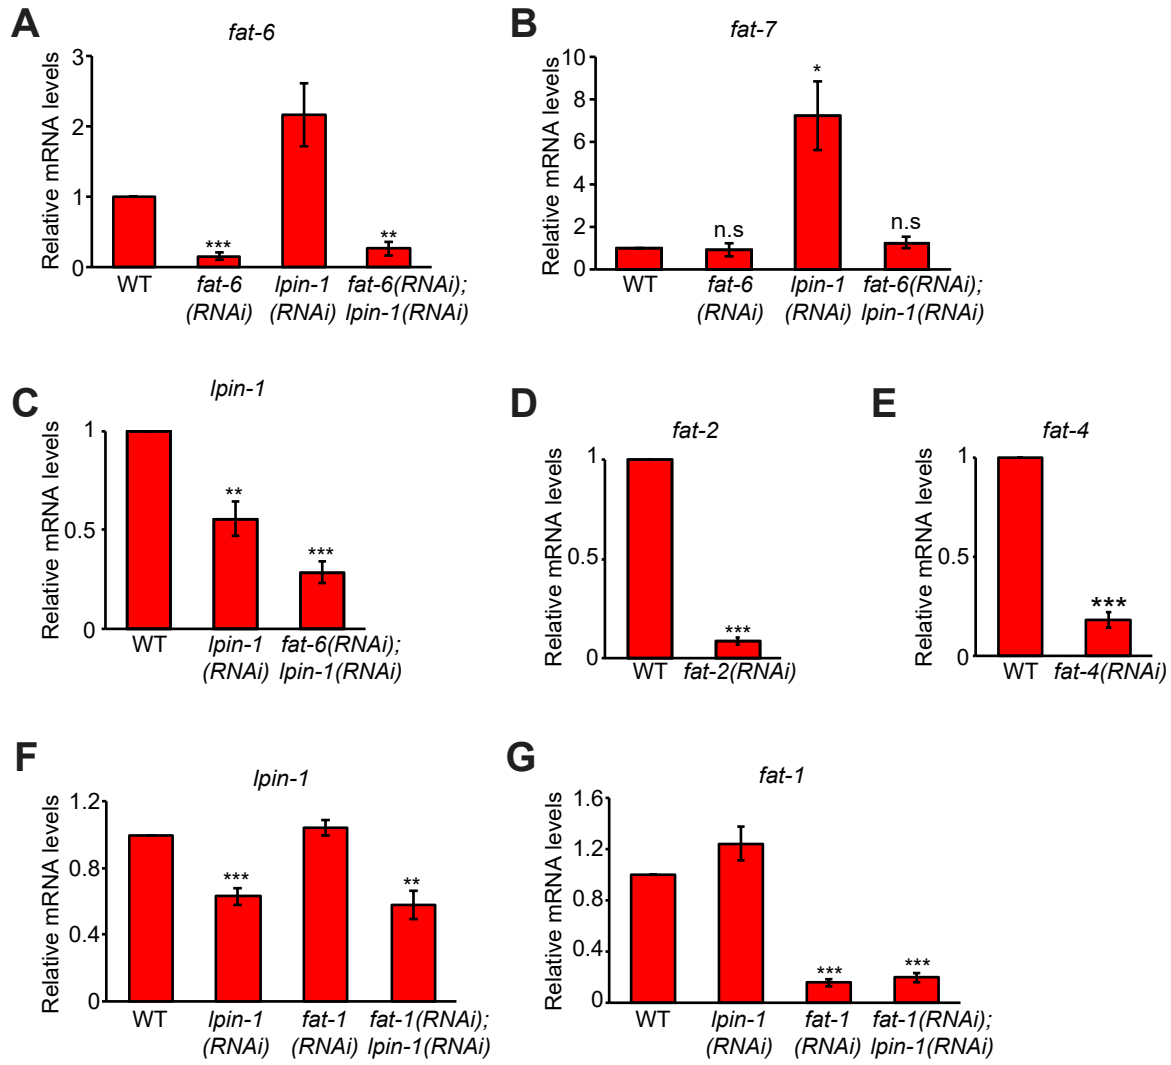

**Figure S7. Measurements of the efficiency of RNAi targeting *fat-1*, *fat-2*, *fat-4* or *fat-6* with or without *lpin-1* RNAi. (A, B)** Relative mRNA levels of *fat-6* and *fat-7* in WT (*control(RNAi)*) on glucose-rich diets. RNAi targeting *fat-6* significantly decreased the relative mRNA levels of *fat-6* (A), but did not significantly affect those of *fat-7* (B) (n = 3, two-tailed Student's *t*-test, \*\*\*  $p < 0.001$ , \*  $p < 0.05$ , n.s.: not significant). Although RNAi targeting *fat-6* is expected to target *fat-7* due to strong homology, the marginal effect of *fat-6* RNAi on *fat-7* mRNA levels is likely caused by the compensatory up-regulation of *fat-7* expression in response to genetic inhibition of *fat-6* (Brock, Browse, & Watts, 2006). Primers targeting the 3' UTR region of *fat-7* were used for *fat-7* mRNA qRT-PCR. (C) *lpin-1* RNAi efficacy in WT or *fat-6(RNAi)* animals. *lpin-1* RNAi significantly decreased the relative mRNA levels of *lpin-1* on glucose-rich diets. Primers targeting the 5' UTR of *lpin-1* were used for *lpin-1* mRNA qRT-PCR (n = 3, two-tailed Student's *t*-test, \*\*\*  $p < 0.001$ , \*\*  $p < 0.01$ ). (D, E) *fat-2* RNAi and *fat-4* RNAi significantly decreased the mRNA levels of *fat-2* (D) and *fat-4* (E), respectively, on glucose-rich diets. (n = 3, two-tailed Student's *t*-test, \*\*\*  $p < 0.001$ ). (F, G) Relative mRNA levels of *lpin-1* (F) and *fat-1* (G) in WT and *lpin-1(RNAi)* animals on glucose-rich diets. Treatment with *lpin-1* RNAi and *fat-1* RNAi significantly decreased the mRNA levels of *lpin-1* and *fat-1*, respectively (n = 4, two-tailed Student's *t*-test, \*\*\*  $p < 0.001$ , \*\*  $p < 0.01$ ). Error bars represent SEM.

Figure S8

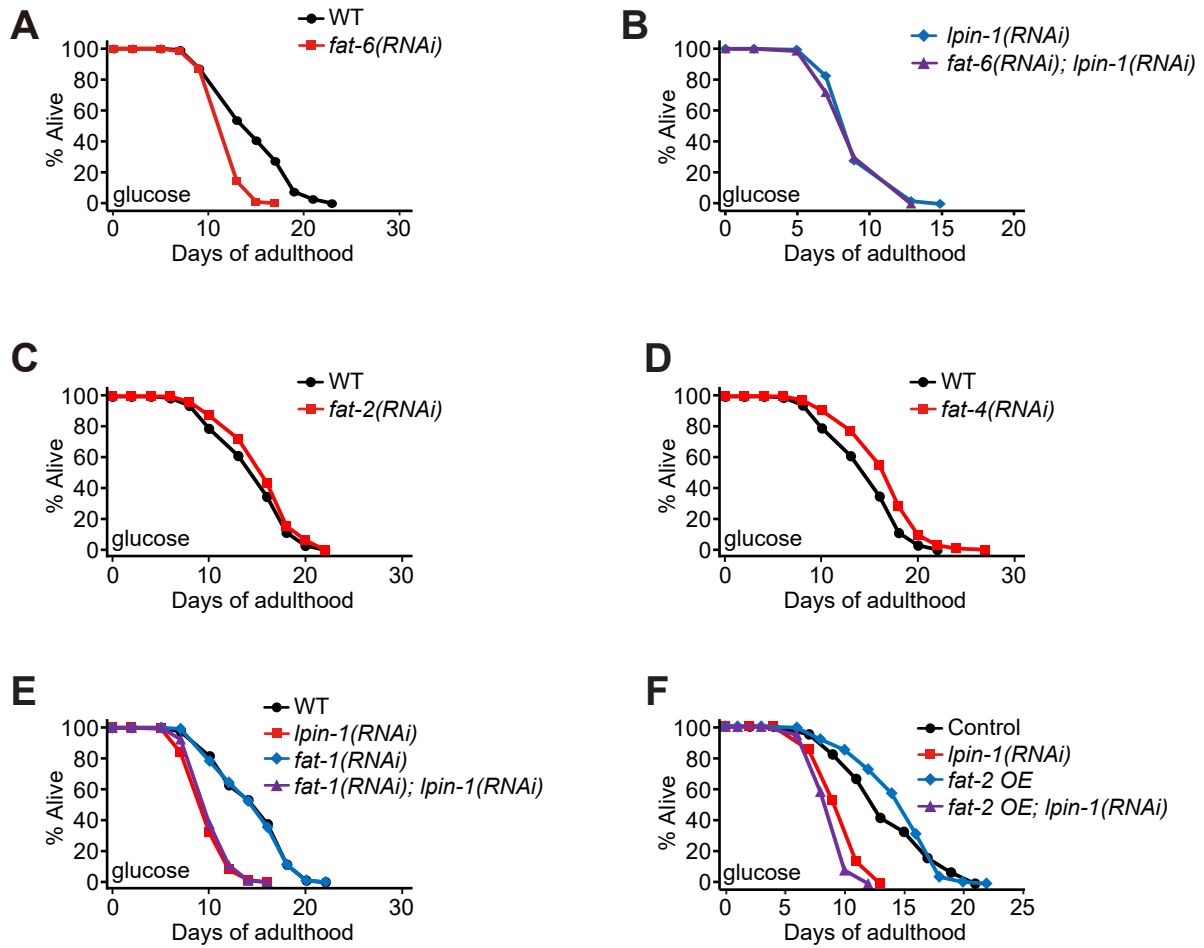

**Figure S8. The effects of RNAi targeting *fat-1*, *fat-2*, *fat-4* or *fat-6*, and *fat-2* overexpression with *lpin-1* RNAi on lifespan under glucose-rich conditions.** (A) RNAi targeting *fat-6* decreased the lifespan of glucose-fed worms. (B) *fat-6* RNAi did not further decrease the short lifespan of *lpin-1(RNAi)* in glucose-rich diet conditions. (C, D) RNAi targeting *fat-2*, which encodes a fatty acid desaturase that catalyzes the synthesis of linoleic acid (18:2n-6; Figure 4A), or *fat-4*, which encodes a fatty acid desaturase that catalyzes the synthesis of arachidonic acid (20:4n-6; Figure 4A), did not shorten lifespan on glucose-enriched diets. (E) Knockdown of *fat-1*, which encodes an enzyme required for synthesizing metabolites that are located upstream of  $\omega$ -6 PUFAs in fatty acid synthesis pathway (Figure 4A), did not change the lifespan of WT or *lpin-1(RNAi)* animals on glucose-rich diets. (F) Overexpression of *fat-2* did not restore the short lifespan of control (*odr-1p::rfp*) or *lpin-1(RNAi)* animals under glucose-rich conditions. See Table S7 for statistical analysis and additional repeats of the lifespan data shown in Figure S8.

## Supporting Tables

**Table S1. Summary of lifespan screen using *far-3p::gfp* enhancer RNAi clones.**

|    | Gene ID         | Gene name        | Description                                             | Average score from a genome-wide RNAi screen (Lee et al., 2015) | Lifespan Changes (%) |               |                     |
|----|-----------------|------------------|---------------------------------------------------------|-----------------------------------------------------------------|----------------------|---------------|---------------------|
|    |                 |                  |                                                         |                                                                 | Control diets        | Glucose diets | glucose specificity |
| 1  | <i>Y80D3A.5</i> | <i>cyp-42A1*</i> | Cytochrome P450 family                                  | 5.4                                                             | -25.0%               | -83.7%        | -58.7%              |
| 2  | <i>H37A05.1</i> | <i>lpin-1</i>    | Phosphatidate phosphatase Lipin 1, Lipin 2, and Lipin 3 | 5.0                                                             | -5.6%                | -45.8%        | -40.2%              |
| 3  | <i>F56B3.2</i>  | <i>F56B3.2</i>   | Unknown                                                 | 8.9                                                             | -27.6%               | -48.4%        | -20.8%              |
| 4  | <i>K06B4.4</i>  | <i>K06B4.4</i>   | Unknown                                                 | 5.3                                                             | 13.2%                | -7.2%         | -20.5%              |
| 5  | <i>ZK112.2</i>  | <i>ncl-1</i>     | Alpha of tripartite motif-containing protein 3          | 6.3                                                             | -7.6%                | -27.3%        | -19.7%              |
| 6  | <i>C12C8.3</i>  | <i>lin-41</i>    | Tripartite motif-containing protein 71                  | 8.3                                                             | -48.6%               | -66.9%        | -18.4%              |
| 7  | <i>W04G3.1</i>  | <i>lpr-6</i>     | Lipocalin-related protein                               | 4.8                                                             | 13.0%                | 3.0%          | -10.0%              |
| 8  | <i>C50B6.3</i>  | <i>C50B6.3</i>   | Unknown                                                 | 5.3                                                             | 2.9%                 | -6.8%         | -9.7%               |
| 9  | <i>C01C10.1</i> | <i>clc-2</i>     | Claudin-like in Caenorhabditis                          | 6.4                                                             | 5.6%                 | -2.2%         | -7.7%               |
| 10 | <i>F53B7.3</i>  | <i>F53B7.3</i>   | Pre-mRNA-splicing factor ISY1 homolog                   | 5.8                                                             | -20.7%               | -25.7%        | -5.0%               |

|    |                  |                  |                                                               |     |        |        |       |
|----|------------------|------------------|---------------------------------------------------------------|-----|--------|--------|-------|
| 11 | <i>M03F4.6</i>   | <i>M03F4.6</i>   | Unknown                                                       | 6.8 | -27.8% | -32.5% | -4.7% |
| 12 | <i>C18D11.3</i>  | <i>C18D11.3</i>  | Unknown                                                       | 4.8 | 1.5%   | -2.5%  | -4.0% |
| 13 | <i>Y76A2B.3</i>  | <i>acs-5</i>     | Fatty acid CoA synthetase                                     | 8.5 | 2.0%   | -0.9%  | -2.8% |
| 14 | <i>F31E3.1</i>   | <i>ceh-20</i>    | Pre-B-cell leukemia transcription factor 2                    | 4.8 | 5.9%   | 4.0%   | -2.0% |
| 15 | <i>T01C3.8</i>   | <i>mut-15</i>    | Mutator                                                       | 4.8 | 1.6%   | -0.3%  | -1.9% |
| 16 | <i>Y53F4B.14</i> | <i>Y53F4B.14</i> | Human PET100 ortholog (PET100 cytochrome c oxidase chaperone) | 5.0 | -3.5%  | -5.1%  | -1.6% |
| 17 | <i>R10D12.7</i>  | <i>R10D12.7</i>  | Unknown                                                       | 5.0 | 6.2%   | 4.6%   | -1.6% |
| 18 | <i>Y38C1BA.2</i> | <i>snn-1</i>     | Synapsin-2 isoform IIa                                        | 4.8 | 0.5%   | -0.6%  | -1.2% |
| 19 | <i>F32D1.10</i>  | <i>mcm-7</i>     | DNA replication licensing factor MCM7                         | 7.5 | -19.7% | -20.9% | -1.2% |
| 20 | <i>T01G9.6</i>   | <i>kin-10</i>    | Casein kinase II subunit beta                                 | 7.4 | -25.8% | -26.5% | -0.7% |
| 21 | <i>F48C1.1</i>   | <i>aman-3</i>    | Alpha-mannosidase 2                                           | 5.0 | -0.7%  | -1.1%  | -0.5% |
| 22 | <i>R74.3</i>     | <i>xbp-1</i>     | X-box-binding protein 1                                       | 4.8 | -12.7% | -10.3% | 2.4%  |
| 23 | <i>C01G10.1</i>  | <i>C01G10.1</i>  | Unknown                                                       | 5.0 | -2.7%  | 0.4%   | 3.1%  |
| 24 | <i>C47E12.4</i>  | <i>pyp-1</i>     | Inorganic pyrophosphatase                                     | 7.5 | -6.0%  | -2.8%  | 3.2%  |
| 25 | <i>T01E8.3</i>   | <i>plc-3</i>     | Phospholipase C gamma                                         | 6.4 | -41.3% | -37.4% | 3.9%  |
| 26 | <i>T23B5.1</i>   | <i>prmt-3</i>    | Protein arginine N-methyltransferase 10                       | 5.8 | -8.4%  | -1.9%  | 6.4%  |
| 27 | <i>C04B4.3</i>   | <i>lips-2</i>    | Lipase-related protein                                        | 4.8 | -5.9%  | 0.9%   | 6.8%  |



|    |                   |                 |                                                   |     |        |        |       |
|----|-------------------|-----------------|---------------------------------------------------|-----|--------|--------|-------|
| 28 | <i>F37E3.1</i>    | <i>ncbp-1</i>   | Nuclear cap-binding protein subunit 1             | 6.0 | -45.7% | -38.2% | 7.5%  |
| 29 | <i>C29H12.3</i>   | <i>rgs-3</i>    | Regulator of G-protein signaling 8                | 6.0 | -2.6%  | 5.4%   | 8.0%  |
| 30 | <i>R11A8.7</i>    | <i>R11A8.7</i>  | Ankyrin repeat and KH domain-containing protein 1 | 6.5 | -19.6% | -11.3% | 8.3%  |
| 31 | <i>T27B1.2</i>    | <i>ztf-19</i>   | Zinc finger protein 544                           | 5.5 | -22.2% | -10.1% | 12.1% |
| 32 | <i>T09E8.2</i>    | <i>him-17</i>   | High incidence of males                           | 4.9 | -4.5%  | 8.8%   | 13.3% |
| 33 | <i>T22D1.10</i>   | <i>ruvb-2</i>   | RuvB-like 2                                       | 5.6 | -19.7% | -5.4%  | 14.3% |
| 34 | <i>ZK858.4</i>    | <i>mel-26</i>   | Speckle-type POZ protein                          | 7.4 | 5.2%   | 20.0%  | 14.9% |
| 35 | <i>T12F5.4</i>    | <i>lin-59</i>   | Probable histone-lysine N-methyltransferase ASH1L | 5.0 | -49.4% | -33.8% | 15.6% |
| 36 | <i>T14B4.7</i>    | <i>dpy-10</i>   | Cuticle collagen protein                          | 6.8 | -14.5% | 1.5%   | 16.0% |
| 37 | <i>Y110A7A.11</i> | <i>use-1</i>    | Vesicle transport protein USE1                    | 5.6 | -44.7% | -28.4% | 16.3% |
| 38 | <i>C54G10.3</i>   | <i>pmp-3</i>    | ABC transporter                                   | 5.0 | -9.9%  | 6.8%   | 16.7% |
| 39 | <i>B0395.2</i>    | <i>mboa-1</i>   | Acyl-CoA:cholesterol ('sterol') O-acyltransferase | 6.6 | -0.2%  | 17.3%  | 17.5% |
| 40 | <i>H13N06.3</i>   | <i>gob-1</i>    | Trehalose-6-phosphatase                           | 7.3 | -49.8% | -32.2% | 17.5% |
| 41 | <i>F44B9.3</i>    | <i>cit-1.2</i>  | Cyclin-K                                          | 5.1 | -7.3%  | 10.6%  | 18.0% |
| 42 | <i>Y47G6A.20</i>  | <i>rnp-6</i>    | Poly(U)-binding-splicing factor PUF60             | 5.6 | -40.5% | -22.3% | 18.2% |
| 43 | <i>T19B10.2</i>   | <i>T19B10.2</i> | Unknown                                           | 6.1 | -19.6% | 2.4%   | 22.0% |

|    |                 |                 |                                                                    |     |        |        |       |
|----|-----------------|-----------------|--------------------------------------------------------------------|-----|--------|--------|-------|
| 44 | <i>F01F1.12</i> | <i>aldo-2</i>   | Fructose-bisphosphate aldolase                                     | 6.3 | -4.7%  | 17.6%  | 22.3% |
| 45 | <i>F30H5.1</i>  | <i>unc-45</i>   | Protein that contains an N-terminal TRP (tetratricopeptide repeat) | 6.4 | -30.8% | -8.2%  | 22.6% |
| 46 | <i>F29G9.4</i>  | <i>fos-1</i>    | Proto-oncogene c-Fos                                               | 6.1 | -40.0% | -16.7% | 23.3% |
| 47 | <i>K08A8.2</i>  | <i>sox-2</i>    | Transcription factor SOX-2                                         | 5.8 | -32.2% | -8.3%  | 24.0% |
| 48 | <i>F07A11.6</i> | <i>din-1</i>    | Msx2-interacting protein                                           | 4.8 | -5.7%  | 19.7%  | 25.5% |
| 49 | <i>C14B9.4</i>  | <i>plk-1</i>    | Serine/threonine-protein kinase PLK2                               | 6.3 | -29.4% | -2.2%  | 27.2% |
| 50 | <i>K12D12.1</i> | <i>top-2</i>    | DNA topoisomerase 2                                                | 5.8 | -33.4% | -6.2%  | 27.2% |
| 51 | <i>T20B12.3</i> | <i>T20B12.3</i> | Nucleolar complex protein 4 homolog                                | 6.3 | -26.7% | 4.0%   | 30.7% |
| 52 | <i>C27H6.2</i>  | <i>ruvb-1</i>   | RuvB-like 1                                                        | 5.2 | -33.5% | -1.2%  | 32.2% |
| 53 | <i>F26A10.2</i> | <i>F26A10.2</i> | MDS1 and EVI1 complex locus protein EVI1                           | 5.3 | -33.6% | 0.9%   | 34.5% |
| 54 | <i>T05G5.3</i>  | <i>cdk-1</i>    | Cyclin-dependent kinase                                            | 4.9 | -29.0% | 8.4%   | 37.4% |
| 55 | <i>K08E3.6</i>  | <i>cyk-4</i>    | Rac GTPase-activating protein 1                                    | 6.7 | -33.2% | 5.6%   | 38.7% |
| 56 | <i>T10F2.4</i>  | <i>prp-19</i>   | Pre-mRNA-processing factor 19                                      | 6.3 | -37.2% | 8.8%   | 46.0% |

Average scores from a genome-wide RNAi screen were calculated by dividing total scores made by three independent researchers with the number of counts (Lee et al., 2015). Among 170 enhancer RNAi clones, we selected 56 RNAi clones that had average scores over 4.8 for the lifespan screen.

Lifespan changes (%) indicate average lifespan changes calculated by comparing the lifespan of each RNAi-treated animals with that of

control RNAi-treated animals on control diets or on glucose-rich diets.

Lifespan assays were performed by at least two independent researchers.

Glucose specificity (%) was calculated by subtracting lifespan changes (%) on control diets from lifespan changes (%) on glucose diets.

The gene list was sorted by ascending order of glucose specificity (%).

\**cyp-42A1* was not initially included in enhancer RNAi clones (Lee et al., 2015) but instead *Y80D3A.6* RNAi was included. Because *Y80D3A.6* is predicted as a dead gene (based on WormBase (<https://wormbase.org/>)), we tested which gene was targeted by *Y80D3A.6* RNAi by using BLAST and subsequently found that a portion of *cyp-42A1* was targeted. Therefore, we substituted *Y80D3A.6* with *cyp-42A1*.

**Table S2. Lifespan screen data of *far-3p::gfp* enhancer RNAi-treated animals.**

| Trial | Strain/treatment                 | Mean lifespan<br>±SEM (days) | 75th percentile | % change <sup>A</sup>            | Number of<br>animals that<br>died/total | <i>p</i> value vs.<br>control                                   | Figures in text |
|-------|----------------------------------|------------------------------|-----------------|----------------------------------|-----------------------------------------|-----------------------------------------------------------------|-----------------|
| #1    | N2/Control RNAi                  | 20.6±0.6                     | 25              |                                  | 92/120                                  |                                                                 |                 |
|       | N2/Control RNAi glucose          | 13.2±0.4                     | 17              | -35.9%                           | 114/120                                 | <i>p</i> <0.0001                                                |                 |
|       | N2/ <i>pod-2</i> RNAi*           | 18.7±0.5                     | 23              | -9.6%                            | 82/120                                  | 0.0016                                                          |                 |
|       | N2/ <i>pod-2</i> RNAi glucose*   | 9.7±0.1                      | 13              | -53.0%<br>-26.7% (ctrl RNAi glc) | 114/120                                 | <i>p</i> <0.0001<br><i>p</i> <0.0001 <sup>(ctrl RNAi glc)</sup> |                 |
|       | N2/ <i>F56B3.2A</i> RNAi         | 14.7±0.4                     | 17              | -28.7%                           | 114/120                                 | <i>p</i> <0.0001                                                |                 |
|       | N2/ <i>F56B3.2A</i> RNAi glucose | 7.8±0.3                      | 11              | -62.1%<br>-40.9% (ctrl RNAi glc) | 92/120                                  | <i>p</i> <0.0001<br><i>p</i> <0.0001 <sup>(ctrl RNAi glc)</sup> |                 |
|       | N2/ <i>acs-5</i> RNAi            | 21.2±0.6                     | 27              | 3.0%                             | 86/120                                  | 0.2059                                                          |                 |
|       | N2/ <i>acs-5</i> RNAi glucose    | 12.9±0.3                     | 17              | -37.4%<br>-2.3% (ctrl RNAi glc)  | 105/120                                 | <i>p</i> <0.0001<br>0.282 <sup>(ctrl RNAi glc)</sup>            |                 |
|       | N2/ <i>lin-41</i> RNAi           | 9.7±0.3                      | 13              | -53.2%                           | 115/120                                 | <i>p</i> <0.0001                                                |                 |
|       | N2/ <i>lin-41</i> RNAi glucose   | 4.3±0.3                      | 7               | -79.3%<br>-67.6% (ctrl RNAi glc) | 57/62                                   | <i>p</i> <0.0001<br><i>p</i> <0.0001 <sup>(ctrl RNAi glc)</sup> |                 |

|    |                                  |          |    |                                  |         |                                                         |  |
|----|----------------------------------|----------|----|----------------------------------|---------|---------------------------------------------------------|--|
|    | N2/ <i>mcm-7</i> RNAi            | 17.7±0.6 | 23 | -14.4%                           | 64/100  | $p < 0.0001$                                            |  |
|    | N2/ <i>mcm-7</i> RNAi glucose    | 11.3±0.4 | 13 | -45.3%<br>-14.6% (ctrl RNAi glc) | 112/120 | $p < 0.0001$<br>0.0003 <sup>(ctrl RNAi glc)</sup>       |  |
|    | N2/ <i>kin-10</i> RNAi           | 14.9±0.3 | 17 | -27.9%                           | 93/120  | $p < 0.0001$                                            |  |
|    | N2/ <i>kin-10</i> RNAi glucose   | 9.2±0.2  | 11 | -55.2%<br>-30.1% (ctrl RNAi glc) | 112/120 | $p < 0.0001$<br>$p < 0.0001$ <sup>(ctrl RNAi glc)</sup> |  |
| #2 | N2/Control RNAi                  | 19.9±0.6 | 25 |                                  | 95/120  |                                                         |  |
|    | N2/Control RNAi glucose          | 14.2±0.4 | 18 | -28.6%                           | 105/120 | $p < 0.0001$                                            |  |
|    | N2/ <i>pod-2</i> RNAi*           | 20.4±0.6 | 25 | 2.3%                             | 69/120  | 0.7719                                                  |  |
|    | N2/ <i>pod-2</i> RNAi glucose*   | 9.8±0.2  | -  | -51.0%<br>-31.3% (ctrl RNAi glc) | 91/120  | $p < 0.0001$<br>$p < 0.0001$ <sup>(ctrl RNAi glc)</sup> |  |
|    | N2/ <i>F56B3.2A</i> RNAi         | 14.7±0.3 | 16 | -26.5%                           | 103/120 | $p < 0.0001$                                            |  |
|    | N2/ <i>F56B3.2A</i> RNAi glucose | 6.3±0.3  | 9  | -68.5%<br>-55.9% (ctrl RNAi glc) | 111/120 | $p < 0.0001$<br>$p < 0.0001$ <sup>(ctrl RNAi glc)</sup> |  |
|    | N2/ <i>acs-5</i> RNAi            | 20.1±0.5 | 23 | 1.0%                             | 81/120  | 0.9166                                                  |  |
|    | N2/ <i>acs-5</i> RNAi glucose    | 14.3±0.4 | 18 | -28.2%<br>0.6% (ctrl RNAi glc)   | 103/120 | $p < 0.0001$<br>0.7369 <sup>(ctrl RNAi glc)</sup>       |  |
|    | N2/ <i>lin-41</i> RNAi           | 11.2±0.3 | 14 | -43.9%                           | 89/120  | $p < 0.0001$                                            |  |

|    |                                |          |    |                                  |         |                                              |  |
|----|--------------------------------|----------|----|----------------------------------|---------|----------------------------------------------|--|
|    | N2/ <i>lin-41</i> RNAi glucose | 4.8±0.2  | 9  | -75.9%<br>-66.3% (ctrl RNAi glc) | 92/120  | $p < 0.0001$<br>$p < 0.0001$ (ctrl RNAi glc) |  |
|    | N2/ <i>mcm-7</i> RNAi          | 15±0.3   | 18 | -25.0%                           | 60/90   | $p < 0.0001$                                 |  |
|    | N2/ <i>mcm-7</i> RNAi glucose  | 10.4±0.4 | 12 | -48.0%<br>-27.1% (ctrl RNAi glc) | 102/120 | $p < 0.0001$<br>$p < 0.0001$ (ctrl RNAi glc) |  |
|    | N2/ <i>kin-10</i> RNAi         | 15.2±0.3 | 18 | -23.7%                           | 85/120  | $p < 0.0001$                                 |  |
|    | N2/ <i>kin-10</i> RNAi glucose | 11±0.2   | 14 | -45.0%<br>-23.0% (ctrl RNAi glc) | 84/120  | $p < 0.0001$<br>$p < 0.0001$ (ctrl RNAi glc) |  |
| #1 | N2/Control RNAi                | 20.1±0.4 | 23 |                                  | 114/150 |                                              |  |
|    | N2/Control RNAi glucose        | 15.5±0.3 | 18 | -23.1%                           | 112/150 | $p < 0.0001$                                 |  |
|    | N2/ <i>pyp-1</i> RNAi          | 18.7±0.4 | 23 | -6.8%                            | 110/150 | 0.0354                                       |  |
|    | N2/ <i>pyp-1</i> RNAi glucose  | 15.3±0.2 | 18 | -23.8%<br>-0.9% (ctrl RNAi glc)  | 119/150 | $p < 0.0001$<br>0.1344 (ctrl RNAi glc)       |  |
| #2 | N2/Control RNAi                | 19.9±0.5 | 25 |                                  | 89/120  |                                              |  |
|    | N2/Control RNAi glucose        | 16.1±0.3 | 20 | -19.1%                           | 113/150 | $p < 0.0001$                                 |  |
|    | N2/ <i>pyp-1</i> RNAi          | 18.6±0.5 | 23 | -6.6%                            | 101/120 | 0.0644                                       |  |
|    | N2/ <i>pyp-1</i> RNAi glucose  | 15.3±0.2 | 18 | -22.9%<br>-4.7% (ctrl RNAi glc)  | 138/150 | $p < 0.0001$<br>$p < 0.0001$ (ctrl RNAi glc) |  |

|    |                                 |          |    |                                  |         |                                          |  |
|----|---------------------------------|----------|----|----------------------------------|---------|------------------------------------------|--|
| #1 | N2/Control RNAi                 | 18.5±0.4 | 22 |                                  | 112/150 |                                          |  |
|    | N2/Control RNAi glucose         | 16.5±0.2 | 20 | -10.9%                           | 145/150 | $p<0.0001$                               |  |
|    | N2/ <i>F53B7.3</i> RNAi         | 15.6±0.3 | 20 | -16.0%                           | 75/131  | $p<0.0001$                               |  |
|    | N2/ <i>F53B7.3</i> RNAi glucose | 9.8±0.2  | 14 | -47.3%<br>-40.8% (ctrl RNAi glc) | 123/141 | $p<0.0001$<br>$p<0.0001$ (ctrl RNAi glc) |  |
| #2 | N2/Control RNAi                 | 20.8±0.5 | 24 |                                  | 109/150 |                                          |  |
|    | N2/Control RNAi glucose         | 16.9±0.3 | 20 | -18.9%                           | 87/150  | $p<0.0001$                               |  |
|    | N2/ <i>F53B7.3</i> RNAi         | 15.5±0.5 | 17 | -25.4%                           | 56/60   | $p<0.0001$                               |  |
|    | N2/ <i>F53B7.3</i> RNAi glucose | 15.1±0.3 | 20 | -27.4%<br>-10.5% (ctrl RNAi glc) | 80/150  | $p<0.0001$<br>$0.0001$ (ctrl RNAi glc)   |  |
| #1 | N2/Control RNAi                 | 20.3±0.4 | 24 |                                  | 90/100  |                                          |  |
|    | N2/Control RNAi glucose         | 15.1±0.4 | 18 | -25.8%                           | 34/100  | $p<0.0001$                               |  |
|    | N2/ <i>ceh-20</i> RNAi          | 22.4±0.3 | 24 | 10.0%                            | 89/100  | 0.0057                                   |  |
|    | N2/ <i>ceh-20</i> RNAi glucose  | 15.7±0.4 | 18 | -22.9%<br>3.8% (ctrl RNAi glc)   | 47/100  | $p<0.0001$<br>$0.2451$ (ctrl RNAi glc)   |  |
| #2 | N2/Control RNAi                 | 20.6±0.4 | 24 |                                  | 106/120 |                                          |  |
|    | N2/Control RNAi glucose         | 13.1±0.4 | 16 | -36.4%                           | 79/149  | $p<0.0001$                               |  |
|    | N2/ <i>ceh-20</i> RNAi          | 21±0.3   | 24 | 1.8%                             | 121/150 | 0.9218                                   |  |
|    | N2/ <i>ceh-20</i> RNAi glucose  | 13.7±0.3 | 16 | -33.8%                           | 117/150 | $p<0.0001$                               |  |

|    |                                 |          |    |                                             |         |                                                                 |  |
|----|---------------------------------|----------|----|---------------------------------------------|---------|-----------------------------------------------------------------|--|
|    |                                 |          |    | 4.1% <sup>(ctrl RNAi glc)</sup>             |         | 0.2445 <sup>(ctrl RNAi glc)</sup>                               |  |
| #1 | N2/Control RNAi                 | 23±0.6   | 29 |                                             | 90/120  |                                                                 |  |
|    | N2/Control RNAi glucose         | 11.8±0.3 | 14 | -48.9%                                      | 97/120  | <i>p</i> <0.0001                                                |  |
|    | N2/ <i>pod-2</i> RNAi*          | 18.5±0.4 | 22 | -19.5%                                      | 92/120  | <i>p</i> <0.0001                                                |  |
|    | N2/ <i>pod-2</i> RNAi glucose*  | 9.6±0.2  | 12 | -58.2%<br>-18.3% <sup>(ctrl RNAi glc)</sup> | 110/120 | <i>p</i> <0.0001<br><i>p</i> <0.0001 <sup>(ctrl RNAi glc)</sup> |  |
|    | N2/ <i>mel-26</i> RNAi          | 22.3±0.6 | 26 | -3.0%                                       | 95/120  | 0.4844                                                          |  |
|    | N2/ <i>mel-26</i> RNAi glucose  | 16.3±0.4 | 20 | -29.0%<br>38.8% <sup>(ctrl RNAi glc)</sup>  | 87/120  | <i>p</i> <0.0001<br><i>p</i> <0.0001 <sup>(ctrl RNAi glc)</sup> |  |
|    | N2/ <i>gob-1</i> RNAi           | 10.8±0.2 | 12 | -52.8%                                      | 94/120  | <i>p</i> <0.0001                                                |  |
|    | N2/ <i>gob-1</i> RNAi glucose   | 8±0.1    | 12 | -65.1%<br>-31.7% <sup>(ctrl RNAi glc)</sup> | 97/120  | <i>p</i> <0.0001<br><i>p</i> <0.0001 <sup>(ctrl RNAi glc)</sup> |  |
|    | N2/ <i>M03F4.6</i> RNAi         | 16±0.4   | 18 | -30.3%                                      | 87/120  | <i>p</i> <0.0001                                                |  |
|    | N2/ <i>M03F4.6</i> RNAi glucose | 8.6±0.2  | 12 | -62.4%<br>-26.6% <sup>(ctrl RNAi glc)</sup> | 54/120  | <i>p</i> <0.0001<br><i>p</i> <0.0001 <sup>(ctrl RNAi glc)</sup> |  |
|    | N2/ <i>dpy-10</i> RNAi          | 18.3±0.5 | 22 | -20.5%                                      | 77/120  | <i>p</i> <0.0001                                                |  |
|    | N2/ <i>dpy-10</i> RNAi glucose  | 12.4±0.3 | 14 | -46.3%<br>5.1% <sup>(ctrl RNAi glc)</sup>   | 95/120  | <i>p</i> <0.0001<br>0.132 <sup>(ctrl RNAi glc)</sup>            |  |



|    |                                 |          |    |                                  |        |                                                |  |
|----|---------------------------------|----------|----|----------------------------------|--------|------------------------------------------------|--|
|    | N2/ <i>cyk-4</i> RNAi           | 14.3±0.4 | 16 | -37.8%                           | 63/90  | $p < 0.0001$                                   |  |
|    | N2/ <i>cyk-4</i> RNAi glucose   | 14.2±0.5 | 16 | -38.3%<br>20.7% (ctrl RNAi glc)  | 65/90  | $p < 0.0001$<br>$p < 0.0001^{(ctrl RNAi glc)}$ |  |
| #2 | N2/Control RNAi                 | 23.5±0.6 | 26 |                                  | 78/120 |                                                |  |
|    | N2/Control RNAi glucose         | 15±0.5   | 18 | -36.3%                           | 61/120 | $p < 0.0001$                                   |  |
|    | N2/ <i>pod-2</i> RNAi*          | 21.2±0.5 | 24 | -10.0%                           | 81/120 | $p < 0.0001$                                   |  |
|    | N2/ <i>pod-2</i> RNAi glucose*  | 10.3±0.1 | 14 | -56.1%<br>-31.1% (ctrl RNAi glc) | 69/120 | $p < 0.0001$<br>$p < 0.0001^{(ctrl RNAi glc)}$ |  |
|    | N2/ <i>mel-26</i> RNAi          | 26.6±0.9 | 35 | 13.3%                            | 67/120 | 0.0005                                         |  |
|    | N2/ <i>mel-26</i> RNAi glucose  | 15.2±0.4 | 18 | -35.5%<br>1.3% (ctrl RNAi glc)   | 68/120 | $p < 0.0001$<br>0.633 (ctrl RNAi glc)          |  |
|    | N2/ <i>gob-1</i> RNAi           | 12.5±0.2 | 16 | -46.7%                           | 98/120 | $p < 0.0001$                                   |  |
|    | N2/ <i>gob-1</i> RNAi glucose   | 10.1±0.2 | 14 | -57.2%<br>-32.8% (ctrl RNAi glc) | 54/120 | $p < 0.0001$<br>$p < 0.0001^{(ctrl RNAi glc)}$ |  |
|    | N2/ <i>M03F4.6</i> RNAi         | 17.5±0.4 | 20 | -25.3%                           | 85/120 | $p < 0.0001$                                   |  |
|    | N2/ <i>M03F4.6</i> RNAi glucose | 9.2±0.5  | 12 | -60.8%<br>-38.4% (ctrl RNAi glc) | 73/120 | $p < 0.0001$<br>$p < 0.0001^{(ctrl RNAi glc)}$ |  |
|    | N2/ <i>dpy-10</i> RNAi          | 21.5±0.7 | 26 | -8.5%                            | 50/120 | 0.0578                                         |  |

|    |                                |          |    |                                  |         |                                                         |  |
|----|--------------------------------|----------|----|----------------------------------|---------|---------------------------------------------------------|--|
|    | N2/ <i>dpy-10</i> RNAi glucose | 14.6±0.3 | 18 | -37.7%<br>-2.1% (ctrl RNAi glc)  | 68/120  | $p < 0.0001$<br>0.4569 <sup>(ctrl RNAi glc)</sup>       |  |
|    | N2/ <i>cyk-4</i> RNAi          | 15.8±0.4 | 18 | -32.8%                           | 66/120  | $p < 0.0001$                                            |  |
|    | N2/ <i>cyk-4</i> RNAi glucose  | 14±0.4   | 18 | -40.4%<br>-6.5% (ctrl RNAi glc)  | 84/120  | $p < 0.0001$<br>0.1561 <sup>(ctrl RNAi glc)</sup>       |  |
| #1 | N2/Control RNAi                | 23.7±0.6 | 27 |                                  | 48/90   |                                                         |  |
|    | N2/Control RNAi glucose        | 15.7±0.4 | 19 | -33.9%                           | 69/117  | $p < 0.0001$                                            |  |
|    | N2/ <i>pod-2</i> RNAi*         | 20.7±0.6 | 25 | -12.8%                           | 77/117  | 0.0089                                                  |  |
|    | N2/ <i>pod-2</i> RNAi glucose* | 10.6±0.3 | 15 | -55.4%<br>-32.5% (ctrl RNAi glc) | 69/120  | $p < 0.0001$<br>$p < 0.0001$ <sup>(ctrl RNAi glc)</sup> |  |
|    | N2/ <i>unc-45</i> RNAi         | 17.5±0.8 | 21 | -26.2%                           | 31/77   | $p < 0.0001$                                            |  |
|    | N2/ <i>unc-45</i> RNAi glucose | 14.9±0.5 | 17 | -37.0%<br>-4.6% (ctrl RNAi glc)  | 82/120  | $p < 0.0001$<br>0.3692 <sup>(ctrl RNAi glc)</sup>       |  |
|    | N2/ <i>prp-19</i> RNAi         | 14±0.4   | 17 | -40.7%                           | 39/57   | $p < 0.0001$                                            |  |
|    | N2/ <i>prp-19</i> RNAi glucose | 16.1±0.3 | 19 | -32.0%<br>2.9% (ctrl RNAi glc)   | 100/120 | $p < 0.0001$<br>0.8698 <sup>(ctrl RNAi glc)</sup>       |  |
|    | N2/ <i>aldo-2</i> RNAi         | 23±0.6   | 27 | -3.0%                            | 60/120  | 0.3919                                                  |  |
|    | N2/ <i>aldo-2</i> RNAi glucose | 16.1±0.3 | 19 | -32.0%                           | 88/120  | $p < 0.0001$<br>0.8661 <sup>(ctrl RNAi)</sup>           |  |

|    |                                  |          |                      |                                  |         |                                              |
|----|----------------------------------|----------|----------------------|----------------------------------|---------|----------------------------------------------|
|    |                                  |          | 2.9% (ctrl RNAi glc) |                                  | glc)    |                                              |
|    | N2/ <i>T20B12.3</i> RNAi         | 18.8±0.7 | 23                   | -20.7%                           | 61/108  | 0.0001                                       |
|    | N2/ <i>T20B12.3</i> RNAi glucose | 16±0.5   | 21                   | -32.5%<br>2.1% (ctrl RNAi glc)   | 81/116  | $p < 0.0001$<br>0.2452 (ctrl RNAi glc)       |
|    | N2/ <i>ncl-1</i> RNAi            | 22.6±0.7 | 27                   | -4.6%                            | 49/120  | 0.5922                                       |
|    | N2/ <i>ncl-1</i> RNAi glucose    | 11.7±0.5 | 13                   | -50.4%<br>-25.0% (ctrl RNAi glc) | 63/115  | $p < 0.0001$<br>$p < 0.0001$ (ctrl RNAi glc) |
| #2 | N2/Control RNAi                  | 22.2±0.7 | 26                   |                                  | 87/120  |                                              |
|    | N2/Control RNAi glucose          | 12.8±0.4 | 16                   | -42.4%                           | 100/120 | $p < 0.0001$                                 |
|    | N2/ <i>pod-2</i> RNAi*           | 16.9±0.4 | 20                   | -23.8%                           | 99/120  | $p < 0.0001$                                 |
|    | N2/ <i>pod-2</i> RNAi glucose*   | 9.6±0.2  | 12                   | -56.6%<br>-24.6% (ctrl RNAi glc) | 105/120 | $p < 0.0001$<br>$p < 0.0001$ (ctrl RNAi glc) |
|    | N2/ <i>unc-45</i> RNAi           | 14.3±0.5 | 18                   | -35.4%                           | 76/100  | $p < 0.0001$                                 |
|    | N2/ <i>unc-45</i> RNAi glucose   | 11.3±0.4 | 12                   | -49.2%<br>-11.8% (ctrl RNAi glc) | 107/120 | $p < 0.0001$<br>0.0108 (ctrl RNAi glc)       |
|    | N2/ <i>T10F2.4</i> RNAi          | 13.5±0.3 | 16                   | -39.1%                           | 72/110  | $p < 0.0001$                                 |
|    | N2/ <i>T10F2.4</i> RNAi glucose  | 15.9±0.4 | 18                   | -28.1%<br>24.9% (ctrl RNAi glc)  | 108/120 | $p < 0.0001$<br>$p < 0.0001$ (ctrl RNAi glc) |

|    |                                  |          |    |                                  |         |                                            |  |
|----|----------------------------------|----------|----|----------------------------------|---------|--------------------------------------------|--|
|    | N2/ <i>aldo-2</i> RNAi           | 20.7±0.7 | 26 | -6.4%                            | 72/120  | 0.139                                      |  |
|    | N2/ <i>aldo-2</i> RNAi glucose   | 16.9±0.4 | 20 | -23.8%<br>32.3% (ctrl RNAi glc)  | 110/120 | $p<0.0001$<br>$p<0.0001^{(ctrl RNAi glc)}$ |  |
|    | N2/ <i>T20B12.3</i> RNAi         | 16.9±0.6 | 22 | -23.7%                           | 77/120  | $p<0.0001$                                 |  |
|    | N2/ <i>T20B12.3</i> RNAi glucose | 13.4±0.6 | 18 | -39.3%<br>5.4% (ctrl RNAi glc)   | 102/120 | $p<0.0001$<br>0.22 (ctrl RNAi glc)         |  |
|    | N2/ <i>ncl-1</i> RNAi            | 19.8±0.6 | 24 | -10.7%                           | 56/120  | 0.0039                                     |  |
|    | N2/ <i>ncl-1</i> RNAi glucose    | 9±0.3    | 10 | -59.5%<br>-29.6% (ctrl RNAi glc) | 114/120 | $p<0.0001$<br>$p<0.0001^{(ctrl RNAi glc)}$ |  |
| #1 | N2/Control RNAi                  | 18.5±0.6 | 23 |                                  | 93/120  |                                            |  |
|    | N2/Control RNAi glucose          | 12.6±0.4 | 17 | -32.0%                           | 120/120 | $p<0.0001$                                 |  |
|    | N2/ <i>pod-2</i> RNAi*           | 17.7±0.5 | 21 | -4.7%                            | 75/120  | 0.1194                                     |  |
|    | N2/ <i>pod-2</i> RNAi glucose*   | 8.9±0.1  | 13 | -52.0%<br>-29.4% (ctrl RNAi glc) | 117/120 | $p<0.0001$<br>$p<0.0001^{(ctrl RNAi glc)}$ |  |
|    | N2/ <i>mboa-1</i> RNAi           | 19.8±0.6 | 23 | 6.9%                             | 82/120  | 0.2001                                     |  |
|    | N2/ <i>mboa-1</i> RNAi glucose   | 15.2±0.3 | 17 | -18.0%<br>20.6% (ctrl RNAi glc)  | 110/120 | $p<0.0001$<br>$p<0.0001^{(ctrl RNAi glc)}$ |  |
|    | N2/ <i>R11A8.7</i> RNAi          | 16.3±0.3 | 19 | -12.0%                           | 77/120  | 0.0002                                     |  |
|    | N2/ <i>R11A8.7</i> RNAi glucose  | 10.8±0.3 | 13 | -41.7%                           | 118/120 | $p<0.0001$                                 |  |

|    |                                 |          |                        |                                  |                        |                                              |
|----|---------------------------------|----------|------------------------|----------------------------------|------------------------|----------------------------------------------|
|    |                                 |          | -14.3% (ctrl RNAi glc) |                                  | 0.0002 (ctrl RNAi glc) |                                              |
|    | N2/ <i>clc-2</i> RNAi           | 19.9±0.8 | 23                     | 7.5%                             | 69/90                  | 0.0854                                       |
|    | N2/ <i>clc-2</i> RNAi glucose   | 12.4±0.4 | 15                     | -33.3%<br>-1.9% (ctrl RNAi glc)  | 118/120                | $p < 0.0001$<br>0.7025 (ctrl RNAi glc)       |
|    | N2/ <i>plc-3</i> RNAi           | 10.8±0.3 | 13                     | -42.0%                           | 40/120                 | $p < 0.0001$                                 |
|    | N2/ <i>plc-3</i> RNAi glucose   | 7.7±0.2  | 11                     | -58.6%<br>-39.0% (ctrl RNAi glc) | 120/120                | $p < 0.0001$<br>$p < 0.0001$ (ctrl RNAi glc) |
| #2 | N2/Control RNAi                 | 20.3±0.9 | 25                     |                                  | 75/90                  |                                              |
|    | N2/Control RNAi glucose         | 13.3±0.4 | 17                     | -34.7%                           | 116/120                | $p < 0.0001$                                 |
|    | N2/ <i>pod-2</i> RNAi*          | 19.4±0.5 | 22                     | -4.5%                            | 79/90                  | 0.1194                                       |
|    | N2/ <i>pod-2</i> RNAi glucose*  | 8.9±0.1  | 13                     | -56.1%<br>-32.9% (ctrl RNAi glc) | 112/120                | $p < 0.0001$<br>$p < 0.0001$ (ctrl RNAi glc) |
|    | N2/ <i>mboa-1</i> RNAi          | 18.9±0.5 | 22                     | -7.3%                            | 107/120                | 0.2001                                       |
|    | N2/ <i>mboa-1</i> RNAi glucose  | 15.2±0.3 | 17                     | -25.5%<br>14.0% (ctrl RNAi glc)  | 115/120                | $p < 0.0001$<br>$p < 0.0001$ (ctrl RNAi glc) |
|    | N2/ <i>R11A8.7</i> RNAi         | 14.8±0.3 | 17                     | -27.1%                           | 103/120                | 0.0002                                       |
|    | N2/ <i>R11A8.7</i> RNAi glucose | 12.2±0.4 | 15                     | -40.1%<br>-8.3% (ctrl RNAi glc)  | 112/120                | $p < 0.0001$<br>0.0002 (ctrl RNAi glc)       |

|    |                                |          |    |                                  |         |                                                     |  |
|----|--------------------------------|----------|----|----------------------------------|---------|-----------------------------------------------------|--|
|    | N2/ <i>clc-2</i> RNAi          | 21.1±0.8 | 28 | 3.7%                             | 93/120  | 0.0854                                              |  |
|    | N2/ <i>clc-2</i> RNAi glucose  | 13±0.4   | 17 | -36.2%<br>-2.4% (ctrl RNAi glc)  | 113/120 | $p<0.0001$<br>0.7025 <sup>(ctrl RNAi glc)</sup>     |  |
|    | N2/ <i>plc-3</i> RNAi          | 12.1±0.4 | 15 | -40.6%                           | 36/120  | $p<0.0001$                                          |  |
|    | N2/ <i>plc-3</i> RNAi glucose  | 8.5±0.3  | 11 | -58.0%<br>-35.7% (ctrl RNAi glc) | 55/60   | $p<0.0001$<br>$p<0.0001$ <sup>(ctrl RNAi glc)</sup> |  |
| #1 | N2/Control RNAi                | 22.8±0.6 | 26 |                                  | 75/120  |                                                     |  |
|    | N2/Control RNAi glucose        | 13.7±0.3 | 17 | -40.0%                           | 88/120  | $p<0.0001$                                          |  |
|    | N2/ <i>pod-2</i> RNAi*         | 22.8±0.7 | 28 | 0.0%                             | 64/90   | 0.7737                                              |  |
|    | N2/ <i>pod-2</i> RNAi glucose* | 11.6±0.2 | 14 | -49.3%<br>-15.5% (ctrl RNAi glc) | 93/120  | $p<0.0001$<br>$p<0.0001$ <sup>(ctrl RNAi glc)</sup> |  |
|    | N2/ <i>ncbp-1</i> RNAi         | 13.4±0.3 | 17 | -41.2%                           | 40/90   | $p<0.0001$                                          |  |
|    | N2/ <i>ncbp-1</i> RNAi glucose | 9.5±0.3  | 12 | -58.4%<br>-30.8% (ctrl RNAi glc) | 88/116  | $p<0.0001$<br>$p<0.0001$ <sup>(ctrl RNAi glc)</sup> |  |
|    | N2/ <i>rgs-3</i> RNAi          | 22.1±0.7 | 26 | -3.2%                            | 67/120  | 0.5958                                              |  |
|    | N2/ <i>rgs-3</i> RNAi glucose  | 13.9±0.4 | 17 | -39.0%<br>1.7% (ctrl RNAi glc)   | 89/120  | $p<0.0001$<br>0.5271 <sup>(ctrl RNAi glc)</sup>     |  |
|    | N2/ <i>sox-2</i> RNAi          | 16.7±0.4 | 19 | -26.8%                           | 60/120  | $p<0.0001$                                          |  |

|    |                                |          |    |                                   |         |                                                         |  |
|----|--------------------------------|----------|----|-----------------------------------|---------|---------------------------------------------------------|--|
|    | N2/ <i>sox-2</i> RNAi glucose  | 13.8±0.3 | 17 | -39.5%<br>0.8% (ctrl RNAi glc)    | 74/120  | $p < 0.0001$<br>0.9209 <sup>(ctrl RNAi glc)</sup>       |  |
|    | N2/ <i>prmt-3</i> RNAi         | 21±0.6   | 26 | -8.0%                             | 81/120  | 0.0628                                                  |  |
|    | N2/ <i>prmt-3</i> RNAi glucose | 13±0.3   | 17 | -43.1%<br>-5.2% (ctrl RNAi glc)   | 101/120 | $p < 0.0001$<br>0.247 <sup>(ctrl RNAi glc)</sup>        |  |
|    | N2/ <i>top-2</i> RNAi          | 16.7±0.5 | 19 | -26.6%                            | 31/63   | $p < 0.0001$                                            |  |
|    | N2/ <i>top-2</i> RNAi glucose  | 14.9±0.5 | 19 | -34.8%<br>8.7% (ctrl RNAi glc)    | 91/120  | $p < 0.0001$<br>0.0124 <sup>(ctrl RNAi glc)</sup>       |  |
| #2 | N2/Control RNAi                | 25.1±0.8 | 30 |                                   | 55/120  |                                                         |  |
|    | N2/Control RNAi glucose        | 16.5±0.5 | 20 | -34.2%                            | 44/90   | $p < 0.0001$                                            |  |
|    | N2/ <i>pod-2</i> RNAi*         | 23.3±0.8 | 30 | -7.1%                             | 82/120  | 0.1045                                                  |  |
|    | N2/ <i>pod-2</i> RNAi glucose* | 12.3±0.4 | 15 | -51.0 %<br>-25.5% (ctrl RNAi glc) | 91/120  | $p < 0.0001$<br>$p < 0.0001$ <sup>(ctrl RNAi glc)</sup> |  |
|    | N2/ <i>ncbp-1</i> RNAi         | 12.5±0.4 | 15 | -50.1%                            | 57/98   | $p < 0.0001$                                            |  |
|    | N2/ <i>ncbp-1</i> RNAi glucose | 9±0.3    | 11 | -64.2%<br>-45.6% (ctrl RNAi glc)  | 81/105  | $p < 0.0001$<br>$p < 0.0001$ <sup>(ctrl RNAi glc)</sup> |  |
|    | N2/ <i>rgs-3</i> RNAi          | 24.6±1   | 30 | -2.0%                             | 55/120  | 0.7921                                                  |  |
|    | N2/ <i>rgs-3</i> RNAi glucose  | 18±0.4   | 22 | -28.2%                            | 61/120  | $p < 0.0001$<br>0.0313 <sup>(ctrl RNAi)</sup>           |  |

|    |                                |          |                      |                                  |        |                                                                 |
|----|--------------------------------|----------|----------------------|----------------------------------|--------|-----------------------------------------------------------------|
|    |                                |          | 9.1% (ctrl RNAi glc) |                                  | glc)   |                                                                 |
|    | N2/ <i>sox-2</i> RNAi          | 16.2±0.5 | 20                   | -35.3%                           | 55/111 | <i>p</i> <0.0001                                                |
|    | N2/ <i>sox-2</i> RNAi glucose  | 14.8±0.3 | 17                   | -41.3%<br>-10.7% (ctrl RNAi glc) | 62/120 | <i>p</i> <0.0001<br>0.0068 <sup>(ctrl RNAi glc)</sup>           |
|    | N2/ <i>prmt-3</i> RNAi         | 22.9±0.9 | 28                   | -8.7%                            | 59/120 | 0.1647                                                          |
|    | N2/ <i>prmt-3</i> RNAi glucose | 16.7±0.5 | 22                   | -33.3%<br>1.3% (ctrl RNAi glc)   | 68/120 | <i>p</i> <0.0001<br>0.7718 <sup>(ctrl RNAi glc)</sup>           |
|    | N2/ <i>top-2</i> RNAi          | 16.9±0.6 | 20                   | -32.8%                           | 42/69  | <i>p</i> <0.0001                                                |
|    | N2/ <i>top-2</i> RNAi glucose  | 15.3±0.6 | 20                   | -39.0%<br>-7.3% (ctrl RNAi glc)  | 71/120 | <i>p</i> <0.0001<br>0.2472 <sup>(ctrl RNAi glc)</sup>           |
| #1 | N2/Control RNAi                | 25±0.7   | 28                   |                                  | 78/120 |                                                                 |
|    | N2/Control RNAi glucose        | 15.9±0.5 | 20                   | -36.6%                           | 51/120 | <i>p</i> <0.0001                                                |
|    | N2/ <i>pod-2</i> RNAi*         | 25.5±0.6 | 30                   | 2.0%                             | 89/120 | 0.9634                                                          |
|    | N2/ <i>pod-2</i> RNAi glucose* | 12.9±0.3 | 15                   | -48.5%<br>-18.8% (ctrl RNAi glc) | 55/120 | <i>p</i> <0.0001<br><i>p</i> <0.0001 <sup>(ctrl RNAi glc)</sup> |
|    | N2/ <i>ruvb-2</i> RNAi         | 18.4±0.5 | 22                   | -26.6%                           | 95/120 | <i>p</i> <0.0001                                                |
|    | N2/ <i>ruvb-2</i> RNAi glucose | 16.5±0.6 | 20                   | -33.9%<br>4.2% (ctrl RNAi glc)   | 48/120 | <i>p</i> <0.0001<br>0.2398 <sup>(ctrl RNAi glc)</sup>           |



|    |                                |          |    |                                  |         |                                                     |  |
|----|--------------------------------|----------|----|----------------------------------|---------|-----------------------------------------------------|--|
|    | N2/ <i>rmp-6</i> RNAi          | 14.1±0.6 | 17 | -43.6%                           | 28/49   | $p<0.0001$                                          |  |
|    | N2/ <i>rmp-6</i> RNAi glucose  | 13.4±0.3 | 15 | -46.3%<br>-15.3% (ctrl RNAi glc) | 76/120  | $p<0.0001$<br>0.0002 <sup>(ctrl RNAi glc)</sup>     |  |
|    | N2/ <i>use-1</i> RNAi          | 12.6±0.3 | 15 | -49.5%                           | 60/80   | $p<0.0001$                                          |  |
|    | N2/ <i>use-1</i> RNAi glucose  | 12±0.3   | 15 | -51.9%<br>-24.1% (ctrl RNAi glc) | 100/120 | $p<0.0001$<br>$p<0.0001$ <sup>(ctrl RNAi glc)</sup> |  |
|    | N2/ <i>ztf-19</i> RNAi         | 19.1±0.8 | 22 | -23.7%                           | 34/104  | $p<0.0001$                                          |  |
|    | N2/ <i>ztf-19</i> RNAi glucose | 14.6±0.5 | 17 | -41.6%<br>-7.9% (ctrl RNAi glc)  | 71/120  | $p<0.0001$<br>0.1057 <sup>(ctrl RNAi glc)</sup>     |  |
| #2 | N2/Control RNAi                | 21±0.6   | 25 |                                  | 64/90   |                                                     |  |
|    | N2/Control RNAi glucose        | 16.8±0.4 | 21 | -20.3%                           | 92/120  | $p<0.0001$                                          |  |
|    | N2/ <i>pod-2</i> RNAi*         | 23.4±0.6 | 29 | 11.4%                            | 73/120  | 0.0027                                              |  |
|    | N2/ <i>pod-2</i> RNAi glucose* | 15.7±0.4 | 18 | -25.2%<br>-6.1% (ctrl RNAi glc)  | 100/120 | $p<0.0001$<br>0.0851 <sup>(ctrl RNAi glc)</sup>     |  |
|    | N2/ <i>ruvb-2</i> RNAi         | 18.3±0.5 | 21 | -12.8%                           | 56/90   | 0.0023                                              |  |
|    | N2/ <i>ruvb-2</i> RNAi glucose | 14.2±0.3 | 16 | -32.3%<br>-15.1% (ctrl RNAi glc) | 57/90   | $p<0.0001$<br>$p<0.0001$ <sup>(ctrl RNAi glc)</sup> |  |
|    | N2/ <i>rmp-6</i> RNAi          | 13.2±0.6 | 16 | -37.3%                           | 21/50   | $p<0.0001$                                          |  |

|    |                                |          |    |                                  |         |                                              |  |
|----|--------------------------------|----------|----|----------------------------------|---------|----------------------------------------------|--|
|    | N2/ <i>rmp-6</i> RNAi glucose  | 11.9±0.2 | 14 | -43.6%<br>-29.2% (ctrl RNAi glc) | 73/120  | $p < 0.0001$<br>$p < 0.0001$ (ctrl RNAi glc) |  |
|    | N2/ <i>use-1</i> RNAi          | 12.7±0.3 | 16 | -39.8%                           | 48/90   | $p < 0.0001$                                 |  |
|    | N2/ <i>use-1</i> RNAi glucose  | 11.3±0.2 | 14 | -46.3%<br>-32.6% (ctrl RNAi glc) | 51/90   | $p < 0.0001$<br>$p < 0.0001$ (ctrl RNAi glc) |  |
|    | N2/ <i>ztf-19</i> RNAi         | 16.7±0.6 | 21 | -20.8%                           | 49/90   | $p < 0.0001$                                 |  |
|    | N2/ <i>ztf-19</i> RNAi glucose | 14.7±0.5 | 18 | -30.1%<br>-12.3% (ctrl RNAi glc) | 93/120  | $p < 0.0001$<br>0.0093 (ctrl RNAi glc)       |  |
| #1 | N2/Control RNAi                | 21.2±0.6 | 26 |                                  | 101/120 |                                              |  |
|    | N2/Control RNAi glucose        | 12.5±0.3 | 14 | -41.1%                           | 85/120  | $p < 0.0001$                                 |  |
|    | N2/ <i>pod-2</i> RNAi*         | 22.5±0.7 | 28 | 6.3%                             | 75/90   | 0.3135                                       |  |
|    | N2/ <i>pod-2</i> RNAi glucose* | 12±0.3   | 14 | -43.6%<br>-4.2% (ctrl RNAi glc)  | 103/120 | $p < 0.0001$<br>$p < 0.0001$ (ctrl RNAi glc) |  |
|    | N2/ <i>plk-1</i> RNAi          | 16.8±0.4 | 20 | -20.9%                           | 80/103  | $p < 0.0001$                                 |  |
|    | N2/ <i>plk-1</i> RNAi glucose  | 13.2±0.5 | 18 | -37.8%<br>5.7% (ctrl RNAi glc)   | 93/120  | $p < 0.0001$<br>0.1324 (ctrl RNAi glc)       |  |
|    | N2/ <i>fos-1</i> RNAi          | 14.3±0.5 | 18 | -32.7%                           | 88/120  | $p < 0.0001$                                 |  |
|    | N2/ <i>fos-1</i> RNAi glucose  | 10.4±0.4 | 12 | -51.0%                           | 95/120  | $p < 0.0001$<br>0.0002 (ctrl RNAi)           |  |

|                                  |                                  |          |                                  |                                  |                                              |                                              |  |
|----------------------------------|----------------------------------|----------|----------------------------------|----------------------------------|----------------------------------------------|----------------------------------------------|--|
|                                  |                                  |          |                                  | -16.8% (ctrl RNAi glc)           |                                              | glc)                                         |  |
|                                  | N2/ <i>T19B10.2</i> RNAi         | 18±0.5   | 20                               | -15.0%                           | 70/80                                        | 0.0002                                       |  |
|                                  | N2/ <i>T19B10.2</i> RNAi glucose | 15.8±0.3 | 18                               | -25.5%<br>26.5% (ctrl RNAi glc)  | 88/120                                       | $p < 0.0001$<br>$p < 0.0001$ (ctrl RNAi glc) |  |
| #2                               | N2/Control RNAi                  | 25.4±0.8 | 34                               |                                  | 106/120                                      |                                              |  |
|                                  | N2/Control RNAi glucose          | 14.6±0.4 | 21                               | -42.5%                           | 113/120                                      | $p < 0.0001$                                 |  |
|                                  | N2/ <i>pod-2</i> RNAi*           | 24.6±0.8 | 29                               | -3.3%                            | 97/120                                       | 0.352                                        |  |
|                                  | N2/ <i>pod-2</i> RNAi glucose*   | 13.4±0.4 | 17                               | -47.2%<br>-8.2% (ctrl RNAi glc)  | 113/120                                      | $p < 0.0001$<br>0.0565 (ctrl RNAi glc)       |  |
|                                  | N2/ <i>plk-1</i> RNAi            | 16.9±0.7 | 21                               | -33.3%                           | 65/75                                        | $p < 0.0001$                                 |  |
|                                  | N2/ <i>plk-1</i> RNAi glucose    | 13.4±0.6 | 17                               | -47.4%<br>-8.5% (ctrl RNAi glc)  | 112/120                                      | $p < 0.0001$<br>0.5428 (ctrl RNAi glc)       |  |
|                                  | N2/ <i>fos-1</i> RNAi            | 13.4±0.6 | 17                               | -47.3%                           | 94/120                                       | $p < 0.0001$                                 |  |
|                                  | N2/ <i>fos-1</i> RNAi glucose    | 12.2±0.5 | 14                               | -52.0%<br>-16.6% (ctrl RNAi glc) | 110/120                                      | $p < 0.0001$<br>0.0021 (ctrl RNAi glc)       |  |
|                                  | N2/ <i>T19B10.2</i> RNAi         | 19.2±0.4 | 24                               | -24.3%                           | 98/120                                       | $p < 0.0001$                                 |  |
| N2/ <i>T19B10.2</i> RNAi glucose | 11.4±0.4                         | 17       | -55.0%<br>-21.8% (ctrl RNAi glc) | 116/120                          | $p < 0.0001$<br>$p < 0.0001$ (ctrl RNAi glc) |                                              |  |

|    |                                   |          |    |                                  |         |                                          |
|----|-----------------------------------|----------|----|----------------------------------|---------|------------------------------------------|
| #1 | N2/Control RNAi                   | 22.6±0.7 | 27 |                                  | 113/120 |                                          |
|    | N2/Control RNAi glucose           | 12.6±0.4 | 14 | -44.2%                           | 117/120 | $p<0.0001$                               |
|    | N2/ <i>pod-2</i> RNAi*            | 23.9±0.5 | 27 | 5.9%                             | 106/120 | 0.705                                    |
|    | N2/ <i>pod-2</i> RNAi glucose*    | 10.3±0.2 | 12 | -54.6%<br>-18.7% (ctrl RNAi glc) | 114/120 | $p<0.0001$<br>$p<0.0001$ (ctrl RNAi glc) |
|    | N2/ <i>ruvb-1</i> RNAi            | 14.3±0.4 | 16 | -36.7%                           | 92/120  | $p<0.0001$                               |
|    | N2/ <i>ruvb-1</i> RNAi glucose    | 13.2±0.5 | 16 | -41.7%<br>4.5% (ctrl RNAi glc)   | 108/120 | $p<0.0001$<br>0.3112 (ctrl RNAi glc)     |
|    | N2/ <i>lin-59</i> RNAi            | 11.2±0.3 | 14 | -50.6%                           | 72/120  | $p<0.0001$                               |
|    | N2/ <i>lin-59</i> RNAi glucose    | 7.4±0.2  | 10 | -67.3%<br>-41.4% (ctrl RNAi glc) | 97/120  | $p<0.0001$<br>$p<0.0001$ (ctrl RNAi glc) |
|    | N2/ <i>aman-3</i> RNAi            | 21.3±0.7 | 27 | -5.6%                            | 100/120 | 0.1735                                   |
|    | N2/ <i>aman-3</i> RNAi glucose    | 12.5±0.4 | 15 | -44.8%<br>-1.0% (ctrl RNAi glc)  | 110/120 | $p<0.0001$<br>0.9788 (ctrl RNAi glc)     |
|    | N2/ <i>Y53F4B.14</i> RNAi         | 21.9±0.9 | 27 | -3.2%                            | 81/90   | 0.9177                                   |
|    | N2/ <i>Y53F4B.14</i> RNAi glucose | 11.5±0.3 | 15 | -49.0%<br>-8.7% (ctrl RNAi glc)  | 110/120 | $p<0.0001$<br>0.0526 (ctrl RNAi glc)     |
| #2 | N2/Control RNAi                   | 23.4±0.7 | 30 |                                  | 89/120  |                                          |

|    |                                   |          |    |                                  |         |                                                 |  |
|----|-----------------------------------|----------|----|----------------------------------|---------|-------------------------------------------------|--|
|    | N2/Control RNAi glucose           | 16.3±0.6 | 19 | -30.5%                           | 69/119  | $p<0.0001$                                      |  |
|    | N2/ <i>pod-2</i> RNAi*            | 23.3±0.7 | 28 | -0.5%                            | 93/120  | 0.7756                                          |  |
|    | N2/ <i>pod-2</i> RNAi glucose*    | 15.6±0.4 | 19 | -33.1%<br>-3.8% (ctrl RNAi glc)  | 39/119  | $p<0.0001$<br>0.8692 <sup>(ctrl RNAi glc)</sup> |  |
|    | N2/ <i>ruvb-1</i> RNAi            | 16.7±0.5 | 19 | -28.7%                           | 90/120  | $p<0.0001$                                      |  |
|    | N2/ <i>ruvb-1</i> RNAi glucose    | 18.1±0.5 | 21 | -22.5%<br>11.5% (ctrl RNAi glc)  | 69/119  | $p<0.0001$<br>0.0204 <sup>(ctrl RNAi glc)</sup> |  |
|    | N2/ <i>lin-59</i> RNAi            | 12.1±0.4 | 15 | -48.2%                           | 45/120  | $p<0.0001$                                      |  |
|    | N2/ <i>lin-59</i> RNAi glucose    | 12±0.7   | 15 | -48.7%<br>-26.2% (ctrl RNAi glc) | 22/117  | $p<0.0001$<br>0.0004 <sup>(ctrl RNAi glc)</sup> |  |
|    | N2/ <i>aman-3</i> RNAi            | 24.4±0.7 | 28 | 4.3%                             | 73/120  | 0.5786                                          |  |
|    | N2/ <i>aman-3</i> RNAi glucose    | 16.1±0.5 | 19 | -31.4%<br>-1.2% (ctrl RNAi glc)  | 69/118  | $p<0.0001$<br>0.7085 <sup>(ctrl RNAi glc)</sup> |  |
|    | N2/ <i>Y53F4B.14</i> RNAi         | 22.5±0.7 | 28 | -3.8%                            | 77/120  | 0.2612                                          |  |
|    | N2/ <i>Y53F4B.14</i> RNAi glucose | 16±0.5   | 19 | -31.6%<br>-1.6% (ctrl RNAi glc)  | 69/120  | $p<0.0001$<br>0.5889 <sup>(ctrl RNAi glc)</sup> |  |
| #1 | N2/Control RNAi                   | 18.6±0.6 | 24 |                                  | 102/120 |                                                 |  |
|    | N2/Control RNAi glucose           | 12.6±0.4 | 14 | -32.5%                           | 119/120 | $p<0.0001$                                      |  |

|    |                                  |          |    |                                  |         |                                                                 |  |
|----|----------------------------------|----------|----|----------------------------------|---------|-----------------------------------------------------------------|--|
|    | N2/ <i>pod-2</i> RNAi*           | 19±0.6   | 24 | 2.3%                             | 108/120 | 0.7185                                                          |  |
|    | N2/ <i>pod-2</i> RNAi glucose*   | 10.1±0.2 | 12 | -45.7%<br>-19.6% (ctrl RNAi glc) | 120/120 | <i>p</i> <0.0001<br><i>p</i> <0.0001 <sup>(ctrl RNAi glc)</sup> |  |
|    | N2/ <i>F26A10.2</i> RNAi         | 13.2±0.4 | 16 | -29.1%                           | 79/102  | <i>p</i> <0.0001                                                |  |
|    | N2/ <i>F26A10.2</i> RNAi glucose | 12.3±0.5 | 16 | -33.9%<br>-2.1% (ctrl RNAi glc)  | 105/109 | <i>p</i> <0.0001<br>0.7831 <sup>(ctrl RNAi glc)</sup>           |  |
|    | N2/ <i>C50B6.3</i> RNAi          | 20.5±0.7 | 27 | 10.4%                            | 97/120  | 0.036                                                           |  |
|    | N2/ <i>C50B6.3</i> RNAi glucose  | 10.9±0.3 | 12 | -41.7%<br>-13.7% (ctrl RNAi glc) | 120/120 | <i>p</i> <0.0001<br>0.0012 <sup>(ctrl RNAi glc)</sup>           |  |
|    | N2/ <i>K06B4.4</i> RNAi          | 22.1±0.8 | 27 | 18.8%                            | 93/120  | 0.0003                                                          |  |
|    | N2/ <i>K06B4.4</i> RNAi glucose  | 11.6±0.4 | 14 | -37.6%<br>-7.6% (ctrl RNAi glc)  | 110/120 | <i>p</i> <0.0001<br>0.1219 <sup>(ctrl RNAi glc)</sup>           |  |
| #2 | N2/Control RNAi                  | 21.9±0.7 | 28 |                                  | 97/120  |                                                                 |  |
|    | N2/Control RNAi glucose          | 13.1±0.4 | 15 | -40.2%                           | 117/120 | <i>p</i> <0.0001                                                |  |
|    | N2/ <i>pod-2</i> RNAi*           | 22.5±0.7 | 28 | 2.7%                             | 103/120 | 0.6546                                                          |  |
|    | N2/ <i>pod-2</i> RNAi glucose*   | 10.3±0.2 | 13 | -53.0%<br>-21.4% (ctrl RNAi glc) | 116/120 | <i>p</i> <0.0001<br><i>p</i> <0.0001 <sup>(ctrl RNAi glc)</sup> |  |
|    | N2/ <i>F26A10.2</i> RNAi         | 13.9±0.5 | 15 | -36.6%                           | 101/120 | <i>p</i> <0.0001                                                |  |

|    |                                  |          |    |                                  |         |                                          |  |
|----|----------------------------------|----------|----|----------------------------------|---------|------------------------------------------|--|
|    | N2/ <i>F26A10.2</i> RNAi glucose | 14.7±0.5 | 20 | -32.9%<br>12.2% (ctrl RNAi glc)  | 113/120 | $p<0.0001$<br>0.0068(ctrl RNAi glc)      |  |
|    | N2/ <i>C50B6.3</i> RNAi          | 20.9±0.6 | 26 | -4.6%                            | 103/120 | 0.212                                    |  |
|    | N2/ <i>C50B6.3</i> RNAi glucose  | 13.1±0.4 | 17 | -40.2%<br>0.1% (ctrl RNAi glc)   | 116/120 | $p<0.0001$<br>0.9686(ctrl RNAi glc)      |  |
|    | N2/ <i>K06B4.4</i> RNAi          | 23.6±0.7 | 30 | 7.7%                             | 96/120  | 0.0967                                   |  |
|    | N2/ <i>K06B4.4</i> RNAi glucose  | 12.2±0.4 | 13 | -44.3%<br>-6.9% (ctrl RNAi glc)  | 113/120 | $p<0.0001$<br>0.0799(ctrl RNAi glc)      |  |
| #1 | N2/Control RNAi                  | 22.5±0.6 | 26 |                                  | 105/119 |                                          |  |
|    | N2/Control RNAi glucose          | 10.8±0.2 | 14 | -51.9%                           | 91/120  | $p<0.0001$                               |  |
|    | N2/ <i>pod-2</i> RNAi*           | 24.1±0.6 | 29 | 6.9%                             | 102/120 | 0.0973                                   |  |
|    | N2/ <i>pod-2</i> RNAi glucose*   | 9.4±0.2  | 12 | -58.4%<br>-13.5% (ctrl RNAi glc) | 79/90   | $p<0.0001$<br>$p<0.0001$ (ctrl RNAi glc) |  |
|    | N2/ <i>R10D12.7</i> RNAi         | 23.3±0.8 | 29 | 3.4%                             | 65/80   | 0.4844                                   |  |
|    | N2/ <i>R10D12.7</i> RNAi glucose | 11.3±0.3 | 14 | -49.8%<br>4.4% (ctrl RNAi glc)   | 97/120  | $p<0.0001$<br>0.1646(ctrl RNAi glc)      |  |
|    | N2/ <i>pmp-3</i> RNAi            | 17.9±0.2 | 22 | -20.4%                           | 103/120 | $p<0.0001$                               |  |
|    | N2/ <i>pmp-3</i> RNAi glucose    | 11.6±0.3 | 14 | -48.4%                           | 100/120 | $p<0.0001$<br>0.0545(ctrl RNAi)          |  |

|                                  |                                  |          |                                |                                  |                                            |                                            |
|----------------------------------|----------------------------------|----------|--------------------------------|----------------------------------|--------------------------------------------|--------------------------------------------|
|                                  |                                  |          | 7.3% (ctrl RNAi glc)           |                                  | glc)                                       |                                            |
|                                  | N2/ <i>C01G10.1</i> RNAi         | 22±0.5   | 26                             | -2.2%                            | 93/120                                     | 0.4347                                     |
|                                  | N2/ <i>C01G10.1</i> RNAi glucose | 10.5±0.2 | 12                             | -53.3%<br>-2.9% (ctrl RNAi glc)  | 102/120                                    | <i>p</i> <0.0001<br>0.183 (ctrl RNAi glc)  |
| #2                               | N2/Control RNAi                  | 24.8±0.8 | 32                             |                                  | 99/120                                     |                                            |
|                                  | N2/Control RNAi glucose          | 13.4±0.4 | 20                             | -45.9%                           | 115/120                                    | <i>p</i> <0.0001                           |
|                                  | N2/ <i>pod-2</i> RNAi*           | 26.9±0.7 | 32                             | 8.5%                             | 97/120                                     | 0.254                                      |
|                                  | N2/ <i>pod-2</i> RNAi glucose*   | 10.9±0.3 | 15                             | -56.1%<br>-18.9% (ctrl RNAi glc) | 67/75                                      | <i>p</i> <0.0001<br>0.0001 (ctrl RNAi glc) |
|                                  | N2/ <i>R10D12.7</i> RNAi         | 27±0.8   | 35                             | 9.0%                             | 97/120                                     | 0.0455                                     |
|                                  | N2/ <i>R10D12.7</i> RNAi glucose | 14±0.5   | 20                             | -43.3%<br>4.8% (ctrl RNAi glc)   | 114/120                                    | <i>p</i> <0.0001<br>0.2468 (ctrl RNAi glc) |
|                                  | N2/ <i>pmp-3</i> RNAi            | 20.3±0.5 | 24                             | -18.0%                           | 113/120                                    | <i>p</i> <0.0001                           |
|                                  | N2/ <i>pmp-3</i> RNAi glucose    | 15±0.4   | 20                             | -39.5%<br>11.9% (ctrl RNAi glc)  | 109/120                                    | <i>p</i> <0.0001<br>0.0141 (ctrl RNAi glc) |
|                                  | N2/ <i>C01G10.1</i> RNAi         | 24±0.7   | 30                             | -3.2%                            | 92/120                                     | 0.3487                                     |
| N2/ <i>C01G10.1</i> RNAi glucose | 13.9±0.5                         | 20       | -43.9%<br>3.7% (ctrl RNAi glc) | 116/120                          | <i>p</i> <0.0001<br>0.3102 (ctrl RNAi glc) |                                            |



|    |                                |          |    |                                  |         |                                                      |           |
|----|--------------------------------|----------|----|----------------------------------|---------|------------------------------------------------------|-----------|
| #1 | N2/Control RNAi                | 17.8±0.3 | 20 |                                  | 112/120 |                                                      |           |
|    | N2/Control RNAi glucose        | 15.7±0.3 | 18 | -11.8%                           | 70/120  | 0.0001                                               |           |
|    | N2/ <i>lpin-1</i> RNAi         | 16.3±0.2 | 20 | -8.1%                            | 111/120 | <i>p</i> <0.0001                                     |           |
|    | N2/ <i>lpin-1</i> RNAi glucose | 9.1±0.2  | 13 | -48.7%<br>-41.9% (ctrl RNAi glc) | 80/120  | <i>p</i> <0.0001<br><i>p</i> <0.0001 (ctrl RNAi glc) |           |
| #2 | N2/Control RNAi                | 17.4±0.5 | 21 |                                  | 62/120  |                                                      | Figure 1B |
|    | N2/Control RNAi glucose        | 14.7±0.3 | 17 | -15.7%                           | 100/120 | <i>p</i> <0.0001                                     | Figure 1B |
|    | N2/ <i>lpin-1</i> RNAi         | 16.9±0.3 | 19 | -3.2%                            | 116/120 | 0.0901                                               | Figure 1B |
|    | N2/ <i>lpin-1</i> RNAi glucose | 7.4±0.2  | 10 | -57.7%<br>-49.8% (ctrl RNAi glc) | 68/120  | <i>p</i> <0.0001<br><i>p</i> <0.0001 (ctrl RNAi glc) | Figure 1B |
| #1 | N2/Control RNAi                | 22.6±0.6 | 25 |                                  | 72/120  |                                                      |           |
|    | N2/Control RNAi glucose        | 13.5±0.4 | 14 | -40.4%                           | 39/120  | <i>p</i> <0.0001                                     |           |
|    | N2/ <i>pod-2</i> RNAi*         | 21.5±0.4 | 25 | -4.6%                            | 96/120  | 0.1349                                               |           |
|    | N2/ <i>pod-2</i> RNAi glucose* | 9.9±0.1  | 10 | -55.9%<br>-26.1% (ctrl RNAi glc) | 71/120  | <i>p</i> <0.0001<br><i>p</i> <0.0001 (ctrl RNAi glc) |           |
|    | N2/ <i>cdk-1</i> RNAi          | 16.7±0.2 | 17 | -25.9%                           | 110/120 | <i>p</i> <0.0001                                     |           |
|    | N2/ <i>cdk-1</i> RNAi glucose  | 17.4±0.4 | 21 | -23.1%<br>29.0% (ctrl RNAi glc)  | 59/120  | <i>p</i> <0.0001<br><i>p</i> <0.0001 (ctrl RNAi glc) |           |

|    |                                  |          |    |                                 |         |                                                                 |  |
|----|----------------------------------|----------|----|---------------------------------|---------|-----------------------------------------------------------------|--|
|    | N2/ <i>him-17</i> RNAi           | 21.3±0.4 | 25 | -5.5%                           | 84/120  | 0.0157                                                          |  |
|    | N2/ <i>him-17</i> RNAi glucose   | 15.4±0.4 | 17 | -31.6%<br>14.7% (ctrl RNAi glc) | 52/120  | <i>p</i> <0.0001<br>0.0013 <sup>(ctrl RNAi glc)</sup>           |  |
|    | N2/ <i>din-1</i> RNAi            | 20.5±0.4 | 23 | -9.1%                           | 79/120  | 0.0016                                                          |  |
|    | N2/ <i>din-1</i> RNAi glucose    | 17.4±0.5 | 23 | -22.8%<br>29.4% (ctrl RNAi glc) | 82/120  | <i>p</i> <0.0001<br><i>p</i> <0.0001 <sup>(ctrl RNAi glc)</sup> |  |
|    | N2/ <i>xbp-1</i> RNAi            | 19.2±0.3 | 21 | -14.7%                          | 74/120  | <i>p</i> <0.0001                                                |  |
|    | N2/ <i>xbp-1</i> RNAi glucose    | 12.9±0.3 | 14 | -42.7%<br>-3.9% (ctrl RNAi glc) | 42/120  | <i>p</i> <0.0001<br>0.4175 <sup>(ctrl RNAi glc)</sup>           |  |
|    | N2/ <i>C18D11.3</i> RNAi         | 21.8±0.5 | 25 | -3.5%                           | 72/120  | 0.1833                                                          |  |
|    | N2/ <i>C18D11.3</i> RNAi glucose | 13.3±0.4 | 17 | -41.2%<br>-1.3% (ctrl RNAi glc) | 49/120  | <i>p</i> <0.0001<br>0.3498 <sup>(ctrl RNAi glc)</sup>           |  |
| #2 | N2/Control RNAi                  | 23±0.8   | 27 |                                 | 90/120  |                                                                 |  |
|    | N2/Control RNAi glucose          | 16.8±0.5 | 19 | -26.8%                          | 35/120  | <i>p</i> <0.0001                                                |  |
|    | N2/ <i>pod-2</i> RNAi*           | 21.9±0.7 | 27 | -5.0%                           | 79/120  | 0.1922                                                          |  |
|    | N2/ <i>pod-2</i> RNAi glucose*   | 19.7±0.9 | 25 | -14.4%<br>16.9% (ctrl RNAi glc) | 68/120  | 0.0046<br>0.3169 <sup>(ctrl RNAi glc)</sup>                     |  |
|    | N2/ <i>cdk-1</i> RNAi            | 16.7±0.4 | 19 | -27.5%                          | 106/120 | <i>p</i> <0.0001                                                |  |

|    |                                  |          |    |                                  |         |                                                                 |  |
|----|----------------------------------|----------|----|----------------------------------|---------|-----------------------------------------------------------------|--|
|    | N2/ <i>cdk-1</i> RNAi glucose    | 18.9±0.6 | 23 | -17.9%<br>12.1% (ctrl RNAi glc)  | 34/85   | 0.0172<br>0.0092 <sup>(ctrl RNAi glc)</sup>                     |  |
|    | N2/ <i>him-17</i> RNAi           | 22.2±0.7 | 27 | -3.5%                            | 89/120  | 0.2707                                                          |  |
|    | N2/ <i>him-17</i> RNAi glucose   | 17.3±0.3 | 19 | -24.7%<br>2.9% (ctrl RNAi glc)   | 58/120  | <i>p</i> <0.0001<br>0.2801 <sup>(ctrl RNAi glc)</sup>           |  |
|    | N2/ <i>din-1</i> RNAi            | 21.1±0.6 | 25 | -8.4%                            | 111/120 | 0.0231                                                          |  |
|    | N2/ <i>din-1</i> RNAi glucose    | 21.2±0.4 | 25 | -7.9%<br>25.8% (ctrl RNAi glc)   | 63/120  | 0.1704<br><i>p</i> <0.0001 <sup>(ctrl RNAi glc)</sup>           |  |
|    | N2/ <i>xbp-1</i> RNAi            | 20.5±0.6 | 21 | -10.7%                           | 105/120 | 0.0148                                                          |  |
|    | N2/ <i>xbp-1</i> RNAi glucose    | 14±0.2   | 15 | -39.0%<br>-16.7% (ctrl RNAi glc) | 58/115  | <i>p</i> <0.0001<br><i>p</i> <0.0001 <sup>(ctrl RNAi glc)</sup> |  |
|    | N2/ <i>C18D11.3</i> RNAi         | 24.5±0.7 | 30 | 6.5%                             | 93/120  | 0.2401                                                          |  |
|    | N2/ <i>C18D11.3</i> RNAi glucose | 16.2±0.4 | 19 | -29.4%<br>-3.6% (ctrl RNAi glc)  | 40/120  | <i>p</i> <0.0001<br>0.3333 <sup>(ctrl RNAi glc)</sup>           |  |
| #1 | N2/Control RNAi                  | 22.4±0.7 | 28 |                                  | 101/120 |                                                                 |  |
|    | N2/Control RNAi glucose          | 15.5±0.6 | 20 | -30.7%                           | 55/120  | <i>p</i> <0.0001                                                |  |
|    | N2/ <i>snn-1</i> RNAi            | 22.6±0.6 | 26 | 0.9%                             | 70/120  | 0.5325                                                          |  |
|    | N2/ <i>snn-1</i> RNAi glucose    | 16.1±0.4 | 18 | -28.2%                           | 55/120  | <i>p</i> <0.0001<br>0.4927 <sup>(ctrl RNAi)</sup>               |  |

|    |                                |          |                      |                                 |         |                                                       |
|----|--------------------------------|----------|----------------------|---------------------------------|---------|-------------------------------------------------------|
|    |                                |          | 3.6% (ctrl RNAi glc) |                                 | glc)    |                                                       |
|    | N2/ <i>mut-15</i> RNAi         | 22.9±0.7 | 26                   | 2.1%                            | 71/120  | 0.7752                                                |
|    | N2/ <i>mut-15</i> RNAi glucose | 15.5±0.4 | 18                   | -30.7%<br>0.0%                  | 61/120  | <i>p</i> <0.0001<br>0.7535 <sup>(ctrl RNAi glc)</sup> |
|    | N2/ <i>lpr-6</i> RNAi          | 24.2±0.7 | 28                   | 8.1%                            | 104/120 | 0.0563                                                |
|    | N2/ <i>lpr-6</i> RNAi glucose  | 17.1±0.4 | 20                   | -23.5%<br>10.4%                 | 73/120  | <i>p</i> <0.0001<br>0.0286 <sup>(ctrl RNAi glc)</sup> |
|    | N2/ <i>lips-2</i> RNAi         | 21.3±0.5 | 24                   | -4.7%                           | 67/120  | 0.0133                                                |
|    | N2/ <i>lips-2</i> RNAi glucose | 15.1±0.5 | 18                   | -32.6%<br>-2.8% (ctrl RNAi glc) | 53/120  | <i>p</i> <0.0001<br>0.6462 <sup>(ctrl RNAi glc)</sup> |
| #2 | N2/Control RNAi                | 21.8±0.7 | 27                   |                                 | 68/90   |                                                       |
|    | N2/Control RNAi glucose        | 17.3±0.4 | 21                   | -20.7%                          | 54/120  | <i>p</i> <0.0001                                      |
|    | N2/ <i>snn-1</i> RNAi          | 21.9±0.8 | 27                   | 0.2%                            | 80/120  | 0.5854                                                |
|    | N2/ <i>snn-1</i> RNAi glucose  | 16.5±0.3 | 19                   | -24.6%<br>-4.9% (ctrl RNAi glc) | 57/110  | <i>p</i> <0.0001<br>0.0291 <sup>(ctrl RNAi glc)</sup> |
|    | N2/ <i>mut-15</i> RNAi         | 22.1±0.7 | 25                   | 1.1%                            | 44/60   | 0.8766                                                |
|    | N2/ <i>mut-15</i> RNAi glucose | 17.2±0.5 | 19                   | -21.2%<br>-0.6% (ctrl RNAi glc) | 25/90   | 0.0004<br>0.652 <sup>(ctrl RNAi glc)</sup>            |

|    |                                  |          |    |                                  |         |                                                         |           |
|----|----------------------------------|----------|----|----------------------------------|---------|---------------------------------------------------------|-----------|
|    | N2/ <i>lpr-6</i> RNAi            | 25.8±0.9 | 30 | 18.0%                            | 68/120  | 0.0002                                                  |           |
|    | N2/ <i>lpr-6</i> RNAi glucose    | 16.6±0.3 | 19 | -24.2%<br>-4.4% (ctrl RNAi glc)  | 56/120  | $p < 0.0001$<br>0.0332 <sup>(ctrl RNAi glc)</sup>       |           |
|    | N2/ <i>lips-2</i> RNAi           | 20.3±0.7 | 23 | -7.1%                            | 42/90   | 0.042                                                   |           |
|    | N2/ <i>lips-2</i> RNAi glucose   | 18.1±0.6 | 21 | -17.1%<br>4.6% (ctrl RNAi glc)   | 32/90   | 0.0024<br>0.1708 <sup>(ctrl RNAi glc)</sup>             |           |
| #1 | N2/Control RNAi                  | 20.9±0.6 | 26 |                                  | 70/90   |                                                         | Figure 1C |
|    | N2/Control RNAi glucose          | 16.5±0.4 | 19 | -21.0%                           | 61/120  | $p < 0.0001$                                            | Figure 1C |
|    | N2/ <i>pod-2</i> RNAi*           | 19±0.4   | 24 | -9.0%                            | 88/120  | 0.001                                                   |           |
|    | N2/ <i>pod-2</i> RNAi glucose*   | 10.9±0.2 | 13 | -47.7%<br>-33.8% (ctrl RNAi glc) | 59/120  | $p < 0.0001$<br>$p < 0.0001$ <sup>(ctrl RNAi glc)</sup> |           |
|    | N2/ <i>cyp-42A1</i> RNAi         | 15.4±0.3 | 17 | -26.2%                           | 95/120  | $p < 0.0001$                                            | Figure 1C |
|    | N2/ <i>cyp-42A1</i> RNAi glucose | 2.4±0.1  | 2  | -88.6%<br>-85.5% (ctrl RNAi glc) | 120/120 | $p < 0.0001$<br>$p < 0.0001$ <sup>(ctrl RNAi glc)</sup> | Figure 1C |
|    | N2/ <i>cit-1.2</i> RNAi          | 19.7±0.4 | 23 | -5.6%                            | 89/120  | 0.0058                                                  |           |
|    | N2/ <i>cit-1.2</i> RNAi glucose  | 17.8±0.4 | 21 | -14.8%<br>7.8% (ctrl RNAi glc)   | 67/120  | $p < 0.0001$<br>0.0171 <sup>(ctrl RNAi glc)</sup>       |           |

|    |                                  |          |    |                                  |         |                                            |             |
|----|----------------------------------|----------|----|----------------------------------|---------|--------------------------------------------|-------------|
| #2 | N2/Control RNAi                  | 22.5±0.5 | 26 |                                  | 115/120 |                                            |             |
|    | N2/Control RNAi glucose          | 14.2±0.4 | 20 | -37.0%                           | 110/120 | $p<0.0001$                                 |             |
|    | N2/ <i>pod-2</i> RNAi*           | 19.1±0.5 | 22 | -15.1%                           | 112/120 | $p<0.0001$                                 |             |
|    | N2/ <i>pod-2</i> RNAi glucose*   | 10.4±0.2 | 13 | -54.0%<br>-27.0% (ctrl RNAi glc) | 110/120 | $p<0.0001$<br>$p<0.0001^{(ctrl RNAi glc)}$ |             |
|    | N2/ <i>cyp-42A1</i> RNAi         | 18.8±0.4 | 22 | -16.7%                           | 118/120 | $p<0.0001$                                 |             |
|    | N2/ <i>cyp-42A1</i> RNAi glucose | 2.9±0.1  | 4  | -87.3%<br>-79.9% (ctrl RNAi glc) | 120/120 | $p<0.0001$<br>$p<0.0001^{(ctrl RNAi glc)}$ |             |
|    | N2/ <i>cit-1.2</i> RNAi          | 20.5±0.4 | 23 | -9.1%                            | 112/120 | 0.0001                                     |             |
|    | N2/ <i>cit-1.2</i> RNAi glucose  | 16.1±0.4 | 19 | -28.5%<br>13.5% (ctrl RNAi glc)  | 119/120 | $p<0.0001$<br>0.001 (ctrl RNAi glc)        |             |
| #1 | N2/Control RNAi                  | 19.9±0.6 | 24 |                                  | 101/120 |                                            | Figure 1D-H |
|    | N2/Control RNAi glucose          | 16.7±0.6 | 22 | -16.1%                           | 58/120  | $p<0.0001$                                 | Figure 1D-H |
|    | N2/ <i>plk-1</i> RNAi            | 14.5±0.2 | 15 | -27.1%                           | 89/120  | $p<0.0001$                                 | Figure 1D   |
|    | N2/ <i>plk-1</i> RNAi glucose    | 15.1±0.5 | 19 | -24.1%<br>-9.5% (ctrl RNAi glc)  | 61/120  | $p<0.0001$<br>0.0501 (ctrl RNAi glc)       | Figure 1D   |
|    | N2/ <i>T20B12.3</i> RNAi         | 13.7±0.3 | 15 | -31.3%                           | 82/120  | $p<0.0001$                                 | Figure 1E   |
|    | N2/ <i>T20B12.3</i> RNAi glucose | 17.4±0.7 | 22 | -12.8%<br>4.0% (ctrl RNAi glc)   | 52/120  | 0.0014<br>0.4475 (ctrl RNAi glc)           | Figure 1E   |

|    |                                |          |    |                                  |         |                                                       |           |
|----|--------------------------------|----------|----|----------------------------------|---------|-------------------------------------------------------|-----------|
|    | N2/ <i>sox-2</i> RNAi          | 13.8±0.3 | 15 | -30.5%                           | 81/120  | glc)<br><i>p</i> <0.0001                              |           |
|    | N2/ <i>sox-2</i> RNAi glucose  | 14.1±0.7 | 17 | -29.2%<br>-15.6% (ctrl RNAi glc) | 36/120  | <i>p</i> <0.0001<br>0.006 <sup>(ctrl RNAi glc)</sup>  |           |
|    | N2/ <i>top-2</i> RNAi          | 12.2±0.2 | 13 | -38.8%                           | 93/120  | <i>p</i> <0.0001                                      | Figure 1F |
|    | N2/ <i>top-2</i> RNAi glucose  | 14.7±0.5 | 19 | -26.1%<br>-11.9% (ctrl RNAi glc) | 61/120  | <i>p</i> <0.0001<br>0.0086 <sup>(ctrl RNAi glc)</sup> | Figure 1F |
|    | N2/ <i>ruvb-1</i> RNAi         | 12.8±0.3 | 15 | -35.7%                           | 100/120 | <i>p</i> <0.0001                                      | Figure 1G |
|    | N2/ <i>ruvb-1</i> RNAi glucose | 16.1±0.4 | 19 | -19.3%<br>-3.8% (ctrl RNAi glc)  | 70/120  | <i>p</i> <0.0001<br>0.3699 <sup>(ctrl RNAi glc)</sup> | Figure 1G |
|    | N2/ <i>cdk-1</i> RNAi          | 13.5±0.2 | 15 | -32.4%                           | 109/120 | <i>p</i> <0.0001                                      | Figure 1H |
|    | N2/ <i>cdk-1</i> RNAi glucose  | 15.2±0.3 | 17 | -23.9%<br>-9.2% (ctrl RNAi glc)  | 68/120  | <i>p</i> <0.0001<br>0.0768 <sup>(ctrl RNAi glc)</sup> | Figure 1H |
| #2 | N2/Control RNAi                | 19.2±0.7 | 24 |                                  | 81/90   |                                                       |           |
|    | N2/Control RNAi glucose        | 16.7±0.8 | 22 | -12.7%                           | 45/120  | 0.0184                                                |           |
|    | N2/ <i>plk-1</i> RNAi          | 12.2±0.3 | 13 | -36.5%                           | 95/120  | <i>p</i> <0.0001                                      |           |
|    | N2/ <i>plk-1</i> RNAi glucose  | 17.3±0.8 | 22 | -9.8%<br>3.4% (ctrl RNAi glc)    | 29/85   | 0.0916<br>0.6884 <sup>(ctrl RNAi glc)</sup>           |           |

|    |                                  |          |    |                                  |         |                                                 |           |
|----|----------------------------------|----------|----|----------------------------------|---------|-------------------------------------------------|-----------|
|    | N2/ <i>T20B12.3</i> RNAi         | 13.2±0.4 | 17 | -31.1%                           | 76/90   | $p<0.0001$                                      |           |
|    | N2/ <i>T20B12.3</i> RNAi glucose | 17.5±0.6 | 22 | -8.8%<br>4.5% (ctrl RNAi glc)    | 63/120  | 0.0599<br>0.5234 <sup>(ctrl RNAi glc)</sup>     |           |
|    | N2/ <i>sox-2</i> RNAi            | 12.2±0.3 | 14 | -36.3%                           | 88/105  | $p<0.0001$                                      |           |
|    | N2/ <i>sox-2</i> RNAi glucose    | 15.4±0.9 | 22 | -19.4%<br>-7.6% (ctrl RNAi glc)  | 24/80   | 0.0053<br>0.3701 <sup>(ctrl RNAi glc)</sup>     |           |
|    | N2/ <i>top-2</i> RNAi            | 12.3±0.3 | 13 | -35.6%                           | 54/75   | $p<0.0001$                                      |           |
|    | N2/ <i>top-2</i> RNAi glucose    | 14.3±0.6 | 18 | -25.2%<br>-14.3% (ctrl RNAi glc) | 57/120  | $p<0.0001$<br>0.0246 <sup>(ctrl RNAi glc)</sup> |           |
|    | N2/ <i>ruvb-1</i> RNAi           | 12.9±0.3 | 14 | -32.8%                           | 105/120 | $p<0.0001$                                      |           |
|    | N2/ <i>ruvb-1</i> RNAi glucose   | 13.8±0.5 | 17 | -27.7%<br>-17.2% (ctrl RNAi glc) | 84/120  | $p<0.0001$<br>0.0019 <sup>(ctrl RNAi glc)</sup> |           |
|    | N2/ <i>cdk-1</i> RNAi            | 13.4±0.3 | 14 | -30.2%                           | 83/90   | $p<0.0001$                                      |           |
|    | N2/ <i>cdk-1</i> RNAi glucose    | 17±0.5   | 18 | -11.3%<br>1.6% (ctrl RNAi glc)   | 49/120  | 0.2368<br>0.2925 <sup>(ctrl RNAi glc)</sup>     |           |
| #1 | N2/Control RNAi                  | 19.9±0.6 | 25 |                                  | 71/120  |                                                 | Figure 1I |
|    | N2/Control RNAi glucose          | 16.5±0.4 | 19 | -17.2%                           | 55/120  | 0.0001                                          | Figure 1I |
|    | N2/ <i>cyk-4</i> RNAi            | 14.2±0.3 | 17 | -28.3%                           | 99/120  | $p<0.0001$                                      | Figure 1I |



|    |                                  |          |    |                                  |         |                                                   |           |
|----|----------------------------------|----------|----|----------------------------------|---------|---------------------------------------------------|-----------|
|    | N2/ <i>cyk-4</i> RNAi glucose    | 15.9±0.3 | 17 | -20.1%<br>-3.6% (ctrl RNAi glc)  | 86/120  | $p < 0.0001$<br>0.0264 <sup>(ctrl RNAi glc)</sup> | Figure 1I |
|    | N2/ <i>F26A10.2</i> RNAi         | 14.3±0.3 | 17 | -28.0%                           | 91/120  | $p < 0.0001$                                      |           |
|    | N2/ <i>F26A10.2</i> RNAi glucose | 14.3±0.6 | 17 | -27.9%<br>-12.9% (ctrl RNAi glc) | 46/120  | $p < 0.0001$<br>0.0045 <sup>(ctrl RNAi glc)</sup> |           |
|    | N2/ <i>din-1</i> RNAi            | 17.7±0.7 | 21 | -11.1%                           | 92/120  | 0.0721                                            |           |
|    | N2/ <i>din-1</i> RNAi glucose    | 18.4±0.5 | 21 | -7.6%<br>11.6% (ctrl RNAi glc)   | 65/120  | 0.0087<br>0.0008 <sup>(ctrl RNAi glc)</sup>       |           |
|    | N2/ <i>prp-19</i> RNAi           | 13.5±0.3 | 14 | -31.9%                           | 104/120 | $p < 0.0001$                                      |           |
|    | N2/ <i>prp-19</i> RNAi glucose   | 15.7±0.3 | 17 | -20.8%<br>-4.4% (ctrl RNAi glc)  | 68/120  | $p < 0.0001$<br>0.0497 <sup>(ctrl RNAi glc)</sup> |           |
|    | N2/ <i>pmp-3</i> RNAi            | 20.4±0.5 | 25 | 2.8%                             | 99/120  | 0.5689                                            |           |
|    | N2/ <i>pmp-3</i> RNAi glucose    | 15.5±0.4 | 19 | -21.8%<br>-5.5% (ctrl RNAi glc)  | 66/120  | $p < 0.0001$<br>0.1532 <sup>(ctrl RNAi glc)</sup> |           |
| #2 | N2/Control RNAi                  | 19.2±0.5 | 25 |                                  | 100/120 |                                                   | Figure 1J |
|    | N2/Control RNAi glucose          | 13.7±0.3 | 16 | -28.9%                           | 72/120  | $p < 0.0001$                                      | Figure 1J |
|    | N2/ <i>cyk-4</i> RNAi            | 12.7±0.3 | 15 | -33.9%                           | 80/90   | $p < 0.0001$                                      |           |
|    | N2/ <i>cyk-4</i> RNAi glucose    | 15.3±0.4 | 18 | -20.6%                           | 49/80   | $p < 0.0001$<br>0.0062 <sup>(ctrl RNAi)</sup>     |           |

|    |                                  |          |                                  |                                             |         |                                                                 |           |
|----|----------------------------------|----------|----------------------------------|---------------------------------------------|---------|-----------------------------------------------------------------|-----------|
|    |                                  |          | 11.6% <sup>(ctrl RNAi glc)</sup> |                                             | glc)    |                                                                 |           |
|    | N2/ <i>F26A10.2</i> RNAi         | 11.4±0.4 | 12                               | -40.7%                                      | 100/120 | <i>p</i> <0.0001                                                |           |
|    | N2/ <i>F26A10.2</i> RNAi glucose | 14.5±0.5 | 18                               | -24.4%<br>6.3% <sup>(ctrl RNAi glc)</sup>   | 55/120  | <i>p</i> <0.0001<br>0.158 <sup>(ctrl RNAi glc)</sup>            |           |
|    | N2/ <i>din-1</i> RNAi            | 20.3±0.6 | 25                               | 5.8%                                        | 103/120 | 0.0213                                                          |           |
|    | N2/ <i>din-1</i> RNAi glucose    | 15.3±0.6 | 20                               | -20.2%<br>12.2% <sup>(ctrl RNAi glc)</sup>  | 78/120  | <i>p</i> <0.0001<br>0.0295 <sup>(ctrl RNAi glc)</sup>           |           |
|    | N2/ <i>prp-19</i> RNAi           | 12.1±0.2 | 12                               | -37.0%                                      | 84/100  | <i>p</i> <0.0001                                                | Figure 1J |
|    | N2/ <i>prp-19</i> RNAi glucose   | 15.3±0.4 | 18                               | -20.4%<br>11.9% <sup>(ctrl RNAi glc)</sup>  | 79/120  | <i>p</i> <0.0001<br>0.0006 <sup>(ctrl RNAi glc)</sup>           | Figure 1J |
|    | N2/ <i>pmp-3</i> RNAi            | 18.5±0.4 | 22                               | -3.8%                                       | 106/120 | 0.182                                                           |           |
|    | N2/ <i>pmp-3</i> RNAi glucose    | 15.5±0.4 | 18                               | -19.2%<br>13.6% <sup>(ctrl RNAi glc)</sup>  | 85/120  | <i>p</i> <0.0001<br>0.0001 <sup>(ctrl RNAi glc)</sup>           |           |
| #1 | N2/Control RNAi                  | 20.2±0.4 | 24                               |                                             | 113/125 |                                                                 |           |
|    | N2/Control RNAi glucose          | 17.3±0.6 | 20                               | -14.3%                                      | 53/125  | <i>p</i> <0.0001                                                |           |
|    | N2/ <i>cyp-42A1</i> RNAi         | 12.8±0.2 | 14                               | -36.6%                                      | 109/120 | <i>p</i> <0.0001                                                |           |
|    | N2/ <i>cyp-42A1</i> RNAi glucose | 2.2±0.1  | 2                                | -89.1%<br>-87.3% <sup>(ctrl RNAi glc)</sup> | 120/120 | <i>p</i> <0.0001<br><i>p</i> <0.0001 <sup>(ctrl RNAi glc)</sup> |           |

|    |                                  |          |    |                                  |         |                                       |
|----|----------------------------------|----------|----|----------------------------------|---------|---------------------------------------|
| #2 | N2/Control RNAi                  | 19.3±0.4 | 22 |                                  | 77/150  |                                       |
|    | N2/Control RNAi glucose          | 15.3±0.6 | 21 | -20.4%                           | 73/150  | $p<0.0001$                            |
|    | N2/ <i>cyp-42A1</i> RNAi         | 12±0.3   | 14 | -37.6%                           | 112/150 | $p<0.0001$                            |
|    | N2/ <i>cyp-42A1</i> RNAi glucose | 2.6±0.1  | 4  | -86.6%<br>-83.1% (ctrl RNAi glc) | 166/167 | $p<0.0001$ <sup>(ctrl RNAi glc)</sup> |

Lifespan data from the same experimental sets were indicated by bold lines and biological repeats were separated by bold dashed lines and stating trial numbers.

All  $p$  values were calculated by using log-rank test.

Percent change (%) and  $p$  values indicate comparison of each condition with control RNAi on control diets within the same experimental dataset.

ctrl RNAi glc: percent change (%) and  $p$  values were calculated by comparing with control RNAi on glucose diets within the same experimental dataset.

\* indicates experimental set of *pod-2* RNAi, which was used as a positive control that specifically decreased lifespan under glucose-rich conditions (Lee et al., 2015).

'Figures in text' indicates lifespan dataset that was used in designated Figures.

Table S3. The list of *fat-5p::fat-5::gfp* enhancer RNAi clones.

| Gene ID         | Gene name       | Gene description                                                                        | Average score (6X repeats) |
|-----------------|-----------------|-----------------------------------------------------------------------------------------|----------------------------|
| <i>T20B12.8</i> | <i>hmg-4</i>    | <b>FACT (facilitates chromatin transcription) complex subunit SSRP1</b>                 | <b>2.5</b>                 |
| <i>C31E10.7</i> | <i>cybt-5.1</i> | <b>Cytochrome b5 ortholog</b>                                                           | <b>2.1</b>                 |
| <i>T26G10.1</i> | <i>T26G10.1</i> | Putative ATP-dependent RNA helicase                                                     | 2.1                        |
| <i>C17A2.8</i>  | <i>nhr-72</i>   | Nuclear receptor family                                                                 | 2.1                        |
| <i>C46A5.8</i>  | <i>rdl-1</i>    | Human RD3L (retinal degeneration 3-like) and RD3 ortholog                               | 1.8                        |
| <i>C29E4.2</i>  | <i>kle-2</i>    | Human NCAPH2 (non-SMC condensin II complex subunit H2) ortholog                         | 1.8                        |
| <i>T25G3.3</i>  | <i>T25G3.3</i>  | <b><i>S. cerevisiae</i> NMD3 ortholog</b>                                               | <b>1.7</b>                 |
| <i>F43G9.1</i>  | <i>idha-1</i>   | <b>Probable isocitrate dehydrogenase subunit alpha</b>                                  | <b>1.6</b>                 |
| <i>T19C9.3</i>  | <i>srh-252</i>  | Serpentine receptor, class H                                                            | 1.6                        |
| <i>T23B5.1</i>  | <i>prmt-9</i>   | Human PRMT9 (protein arginine methyltransferase 9) and PRMT7 ortholog                   | 1.5                        |
| <i>H37A05.1</i> | <i>lpin-1</i>   | <b>Phosphatidic acid phosphatase Lipin 1, Lipin 2, and Lipin 3</b>                      | <b>1.4</b>                 |
| <i>K04C1.1</i>  | <i>srg-37</i>   | G-protein coupled receptor (GPCR) of the serpentine receptor class g                    | 1.2                        |
| <i>K07A1.12</i> | <i>lin-53</i>   | Class B synMuv protein containing a 7 WD-repeat similar to the mammalian homolog RbAp48 | 1.2                        |
| <i>F26A3.2</i>  | <i>ncbp-2</i>   | <b>Nuclear cap-binding protein subunit 2</b>                                            | <b>1.1</b>                 |
| <i>E04A4.4</i>  | <i>hoe-1</i>    | <b>Two isoforms of a putative metal-dependent hydrolase orthologous to human ELAC2</b>  | <b>1.0</b>                 |

|                 |                 |                                                              |     |
|-----------------|-----------------|--------------------------------------------------------------|-----|
| <i>K04G11.2</i> | <i>sel-7</i>    | Suppressor/enhancer of Lin-12                                | 0.9 |
| <i>C32E12.4</i> | <i>C32E12.4</i> | Enriched in muscle cell and in the PVD, OLL, and AFD neurons | 0.8 |
| <i>T08G11.5</i> | <i>unc-29</i>   | Neuronal acetylcholine receptor subunit alpha-4              | 0.7 |

Enhancer RNAi clones targeting nineteen genes were sorted in descending order by average scores of six replicates from the liquid culture system (Figure S4A, step II).

Seven enhancer RNAi clones that increased *fat-5p::fat-5::gfp* expression on solid media were highlighted in bold (Figure S4A, step III).

**Table S4. The list of *fat-5p::fat-5::gfp* suppressor RNAi clones.**

| Gene ID                 | Gene name               | Gene description                                                   | Average score (6X repeats) |
|-------------------------|-------------------------|--------------------------------------------------------------------|----------------------------|
| <b><i>R12B2.5</i></b>   | <i>mdt-15</i>           | <b>Mediator subunit orthologous to human MED15</b>                 | <b>-2.6</b>                |
| <b><i>F35H10.4</i></b>  | <i>vha-5</i>            | <b>V-type proton ATPase subunit a</b>                              | <b>-2.5</b>                |
| <i>C50C3.6</i>          | <i>prp-8</i>            | Pre-mRNA-splicing factor 8 homolog                                 | -2.5                       |
| <b><i>K10C3.6A</i></b>  | <i>nhr-49</i>           | <b>HNF4 (hepatocyte nuclear factor 4) family of NHRs</b>           | <b>-2.5</b>                |
| <i>ZK652.1</i>          | <i>snr-5</i>            | Probable small nuclear ribonucleoprotein F                         | -2.2                       |
| <i>B0412.4</i>          | <i>rps-29</i>           | Human RPS29 (ribosomal protein S29) ortholog                       | -2.2                       |
| <i>C14C10.3</i>         | <i>ril-2</i>            | RNAi-Induced longevity                                             | -2.0                       |
| <b><i>Y53G8AR.9</i></b> | <b><i>Y53G8AR.9</i></b> | <b>Human ZC3H10 (zinc finger CCCH-type containing 10) ortholog</b> | <b>-1.9</b>                |
| <b><i>K09C8.5</i></b>   | <i>pxn-2</i>            | <b>Human PXDN (peroxidasin) ortholog</b>                           | <b>-1.9</b>                |

|                         |                       |                                                                                        |             |
|-------------------------|-----------------------|----------------------------------------------------------------------------------------|-------------|
| <i>F25B4.6</i>          | <i>hmgs-1</i>         | Human 3-hydroxy-3-methylglutaryl CoA synthase ortholog                                 | -1.7        |
| <i>F25B4.7</i>          | <i>F25B4.7</i>        | Human SLC25A31 (solute carrier family 25 member 31) ortholog                           | -1.7        |
| <i>R02D3.4</i>          | <i>ints-13</i>        | Human INTS13 (integrator complex subunit 13) ortholog                                  | -1.7        |
| <b><i>Y53G8AR.3</i></b> | <b><i>ral-1</i></b>   | <b>Human RAS like proto-oncogene B and RAS like proto-oncogene A ortholog</b>          | <b>-1.7</b> |
| <b><i>F57B9.3</i></b>   | <b><i>F57B9.3</i></b> | <b>Human EIF4A1 (eukaryotic translation initiation factor 4A1) and EIF4A2 ortholog</b> | <b>-1.7</b> |
| <i>C01H6.5</i>          | <i>nhr-23</i>         | Nuclear receptor ROR-beta                                                              | -1.6        |
| <i>F53B1.7</i>          | <i>gpa-5</i>          | GNA12 (G protein subunit alpha 12) and GNA13 (G protein subunit alpha 13)              | -1.5        |
| <i>Y53G8AR.7</i>        | <i>Y53G8AR.7</i>      | Human MFSD8 (major facilitator superfamily domain containing 8) ortholog               | -1.5        |
| <i>C12D8.12</i>         | <i>str-182</i>        | Seven transmembrane receptor                                                           | -1.3        |
| <b><i>C34G6.3</i></b>   | <b><i>C34G6.3</i></b> | <b>C34G6.3 is enriched in the germ line and male</b>                                   | <b>-1.3</b> |
| <i>C28G1.4</i>          | <i>C28G1.4</i>        | Human ZNF142 (zinc finger protein 142) ortholog                                        | -1.3        |
| <i>F47B10.2</i>         | <i>haly-1</i>         | Histidine ammonia lyase                                                                | -1.3        |
| <i>W03G11.1</i>         | <i>col-181</i>        | Collagen                                                                               | -1.3        |
| <i>F29G6.2</i>          | <i>ccdc-149</i>       | Human CCDC149 (coiled-coil domain containing 149) ortholog                             | -1.3        |
| <i>R53.4</i>            | <i>R53.4</i>          | Putative ATP synthase subunit f, mitochondrial                                         | -1.3        |
| <b><i>Y69H2.2</i></b>   | <b><i>egas-3</i></b>  | <b>Human SCNN (Sodium channels epithelial) family ortholog</b>                         | <b>-1.3</b> |
| <i>F18A1.3A</i>         | <i>lir-1</i>          | LIR-1C protein; LIn-26 related                                                         | -1.3        |

|                        |                        |                                                                                         |              |
|------------------------|------------------------|-----------------------------------------------------------------------------------------|--------------|
| <i>Y55F3BR.6</i>       | <i>Y55F3BR.6</i>       | Human HSPB6 (heat shock protein family B (small) member 6) ortholog                     | -1.2         |
| <i>W01A11.4</i>        | <i>lec-10</i>          | Galectin                                                                                | -1.2         |
| <i>Y79H2A.11</i>       | <i>zyg-8</i>           | Human DCLK1 (doublecortin like kinase 1) ortholog                                       | -1.2         |
| <i>Y111B2A.11</i>      | <i>epc-1</i>           | Human EPC1 (enhancer of polycomb 1) and EPC2 ortholog                                   | -1.2         |
| <i>F32D8.9</i>         | <i>spp-16</i>          | Saposin-like protein family                                                             | -1.2         |
| <b><i>K12G11.3</i></b> | <b><i>sodh-1</i></b>   | <b>Alcohol dehydrogenase 1</b>                                                          | <b>-1.2</b>  |
| <i>R07B1.1</i>         | <i>vab-15</i>          | Homeobox protein VAB-15                                                                 | -1.2         |
| <b><i>F21G4.3</i></b>  | <b><i>F21G4.3</i></b>  | <b>F21G4.3 is enriched in the amphid sheath cell</b>                                    | <b>-1.2.</b> |
| <i>C02B8.5</i>         | <i>frpr-1</i>          | <b>Homolog of the functionally active Fmrfr Receptor (FR) of <i>D. melanogaster</i></b> | <b>-1.1</b>  |
| <i>ZK856.5</i>         | <i>ZK856.5</i>         | Human SMPDL3A (sphingomyelin phosphodiesterase acid like 3A) and SMPDL3B ortholog       | -1.1         |
| <b><i>B0496.14</i></b> | <b><i>B0496.14</i></b> | <b>Non-coding RNA</b>                                                                   | <b>-1.1</b>  |
| <i>F35H10.10</i>       | <i>his-30</i>          | Histone H2A                                                                             | -1.1         |

Suppressor RNAi clones targeting thirty eight genes were listed in ascending order by average scores of 6 replicates from the liquid culture system (Figure S4A, Step II).

Thirteen suppressor RNAi clones that decreased *fat-5p::fat-5::gfp* expression on solid media were highlighted in bold (Figure S4A, Step III). Gray boxes indicate that RNAi bacteria targeting multiple genes, which were confirmed through sequencing.

**Table S5. Levels of fatty acids measured by using gas chromatography/mass spectrometry.**

| Fatty acids                     | Conditions                 | % Fatty acids in total lipids±SEM | p-values                                    | log <sub>2</sub> (fold change)±SEM in Figure 5E |
|---------------------------------|----------------------------|-----------------------------------|---------------------------------------------|-------------------------------------------------|
| Myristic acid (14:0)            | Control RNAi               | 0.8±0.0                           |                                             |                                                 |
|                                 | <i>lpin-1</i> RNAi         | 0.4±0.0                           | 0.0007                                      |                                                 |
|                                 | Control RNAi glucose       | 1.5±0.0                           | 0.0001                                      | -1.1±0.1                                        |
|                                 | <i>lpin-1</i> RNAi glucose | 1.1±0.0                           | 0.0036<br>0.0002 <sup>(ctrl RNAi glc)</sup> | 1.6±0.1                                         |
| 7-Tetradecenoic acid (14:1 n-7) | Control RNAi               | 0.4±0.0                           |                                             |                                                 |
|                                 | <i>lpin-1</i> RNAi         | 1.5±1.3                           | 0.4508                                      |                                                 |
|                                 | Control RNAi glucose       | 1.6±1.2                           | 0.3397                                      | 0.2±1.7                                         |
|                                 | <i>lpin-1</i> RNAi glucose | 1.6±1.3                           | 0.3842<br>0.9732 <sup>(ctrl RNAi glc)</sup> | 0.9±0.5                                         |
| Iso-C15 fatty acid (15:iso)     | Control RNAi               | 3.6±0.2                           |                                             |                                                 |
|                                 | <i>lpin-1</i> RNAi         | 2.6±1.1                           | 0.4243                                      |                                                 |
|                                 | Control RNAi glucose       | 2.6±1.1                           | 0.4033                                      | -1.1±1.2                                        |
|                                 | <i>lpin-1</i> RNAi glucose | 2.8±1.2                           | 0.5412<br>0.9226 <sup>(ctrl RNAi glc)</sup> | 0.0±0.1                                         |
| Pentadecanoic acid (15:0)       | Control RNAi               | 0.6±0.0                           |                                             |                                                 |
|                                 | <i>lpin-1</i> RNAi         | 0.5±0.2                           | 0.4946                                      |                                                 |
|                                 | Control RNAi glucose       | 0.5±0.0                           | 0.0564                                      | -0.5±0.5                                        |
|                                 | <i>lpin-1</i> RNAi glucose | 0.4±0.1                           | 0.0898<br>0.2687 <sup>(ctrl RNAi glc)</sup> | -0.3±0.1                                        |
| Palmitic acid                   | Control RNAi               | 3.7±0.1                           |                                             |                                                 |



|                                             |                            |           |                                                 |          |
|---------------------------------------------|----------------------------|-----------|-------------------------------------------------|----------|
| (16:0)                                      | <i>lpin-1</i> RNAi         | 1.8±0.1   | $p < 0.0001$                                    |          |
|                                             | Control RNAi glucose       | 7.0±0.218 | 0.0001                                          | -1.0±0.0 |
|                                             | <i>lpin-1</i> RNAi glucose | 4.5±0.1   | 0.0034<br>0.0003 <sup>(ctrl RNAi<br/>glc)</sup> | 1.3±0.1  |
|                                             | Control RNAi               | 0.9±0.0   |                                                 |          |
| Cis-7<br>hexadecenoic<br>acid<br>(16:1 n-9) | <i>lpin-1</i> RNAi         | 0.6±0.1   | 0.0242                                          |          |
|                                             | Control RNAi glucose       | 1.1±0.1   | 0.0548                                          | -0.5±0.1 |
|                                             | <i>lpin-1</i> RNAi glucose | 0.8±0.1   | 0.6629<br>0.0755 <sup>(ctrl RNAi<br/>glc)</sup> | 0.4±0.2  |
|                                             | Control RNAi               | 2.1±0.1   |                                                 |          |
| Palmitoleic acid<br>(16:1 n-7)              | <i>lpin-1</i> RNAi         | 2.4±0.1   | 0.0504                                          |          |
|                                             | Control RNAi glucose       | 4.3±0.4   | 0.0043                                          | 0.2±0.0  |
|                                             | <i>lpin-1</i> RNAi glucose | 4.3±0.3   | 0.0032<br>0.8737 <sup>(ctrl RNAi<br/>glc)</sup> | 0.8±0.2  |
|                                             | Control RNAi               | 4.3±0.2   |                                                 |          |
| Iso-C17<br>fatty acid<br>(17:iso)           | <i>lpin-1</i> RNAi         | 7.1±0.2   | 0.0007                                          |          |
|                                             | Control RNAi glucose       | 3.0±0.1   | 0.0030                                          | 0.7±0.0  |
|                                             | <i>lpin-1</i> RNAi glucose | 5.0±0.2   | 0.0492<br>0.0006 <sup>(ctrl RNAi<br/>glc)</sup> | -0.5±0.1 |
|                                             | Control RNAi               | 16.4±0.1  |                                                 |          |
| Cyclic C17<br>fatty acid<br>(17:cyc)        | <i>lpin-1</i> RNAi         | 10.2±0.3  | $p < 0.0001$                                    |          |
|                                             | Control RNAi glucose       | 17.4±0.2  | 0.0064                                          | -0.7±0.0 |
|                                             | <i>lpin-1</i> RNAi glucose | 13.1±0.8  | 0.0144<br>0.0060 <sup>(ctrl RNAi<br/>glc)</sup> | 0.4±0.1  |

|                             |                            |          |                                                 |          |
|-----------------------------|----------------------------|----------|-------------------------------------------------|----------|
|                             |                            |          | glc)                                            |          |
| Stearic acid<br>(18:0)      | Control RNAi               | 5.1±0.0  |                                                 |          |
|                             | <i>lpin-1</i> RNAi         | 3.0±0.0  | $p<0.0001$                                      |          |
|                             | Control RNAi glucose       | 4.8±0.0  | 0.0115                                          | -0.8±0.0 |
|                             | <i>lpin-1</i> RNAi glucose | 3.7±0.1  | 0.0002<br>0.0006 <sup>(ctrl RNAi<br/>glc)</sup> | 0.3±0.1  |
| Oleic acid,<br>(18:1 n-9)   | Control RNAi               | 3.2±0.1  |                                                 |          |
|                             | <i>lpin-1</i> RNAi         | 1.9±0.1  | 0.0005                                          |          |
|                             | Control RNAi glucose       | 3.6±0.1  | 0.0522                                          | -0.7±0.1 |
|                             | <i>lpin-1</i> RNAi glucose | 3.4±0.2  | 0.3915<br>0.3723 <sup>(ctrl RNAi<br/>glc)</sup> | 0.8±0.0  |
| Vaccenic acid<br>(18:1 n-7) | Control RNAi               | 10.6±0.2 |                                                 |          |
|                             | <i>lpin-1</i> RNAi         | 15.3±0.2 | $p<0.0001$                                      |          |
|                             | Control RNAi glucose       | 12.5±0.8 | 0.0839                                          | 0.5±0.0  |
|                             | <i>lpin-1</i> RNAi glucose | 16.5±1.0 | 0.0051<br>0.0391 <sup>(ctrl RNAi<br/>glc)</sup> | 0.1±0.1  |
| Ricinoleic acid<br>(18:1OH) | Control RNAi               | 2.0±0.1  |                                                 |          |
|                             | <i>lpin-1</i> RNAi         | 1.7±0.1  | 0.0825                                          |          |
|                             | Control RNAi glucose       | 2.7±0.2  | 0.0435                                          | -0.3±0.1 |
|                             | <i>lpin-1</i> RNAi glucose | 2.2±0.2  | 0.4980<br>0.1946 <sup>(ctrl RNAi<br/>glc)</sup> | 0.4±0.1  |
| Linoleic acid<br>(18:2n-6)  | Control RNAi               | 7.8±0.2  |                                                 |          |
|                             | <i>lpin-1</i> RNAi         | 9.6±0.2  | 0.0036                                          |          |
|                             | Control RNAi glucose       | 6.8±0.2  | 0.0223                                          | 0.3±0.1  |

|                                          |                            |         |                                                 |          |
|------------------------------------------|----------------------------|---------|-------------------------------------------------|----------|
|                                          | <i>lpin-1</i> RNAi glucose | 8.6±0.2 | 0.0366<br>0.0040 <sup>(ctrl RNAi<br/>glc)</sup> | -0.1±0.1 |
| γ-Linolenic acid<br>(18:3 n-6)           | Control RNAi               | 1.2±0.0 |                                                 |          |
|                                          | <i>lpin-1</i> RNAi         | 1.0±0.0 | 0.0022                                          |          |
|                                          | Control RNAi glucose       | 1.0±0.0 | 0.0017                                          | -0.2±0.0 |
|                                          | <i>lpin-1</i> RNAi glucose | 1.0±0.0 | 0.0029<br>0.9131 <sup>(ctrl RNAi<br/>glc)</sup> | 0.0±0.0  |
| Cyclic C19<br>fatty acid<br>(19:cyc)     | Control RNAi               | 5.4±0.1 |                                                 |          |
|                                          | <i>lpin-1</i> RNAi         | 6.5±0.3 | 0.0139                                          |          |
|                                          | Control RNAi glucose       | 4.6±0.4 | 0.1468                                          | 0.3±0.0  |
|                                          | <i>lpin-1</i> RNAi glucose | 5.0±0.4 | 0.4710<br>0.4653 <sup>(ctrl RNAi<br/>glc)</sup> | -0.4±0.1 |
| Dihomo-γ-<br>linolenic acid<br>(20:3n-6) | Control RNAi               | 2.5±0.1 |                                                 |          |
|                                          | <i>lpin-1</i> RNAi         | 3.4±0.0 | 0.0007                                          |          |
|                                          | Control RNAi glucose       | 1.9±0.1 | 0.0077                                          | 0.5±0.0  |
|                                          | <i>lpin-1</i> RNAi glucose | 2.3±0.0 | 0.1784<br>0.0060 <sup>(ctrl RNAi<br/>glc)</sup> | -0.6±0.0 |
| Eicosatetraenoic<br>acid<br>(20:4 n-3)   | Control RNAi               | 1.3±0.0 |                                                 |          |
|                                          | <i>lpin-1</i> RNAi         | 3.9±0.2 | 0.0003                                          |          |
|                                          | Control RNAi glucose       | 0.9±0.0 | 0.0008                                          | 1.6±0.1  |
|                                          | <i>lpin-1</i> RNAi glucose | 2.1±0.1 | 0.0008<br>0.0002 <sup>(ctrl RNAi<br/>glc)</sup> | -0.8±0.1 |
| Arachidonic acid                         | Control RNAi               | 3.2±0.2 |                                                 |          |

|                                   |                            |          |                                             |          |
|-----------------------------------|----------------------------|----------|---------------------------------------------|----------|
| (20:4n-6)                         | <i>lpin-1</i> RNAi         | 2.0±0.1  | 0.0025                                      |          |
|                                   | Control RNAi glucose       | 2.5±0.0  | 0.0155                                      | -0.7±0.1 |
|                                   | <i>lpin-1</i> RNAi glucose | 1.9±0.0  | 0.0016<br>0.0003 <sup>(ctrl RNAi glc)</sup> | -0.1±0.1 |
| Eicosapentaenoic acid<br>20:5 n-3 | Control RNAi               | 12.4±0.1 |                                             |          |
|                                   | <i>lpin-1</i> RNAi         | 10.9±0.3 | 0.0071                                      |          |
|                                   | Control RNAi glucose       | 10.5±0.2 | 0.0004                                      | -0.2±0.0 |
|                                   | <i>lpin-1</i> RNAi glucose | 10.2±0.1 | 0.0001<br>0.2271 <sup>(ctrl RNAi glc)</sup> | -0.1±0.0 |

The levels of fatty acids (%) indicate the averages of proportions of the specific fatty acids in total lipids.

Standard error of mean (SEM) was calculated from three biological replicates.

All *p* values were calculated by using two-tailed Student's *t*-test.

*p* values show comparison of each condition with control RNAi on control diets from triplicates.

<sup>ctrl RNAi glc</sup>: *p* values were calculated by comparing with control RNAi on glucose diets from triplicates.

Fold change in log<sub>2</sub> scale for *lpin-1* RNAi was calculated by dividing the levels of fatty acids (%) in *lpin-1* RNAi-treated worms on control diets by those in control RNAi-treated worms on control diets.

Fold change in log<sub>2</sub> scale for *lpin-1* RNAi glucose was calculated by dividing the levels of fatty acids (%) in *lpin-1* RNAi-treated worms on glucose diets by those in *lpin-1* RNAi-treated worms on control diets.

Bold dashed lines separate individual fatty acids.

**Table S6. Statistical analysis and additional repeats of lifespan assays upon feeding with fatty acids.**

| Tri<br>al | Strain/treatment<br>(fatty acid(s))                                                      | Mean<br>lifespan<br>±SEM<br>(days) | 75th<br>perce<br>ntile | % change <sup>Δ</sup>                        | Number of<br>animals that<br>died/total | <i>p</i> value vs.<br>control                                     | Figures<br>in text |
|-----------|------------------------------------------------------------------------------------------|------------------------------------|------------------------|----------------------------------------------|-----------------------------------------|-------------------------------------------------------------------|--------------------|
| #1        | N2/control RNAi<br>glucose                                                               | 11.7±0.3                           | 13                     |                                              | 83/90                                   |                                                                   | Figure<br>6A       |
|           | N2/control RNAi<br>glucose (myristic<br>acid (14:0) +<br>palmitic acid<br>(16:0))        | 9.6±0.3                            | 11                     | -18.4%                                       | 115/117                                 | <i>p</i> <0.0001                                                  | Figure<br>6A       |
|           | N2/ <i>lpin-1</i> RNAi<br>glucose                                                        | 9.7±0.2                            | 11                     | -17.1%                                       | 115/120                                 | <i>p</i> <0.0001                                                  | Figure<br>6B       |
|           | N2/ <i>lpin-1</i> RNAi<br>glucose (myristic<br>acid (14:0) +<br>palmitic acid<br>(16:0)) | 7.3±0.2                            | 8                      | -38.2%<br>-25% ( <i>lpin-1</i><br>RNAi glc)  | 114/120                                 | <i>p</i> <0.0001<br><i>p</i> <0.0001 ( <i>lpin-1</i><br>RNAi glc) | Figure<br>6B       |
| #2        | N2/control RNAi<br>glucose                                                               | 13.1±0.3                           | 14                     |                                              | 100/120                                 |                                                                   |                    |
|           | N2/control RNAi<br>glucose (myristic<br>acid (14:0) +<br>palmitic acid<br>(16:0))        | 12±0.3                             | 14                     | -8.3%                                        | 96/120                                  | 0.0375                                                            |                    |
|           | N2/ <i>lpin-1</i> RNAi<br>glucose                                                        | 11.2±0.1                           | 12                     | -14.7%                                       | 110/116                                 | <i>p</i> <0.0001                                                  |                    |
|           | N2/ <i>lpin-1</i> RNAi<br>glucose (myristic<br>acid (14:0) +<br>palmitic acid<br>(16:0)) | 10.8±0.2                           | 12                     | -17.5%<br>-3.2% ( <i>lpin-1</i><br>RNAi glc) | 107/120                                 | <i>p</i> <0.0001<br>0.477 ( <i>lpin-1</i> RNAi<br>glc)            |                    |
| #1        | N2/control RNAi<br>glucose                                                               | 11.9±0.3                           | 14                     |                                              | 84/90                                   |                                                                   | Figure<br>6C       |

|    |                                                              |          |    |                                           |         |                                                    |           |
|----|--------------------------------------------------------------|----------|----|-------------------------------------------|---------|----------------------------------------------------|-----------|
|    | N2/control RNAi glucose (oleic acid (18:1n-9))               | 10.6±0.2 | 12 | -11.1%                                    | 100/120 | 0.0011                                             | Figure 6C |
|    | N2/control RNAi glucose (linoleic acid, (18:2n-6))           | 14.4±0.3 | 16 | 20.3%                                     | 96/120  | $p<0.0001$                                         |           |
|    | N2/ <i>lpin-1</i> RNAi glucose                               | 10.2±0.1 | 10 | -14.4%                                    | 116/120 | $p<0.0001$                                         | Figure 6D |
|    | N2/ <i>lpin-1</i> RNAi glucose (oleic acid (18:1n-9))        | 10.1±0.1 | 10 | -15.2%<br>-1.0% ( <i>lpin-1</i> RNAi glc) | 110/120 | $p<0.0001$<br>0.5131 ( <i>lpin-1</i> RNAi glc)     | Figure 6D |
|    | N2/ <i>lpin-1</i> RNAi glucose (linoleic acid, (18:2n-6))    | 12.1±0.3 | 14 | 1.5%<br>18.6% ( <i>lpin-1</i> RNAi glc)   | 107/120 | 0.7866<br>$p<0.0001$ ( <i>lpin-1</i> RNAi glc)     |           |
| #2 | N2/control RNAi glucose                                      | 14.3±0.4 | 17 |                                           | 99/120  | $p<0.0001$                                         | Figure 6E |
|    | N2/control RNAi glucose (oleic acid (18:1n-9))               | 11.5±0.4 | 14 | -19.9%                                    | 105/120 | $p<0.0001$                                         |           |
|    | N2/control RNAi glucose (linoleic acid (18:2n-6))            | 14.3±0.4 | 17 | -0.2%                                     | 97/117  | 0.9611                                             | Figure 6E |
|    | N2/ <i>lpin-1</i> RNAi glucose                               | 10.2±0.1 | 11 | -28.5%                                    | 102/120 | $p<0.0001$                                         | Figure 6F |
|    | N2/ <i>lpin-1</i> RNAi glucose (oleic acid (18:1n-9))        | 10.0±0.1 | 11 | -30.2%<br>-2.3% ( <i>lpin-1</i> RNAi glc) | 98/110  | $p<0.0001$<br>0.1957 ( <i>lpin-1</i> RNAi glc)     |           |
|    | N2/ <i>lpin-1</i> RNAi glucose (linoleic acid, (18:2n-6))    | 11.6±0.3 | 14 | -19.1%<br>13.2% ( <i>lpin-1</i> RNAi glc) | 106/120 | $p<0.0001$<br>$p<0.0001$ ( <i>lpin-1</i> RNAi glc) | Figure 6F |
| #1 | N2/control RNAi glucose                                      | 13.7±0.4 | 14 |                                           | 92/120  |                                                    | Figure 6G |
|    | N2/ <i>lpin-1</i> RNAi glucose                               | 10.6±0.2 | 12 | -22.3%                                    | 107/120 | $p<0.0001$                                         | Figure 6H |
|    | N2/control RNAi glucose (arachidonic acid, (20:4n-6))        | 11.4±0.3 | 14 | -16.7%                                    | 106/120 | $p<0.0001$                                         | Figure 6G |
|    | N2/ <i>lpin-1</i> RNAi glucose (arachidonic acid, (20:4n-6)) | 13.7±0.3 | 14 | 0.2%<br>29.0% ( <i>lpin-1</i> RNAi glc)   | 93/120  | 0.7546<br>$p<0.0001$ ( <i>lpin-1</i> RNAi glc)     | Figure 6H |

|    |                                                              |          |    |                                          |         |                                                      |  |
|----|--------------------------------------------------------------|----------|----|------------------------------------------|---------|------------------------------------------------------|--|
| #2 | N2/control RNAi glucose                                      | 12.9±0.3 | 16 |                                          | 107/120 |                                                      |  |
|    | N2/ <i>lpin-1</i> RNAi glucose                               | 10.6±0.2 | 12 | -17.8%                                   | 111/120 | <i>p</i> <0.0001                                     |  |
|    | N2/control RNAi glucose (arachidonic acid, (20:4n-6))        | 13.8±0.3 | 16 | 6.5%                                     | 106/120 | 0.0388                                               |  |
|    | N2/ <i>lpin-1</i> RNAi glucose (arachidonic acid, (20:4n-6)) | 12.7±0.2 | 16 | -1.8%<br>19.5% ( <i>lpin-1</i> RNAi glc) | 116/120 | 0.4346<br><i>p</i> <0.0001 ( <i>lpin-1</i> RNAi glc) |  |

Lifespan data from the same experimental sets were indicated by bold lines and biological repeats were separated by bold dashed lines and stating trial numbers.

All *p* values were calculated by using log-rank test.

Percent change (%) and *p* values indicate comparison of each condition with ethanol (EtOH: solvent control)-treated control RNAi condition on glucose-rich diets within the same experimental dataset.

*lpin-1* RNAi glc: percent change (%) and *p* values were calculated by comparing with EtOH-treated *lpin-1*(RNAi) worms on glucose diets within the same experimental dataset.

‘Figures in text’ indicates lifespan dataset that was used in designated Figures.

**Table S7. Statistical analysis and additional repeats of lifespan assays with RNAi and transgene of fatty acid desaturases.**

| Trial | Strain/treatment (fatty acid(s)) | Mean lifespan ±SEM (days) | 75th percentile | % change <sup>Δ</sup> | Number of animals that died/total | <i>p</i> value vs. control | Figures in text |
|-------|----------------------------------|---------------------------|-----------------|-----------------------|-----------------------------------|----------------------------|-----------------|
|-------|----------------------------------|---------------------------|-----------------|-----------------------|-----------------------------------|----------------------------|-----------------|

|    |                                      |          |    |                                           |         |                                                |               |
|----|--------------------------------------|----------|----|-------------------------------------------|---------|------------------------------------------------|---------------|
| #1 | N2/control RNAi glucose              | 15.1±0.4 | 19 |                                           | 107/120 |                                                | Figure S8A    |
|    | N2/ <i>fat-6</i> RNAi (1/2) glucose  | 12.7±0.2 | 13 | -15.9%                                    | 113/120 | $p<0.0001$                                     | Figure S8A    |
|    | N2/ <i>lpin-1</i> RNAi (1/2) glucose | 9.8±0.2  | 13 | -35.1%                                    | 115/120 | $p<0.0001$                                     | Figure S8B    |
|    | N2/ <i>fat-6/lpin-1</i> RNAi glucose | 9.6±0.2  | 13 | -36.4%<br>-2.0% ( <i>lpin-1</i> RNAi glc) | 108/120 | $p<0.0001$<br>0.3944 ( <i>lpin-1</i> RNAi glc) | Figure S8B    |
|    | N2/ <i>fat-2</i> RNAi (1/2) glucose  | 15.3±0.4 | 19 | 1.32%                                     | 102/120 | 0.7277                                         |               |
|    | N2/ <i>fat-4</i> RNAi (1/2) glucose  | 15.2±0.3 | 19 | 0.7%                                      | 105/120 | 0.9799                                         |               |
| #2 | N2/control RNAi glucose              | 15.1±0.4 | 18 |                                           |         |                                                | Figure S8C, D |
|    | N2/ <i>fat-6</i> RNAi (1/2) glucose  | 13.9±0.2 | 16 | -7.9%                                     | 116/120 | 0.0001                                         |               |
|    | N2/ <i>lpin-1</i> RNAi (1/2) glucose | 10±0.2   | 10 | -33.8%                                    | 106/120 | $p<0.0001$                                     |               |
|    | N2/ <i>fat-6/lpin-1</i> RNAi glucose | 10.6±0.2 | 13 | -29.8%<br>6.0% ( <i>lpin-1</i> RNAi glc)  | 110/120 | $p<0.0001$<br>0.0394 ( <i>lpin-1</i> RNAi glc) |               |
|    | N2/ <i>fat-2</i> RNAi (1/2) glucose  | 16.1±0.3 | 18 | 6.6%                                      | 100/119 | 0.0654                                         | Figure S8C    |
|    | N2/ <i>fat-4</i> RNAi (1/2) glucose  | 16.9±0.3 | 20 | 11.9%                                     | 109/120 | 0.0002                                         | Figure S8D    |
| #1 | N2/control RNAi glucose              | 14.9±0.3 | 18 |                                           | 105/120 |                                                | Figure S8E    |
|    | N2/ <i>lpin-1</i> RNAi glucose       | 10.3±0.2 | 12 | -30.9%                                    | 105/120 | $p<0.0001$                                     | Figure S8E    |
|    | N2/ <i>fat-1</i> RNAi glucose        | 14.8±0.3 | 18 | -0.7%                                     | 106/120 | 0.8586                                         | Figure S8E    |
|    | N2/ <i>fat-1/lpin-1</i> RNAi glucose | 10.8±0.2 | 12 | -27.5%<br>4.9% ( <i>lpin-1</i> RNAi glc)  | 112/120 | $p<0.0001$<br>0.1524 ( <i>lpin-1</i> RNAi glc) | Figure S8E    |
| #2 | N2/control RNAi glucose              | 13±0.4   | 16 |                                           | 117/120 |                                                |               |
|    | N2/ <i>lpin-1</i> RNAi glucose       | 9.7±0.2  | 12 | -25.4%                                    | 114/120 | $p<0.0001$                                     |               |
|    | N2/ <i>fat-1</i> RNAi glucose        | 13.1±0.3 | 16 | 0.8%                                      | 92/120  | 0.6709                                         |               |



|    |                                                              |          |    |                                               |         |                                                           |               |
|----|--------------------------------------------------------------|----------|----|-----------------------------------------------|---------|-----------------------------------------------------------|---------------|
|    | N2/ <i>fat-1</i> / <i>lpin-1</i><br>RNAi glucose             | 9.8±0.2  | 12 | -24.6%<br>1.0% ( <i>lpin-1</i><br>RNAi glc)   | 115/120 | $p < 0.0001$<br>0.929 ( <i>lpin-1</i> RNAi<br>glc)        |               |
| #1 | <i>odr-1p::rfp</i> /control<br>RNAi glucose                  | 13.8±0.4 | 17 |                                               | 100/120 |                                                           | Figure<br>S8F |
|    | <i>odr-1p::rfp/lpin-1</i><br>RNAi glucose                    | 10±0.2   | 11 | -27.5%                                        | 109/120 | $p < 0.0001$                                              | Figure<br>S8F |
|    | <i>fat-2p::fat-2::gfp</i> /control RNAi<br>glucose           | 14.8±0.3 | 18 | 7.2%                                          | 109/120 | 0.1554                                                    | Figure<br>S8F |
|    | <i>fat-2p::fat-2::gfp</i><br>/ <i>lpin-1</i> RNAi<br>glucose | 9.2±0.2  | 10 | -33.3%<br>-8.0% ( <i>lpin-1</i><br>RNAi glc)  | 94/100  | $p < 0.0001$<br>$p < 0.0001$ ( <i>lpin-1</i><br>RNAi glc) | Figure<br>S8F |
| #2 | <i>odr-1p::rfp</i> /control<br>RNAi glucose                  | 13±0.3   | 15 |                                               | 114/120 |                                                           |               |
|    | <i>odr-1p::rfp/lpin-1</i><br>RNAi glucose                    | 9.7±0.1  | 11 | -25.4%                                        | 109/120 | $p < 0.0001$                                              |               |
|    | <i>fat-2p::fat-2::gfp</i> /control RNAi<br>glucose           | 13.7±0.3 | 16 | 5.4%                                          | 108/119 | 0.2637                                                    |               |
|    | <i>fat-2p::fat-2::gfp</i><br>/ <i>lpin-1</i> RNAi<br>glucose | 9.2±0.2  | 10 | -29.2%<br>-5.15% ( <i>lpin-1</i><br>RNAi glc) | 65/75   | $p < 0.0001$<br>0.0002 ( <i>lpin-1</i><br>RNAi glc)       |               |

Lifespan data from the same experimental sets were indicated by bold lines and biological repeats were separated by bold dashed lines and stating trial numbers.

All  $p$  values were calculated by using log-rank test.

Percent change (%) and  $p$  values were calculated by comparing each condition with control RNAi on control diets within the same experimental dataset.

*lpin-1* RNAi glc: percent change (%) and  $p$  values were calculated by comparing with N2 or *odr-1p::rfp* treated with *lpin-1* RNAi on glucose diets within the same experimental dataset.

(1/2) indicates RNAi bacteria mixed with control RNAi bacteria (1:1 ratio)

'Figures in text' indicates lifespan dataset that was used in designated Figures.

## Supporting References

- Ashrafi, K., Chang, F. Y., Watts, J. L., Fraser, A. G., Kamath, R. S., Ahringer, J., & Ruvkun, G. (2003). Genome-wide RNAi analysis of *Caenorhabditis elegans* fat regulatory genes. *Nature*, *421*(6920), 268-272. doi:10.1038/nature01279
- Brock, T. J., Browse, J., & Watts, J. L. (2006). Genetic regulation of unsaturated fatty acid composition in *C. elegans*. *PLoS Genet*, *2*(7), e108. doi:10.1371/journal.pgen.0020108
- Consortium, T. U. (2019). UniProt: a worldwide hub of protein knowledge. *Nucleic Acids Res*, *47*(D1), D506-d515. doi:10.1093/nar/gky1049
- Dobin, A., Davis, C. A., Schlesinger, F., Drenkow, J., Zaleski, C., Jha, S., . . . Gingeras, T. R. (2013). STAR: ultrafast universal RNA-seq aligner. *Bioinformatics*, *29*(1), 15-21. doi:10.1093/bioinformatics/bts635
- Falcon, S., & Gentleman, R. (2007). Using GOstats to test gene lists for GO term association. *Bioinformatics*, *23*(2), 257-258. doi:10.1093/bioinformatics/btl567
- Gems, D., & Riddle, D. L. (2000). Defining wild-type life span in *Caenorhabditis elegans*. *J Gerontol A Biol Sci Med Sci*, *55*(5), B215-219. doi:10.1093/gerona/55.5.b215
- Han, S. K., Lee, D., Lee, H., Kim, D., Son, H. G., Yang, J. S., . . . Kim, S. (2016). OASIS 2: online application for survival analysis 2 with features for the analysis of maximal lifespan and healthspan in aging research. *Oncotarget*, *7*(35), 56147-56152. doi:10.18632/oncotarget.11269
- Hoogewijs, D., Houthoofd, K., Matthijssens, F., Vandesompele, J., & Vanfleteren, J. R. (2008).

- Selection and validation of a set of reliable reference genes for quantitative sod gene expression analysis in *C. elegans*. *BMC Mol Biol*, 9, 9. doi:10.1186/1471-2199-9-9
- Kaletsky, R., Yao, V., Williams, A., Runnels, A. M., Tadych, A., Zhou, S., . . . Murphy, C. T. (2018). Transcriptome analysis of adult *Caenorhabditis elegans* cells reveals tissue-specific gene and isoform expression. *PLoS Genet*, 14(8), e1007559. doi:10.1371/journal.pgen.1007559
- Khuwijitjaru, P., Adachi, S., & Matsuno, R. (2002). Solubility of saturated fatty acids in water at elevated temperatures. *Biosci Biotechnol Biochem*, 66(8), 1723-1726. doi:10.1271/bbb.66.1723
- Kosugi, S., Hasebe, M., Tomita, M., & Yanagawa, H. (2009). Systematic identification of cell cycle-dependent yeast nucleocytoplasmic shuttling proteins by prediction of composite motifs. *Proc Natl Acad Sci U S A*, 106(25), 10171-10176. doi:10.1073/pnas.0900604106
- Larkin, M. A., Blackshields, G., Brown, N. P., Chenna, R., McGettigan, P. A., McWilliam, H., . . . Higgins, D. G. (2007). Clustal W and Clustal X version 2.0. *Bioinformatics*, 23(21), 2947-2948. doi:10.1093/bioinformatics/btm404
- Lee, D., An, S. W. A., Jung, Y., Yamaoka, Y., Ryu, Y., Goh, G. Y. S., . . . Lee, S. V. (2019). MDT-15/MED15 permits longevity at low temperature via enhancing lipidostasis and proteostasis. *PLoS Biol*, 17(8), e3000415. doi:10.1371/journal.pbio.3000415
- Lee, D., Jeong, D. E., Son, H. G., Yamaoka, Y., Kim, H., Seo, K., . . . Lee, S. J. (2015). SREBP and MDT-15 protect *C. elegans* from glucose-induced accelerated aging by preventing accumulation of saturated fat. *Genes Dev*, 29(23), 2490-2503. doi:10.1101/gad.266304.115
- Lehner, B., Tischler, J., & Fraser, A. G. (2006). RNAi screens in *Caenorhabditis elegans* in a 96-

- well liquid format and their application to the systematic identification of genetic interactions. *Nat Protoc*, *1*(3), 1617-1620. doi:10.1038/nprot.2006.245
- Li, B., & Dewey, C. N. (2011). RSEM: accurate transcript quantification from RNA-Seq data with or without a reference genome. *BMC Bioinformatics*, *12*, 323. doi:10.1186/1471-2105-12-323
- Liu, W., Xie, Y., Ma, J., Luo, X., Nie, P., Zuo, Z., . . . Ren, J. (2015). IBS: an illustrator for the presentation and visualization of biological sequences. *Bioinformatics*, *31*(20), 3359-3361. doi:10.1093/bioinformatics/btv362
- Love, M. I., Huber, W., & Anders, S. (2014). Moderated estimation of fold change and dispersion for RNA-seq data with DESeq2. *Genome Biol*, *15*(12), 550. doi:10.1186/s13059-014-0550-8
- Mariol, M. C., Walter, L., Bellemin, S., & Gieseler, K. (2013). A rapid protocol for integrating extrachromosomal arrays with high transmission rate into the *C. elegans* genome. *J Vis Exp*(82), e50773. doi:10.3791/50773
- O'Rourke, E. J., Kuballa, P., Xavier, R., & Ruvkun, G. (2013). omega-6 Polyunsaturated fatty acids extend life span through the activation of autophagy. *Genes Dev*, *27*(4), 429-440. doi:10.1101/gad.205294.112
- Pathare, P. P., Lin, A., Bornfeldt, K. E., Taubert, S., & Van Gilst, M. R. (2012). Coordinate regulation of lipid metabolism by novel nuclear receptor partnerships. *PLoS Genet*, *8*(4), e1002645. doi:10.1371/journal.pgen.1002645
- Peterfy, M., Phan, J., Xu, P., & Reue, K. (2001). Lipodystrophy in the *fld* mouse results from mutation of a new gene encoding a nuclear protein, lipin. *Nat Genet*, *27*(1), 121-124. doi:10.1038/83685

- Pino, E. C., Webster, C. M., Carr, C. E., & Soukas, A. A. (2013). Biochemical and high throughput microscopic assessment of fat mass in *Caenorhabditis elegans*. *J Vis Exp*(73). doi:10.3791/50180
- Reue, K., & Zhang, P. (2008). The lipin protein family: dual roles in lipid biosynthesis and gene expression. *FEBS Lett*, 582(1), 90-96. doi:10.1016/j.febslet.2007.11.014
- Schneider, C. A., Rasband, W. S., & Eliceiri, K. W. (2012). NIH Image to ImageJ: 25 years of image analysis. *Nat Methods*, 9(7), 671-675.
- Steinbaugh, M. J., Narasimhan, S. D., Robida-Stubbs, S., Moronetti Mazzeo, L. E., Dreyfuss, J. M., Hourihan, J. M., . . . Blackwell, T. K. (2015). Lipid-mediated regulation of SKN-1/Nrf in response to germ cell absence. *Elife*, 4. doi:10.7554/eLife.07836
- Stiernagle, T. (2006). Maintenance of *C. elegans*. *WormBook*, 1-11. doi:10.1895/wormbook.1.101.1
- Supek, F., Bosnjak, M., Skunca, N., & Smuc, T. (2011). REVIGO summarizes and visualizes long lists of gene ontology terms. *PLoS One*, 6(7), e21800. doi:10.1371/journal.pone.0021800
- Yang, F., Vought, B. W., Satterlee, J. S., Walker, A. K., Jim Sun, Z. Y., Watts, J. L., . . . Naar, A. M. (2006). An ARC/Mediator subunit required for SREBP control of cholesterol and lipid homeostasis. *Nature*, 442(7103), 700-704. doi:10.1038/nature04942
- Yang, J. S., Nam, H. J., Seo, M., Han, S. K., Choi, Y., Nam, H. G., . . . Kim, S. (2011). OASIS: online application for the survival analysis of lifespan assays performed in aging research. *PLoS One*, 6(8), e23525. doi:10.1371/journal.pone.0023525
- Zhang, Y., Chen, D., Smith, M. A., Zhang, B., & Pan, X. (2012). Selection of reliable reference genes in *Caenorhabditis elegans* for analysis of nanotoxicity. *PLoS One*, 7(3), e31849.

doi:10.1371/journal.pone.0031849
